# Supplementary material
Source: bioRxiv or medRxiv preprint supplement (https://medrxiv.org/highwire/filestream/78735/field_highwire_adjunct_files/0/2020.04.26.20080994-1.pdf)
Supplement: Supplementary file [file 2020.04.26.20080994-1.pdf]

**Supporting Information for: Estimates of the ongoing need for social distancing and control measures post-“lockdown” from trajectories of COVID-19 cases and mortality.**

Mike Loneran and James Chalmers

Division of Molecular and Clinical Medicine, School of Medicine, University of Dundee, Dundee,  
UK

Corresponding author: Mike Loneran, Division of Molecular and Clinical Medicine, University of Dundee,

Ninewells Hospital and Medical School, Dundee, DD1 9SY, m.loneran@dundee.ac.uk

Contents:

- 1) Details of Supplementary Table 1: Parameter estimates from models of exponential trajectories within COVID-19 outbreaks for 76 countries, though most have very limited or imprecise data
- 2) Supplementary plots of trajectories, similar to those in Figure 1 of the paper, for all the countries listed in Supplementary table 1
- 3) The R code used for the calculations.

1) **Structure of Supplementary Table 1:** Parameter estimates from models of exponential trajectories within COVID-19 outbreaks for 76 countries, though most have very limited or imprecise data.

The data are in a separate .csv file.

Column headings start with c for cases or d for deaths; then b for before lockdown or a for after locking down. Those containing the bounds of 95% CI end in l or u.

Cores of column names:

|             |                                                             |
|-------------|-------------------------------------------------------------|
| casemodel   | "?" indicates doubt about the case models                   |
| deathmodel  | "?" indicates doubt about the mortality models              |
| cases       | total number of recorded cases                              |
| deaths      | total number of deaths recorded                             |
| **firstday  | day of year of start of exponential period                  |
| **lastday   | day of year of end of exponential period                    |
| **slope     | slope of exponential model                                  |
| **se        | standard error of slope of exponential model                |
| **dble      | doubling time estimate                                      |
| *ahalve     | halving time estimate (included for convenience)            |
| **r0        | estimate of R0                                              |
| sloperat    | ratio of slopes of the two exponential periods              |
| *propunlock | proportion of time not on lockdown                          |
| *prf        | proportion of reclaimable of former behavior (based on R0s) |

## 2) Plots for individual countries

The dots are numbers of new cases or deaths reported to the ECDC for each day up to April 18<sup>th</sup> 2020. Each grey pipe shows the 95% confidence interval around a smooth trajectory (black line) estimated by a generalised additive model. In red are increasing and decreasing exponential patterns (mean & 95% CI) fitted to subsets of the data. Details of the models are in the main text.

Only countries for which at least one exponential period was identified are shown.

For some countries the approach produces convincing results, for others, especially where there is little data, the results are much less convincing. Adjusting the constraints and model selection approach will, subjectively, improve some results but worsen others. It was felt more important to use a consistent method than optimise the results for each individual country, and the poor fits are included to give a fair impression of the approach and its limitations.

While visually very strong, the grey pipe around each GAM result should not be mistaken for the truth: it is also the output of a model with a set of assumptions.

# Afghanistan

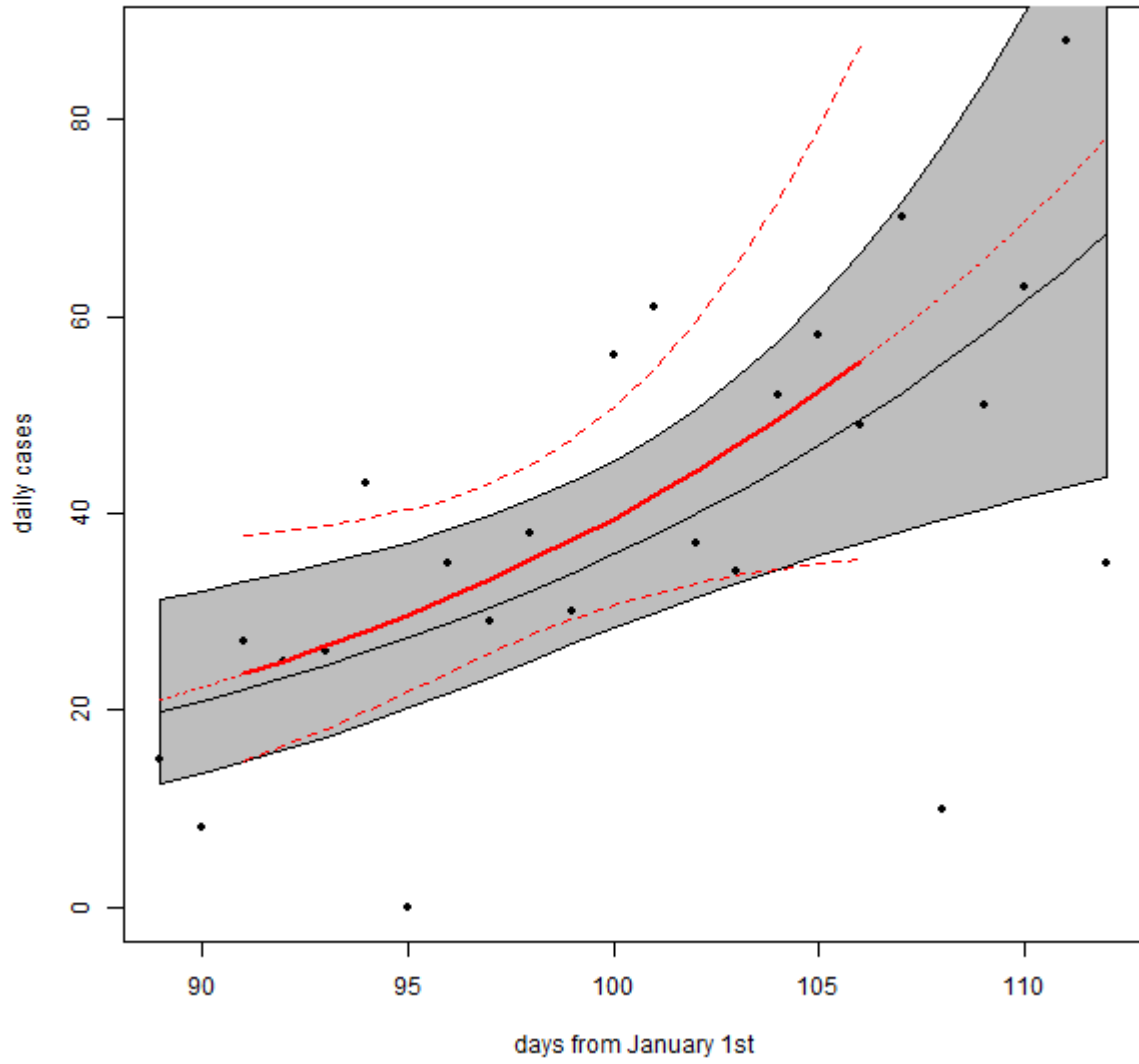

# Argentina

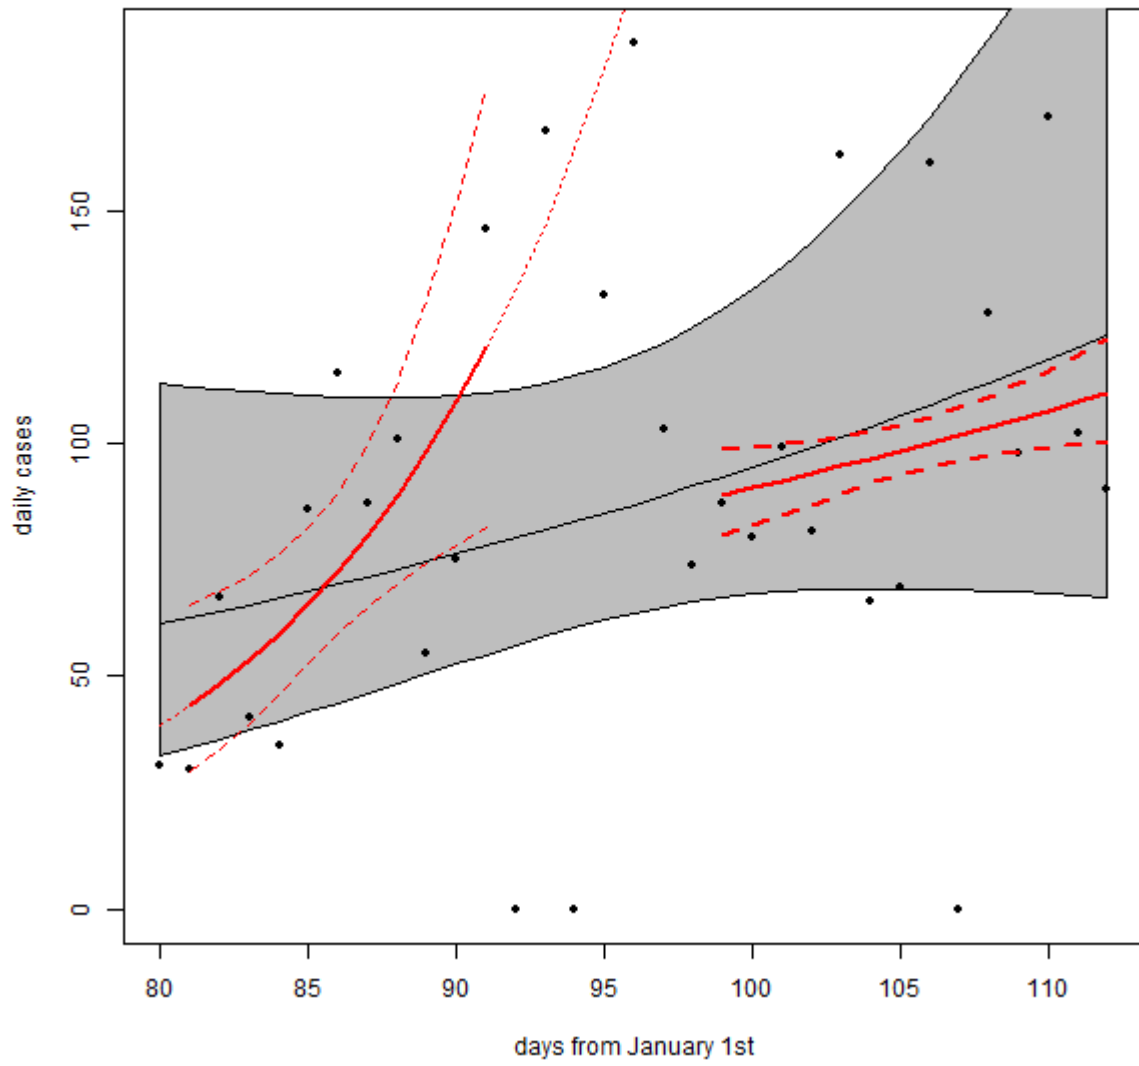

# Armenia

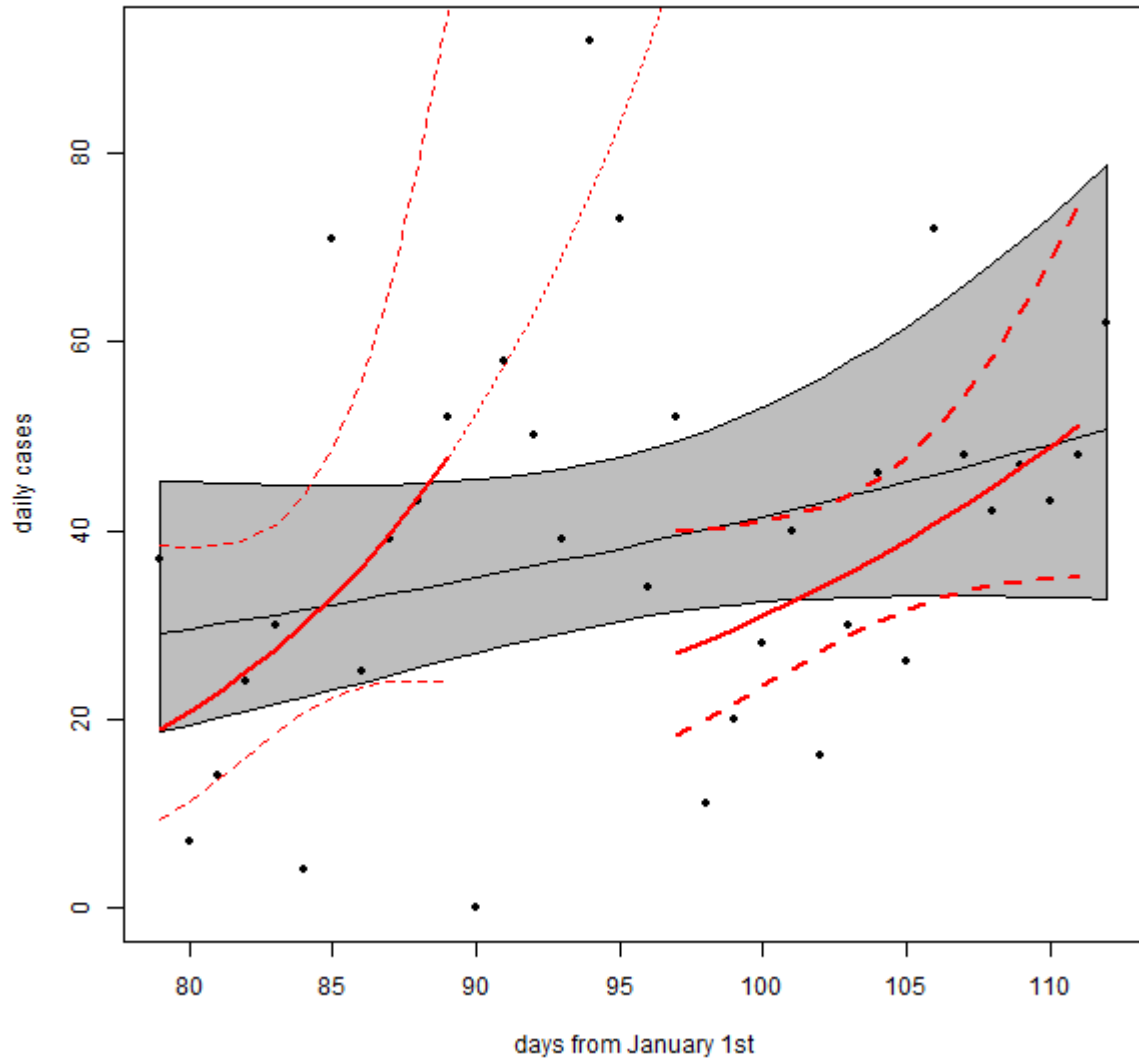

### Austria

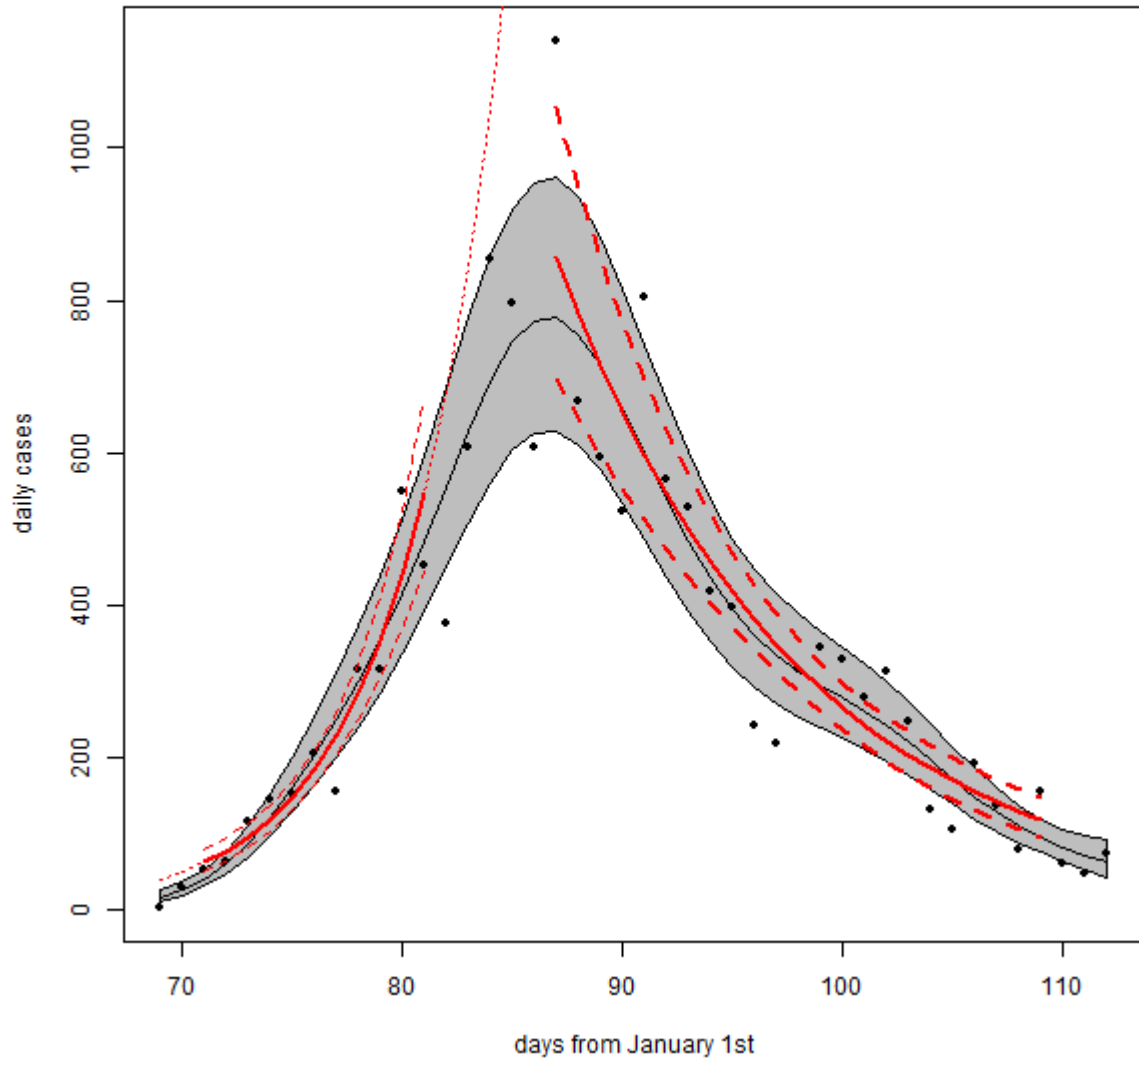

### Austria

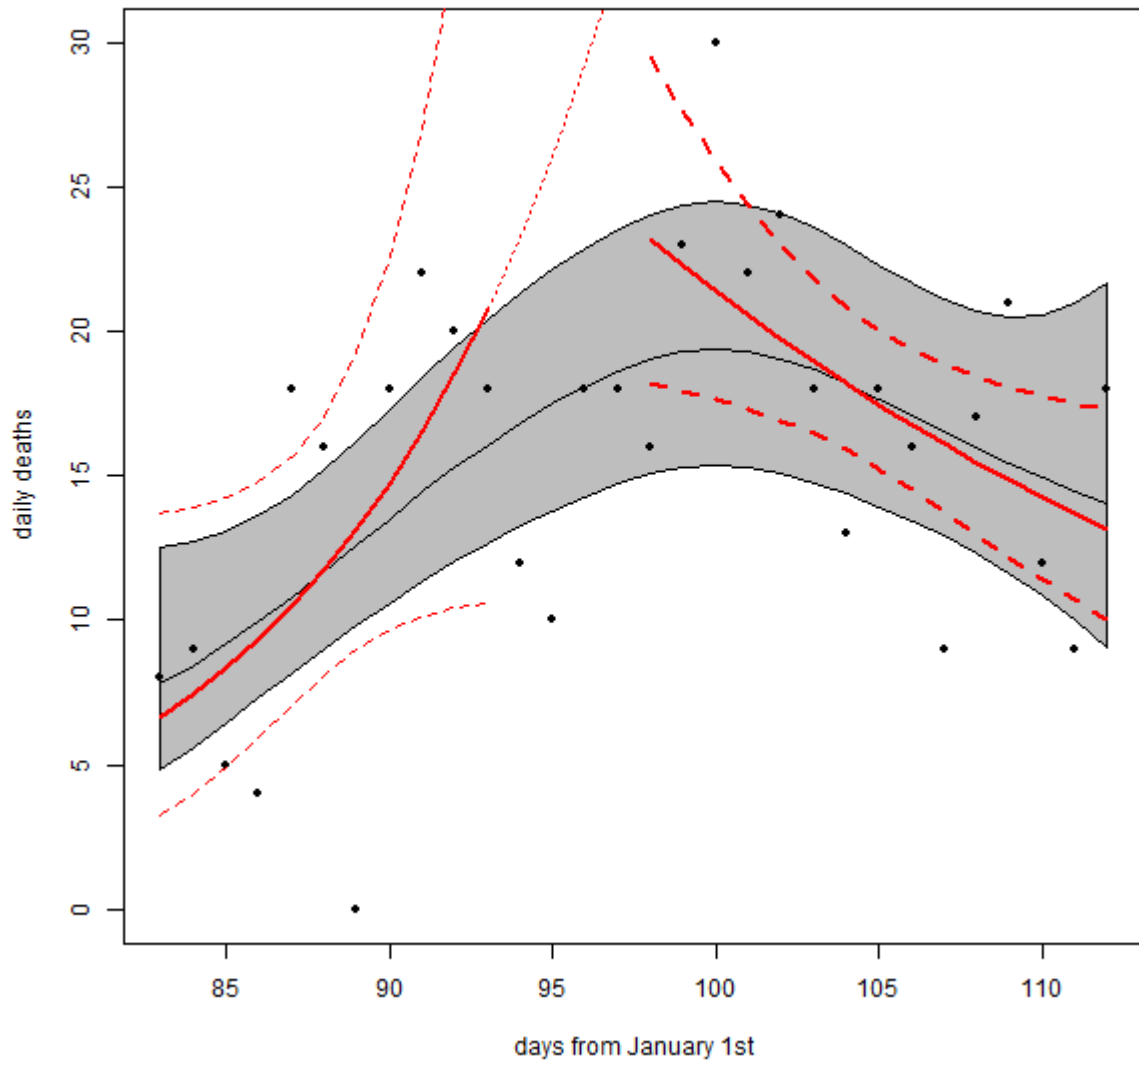



# Bahrain

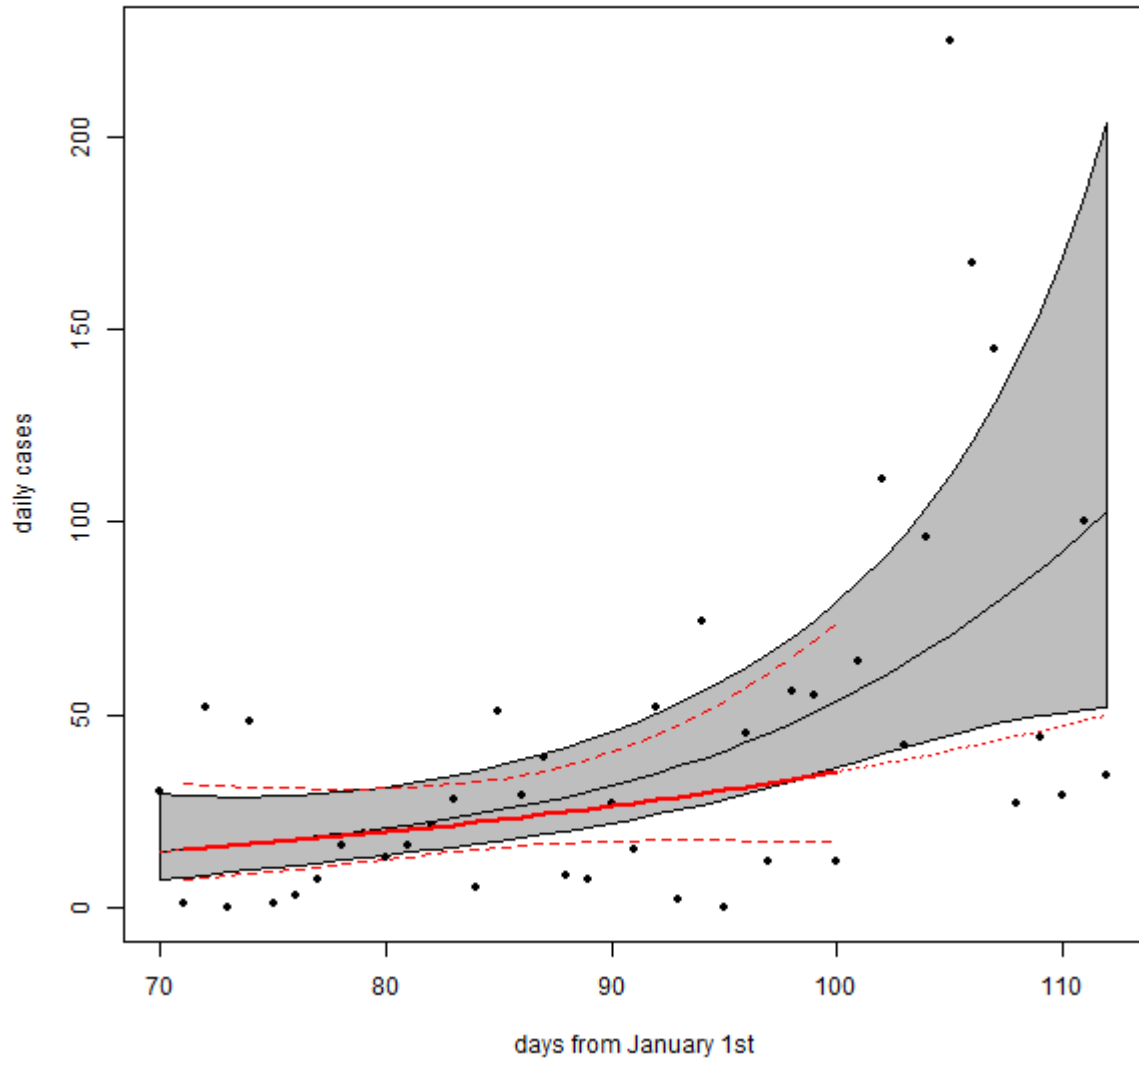

# Belarus

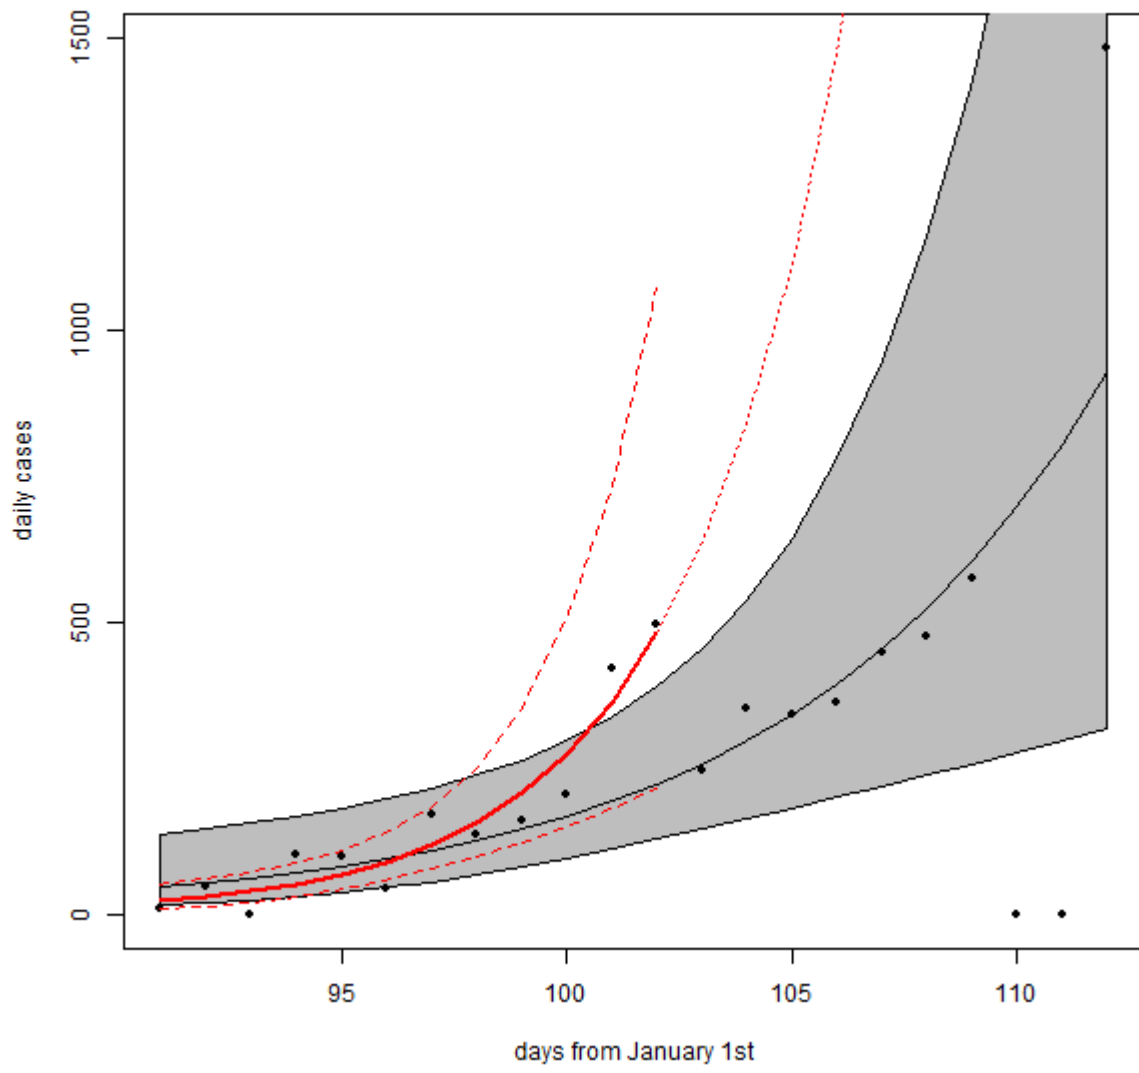

# Belgium

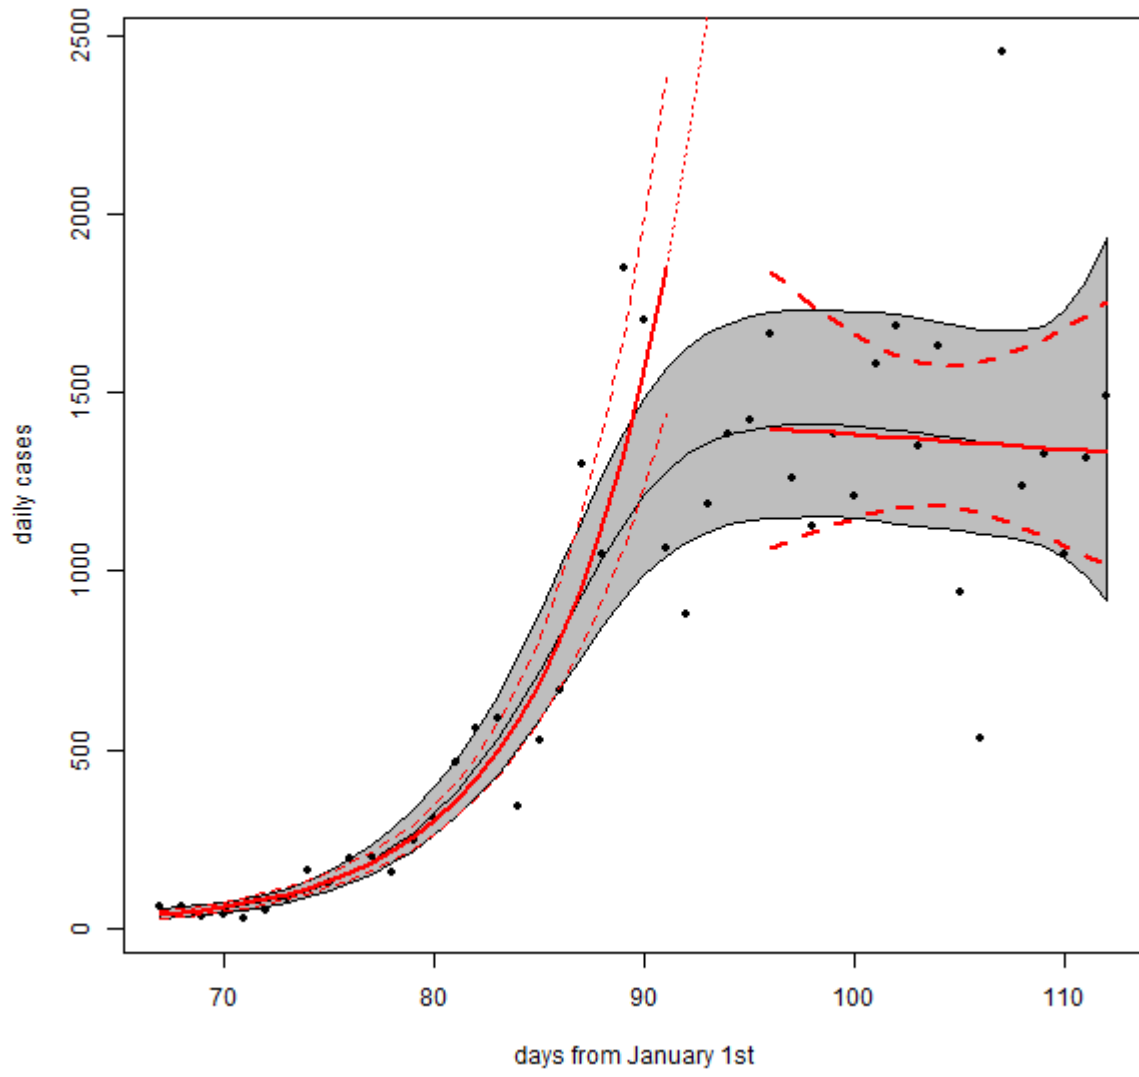

# Belgium

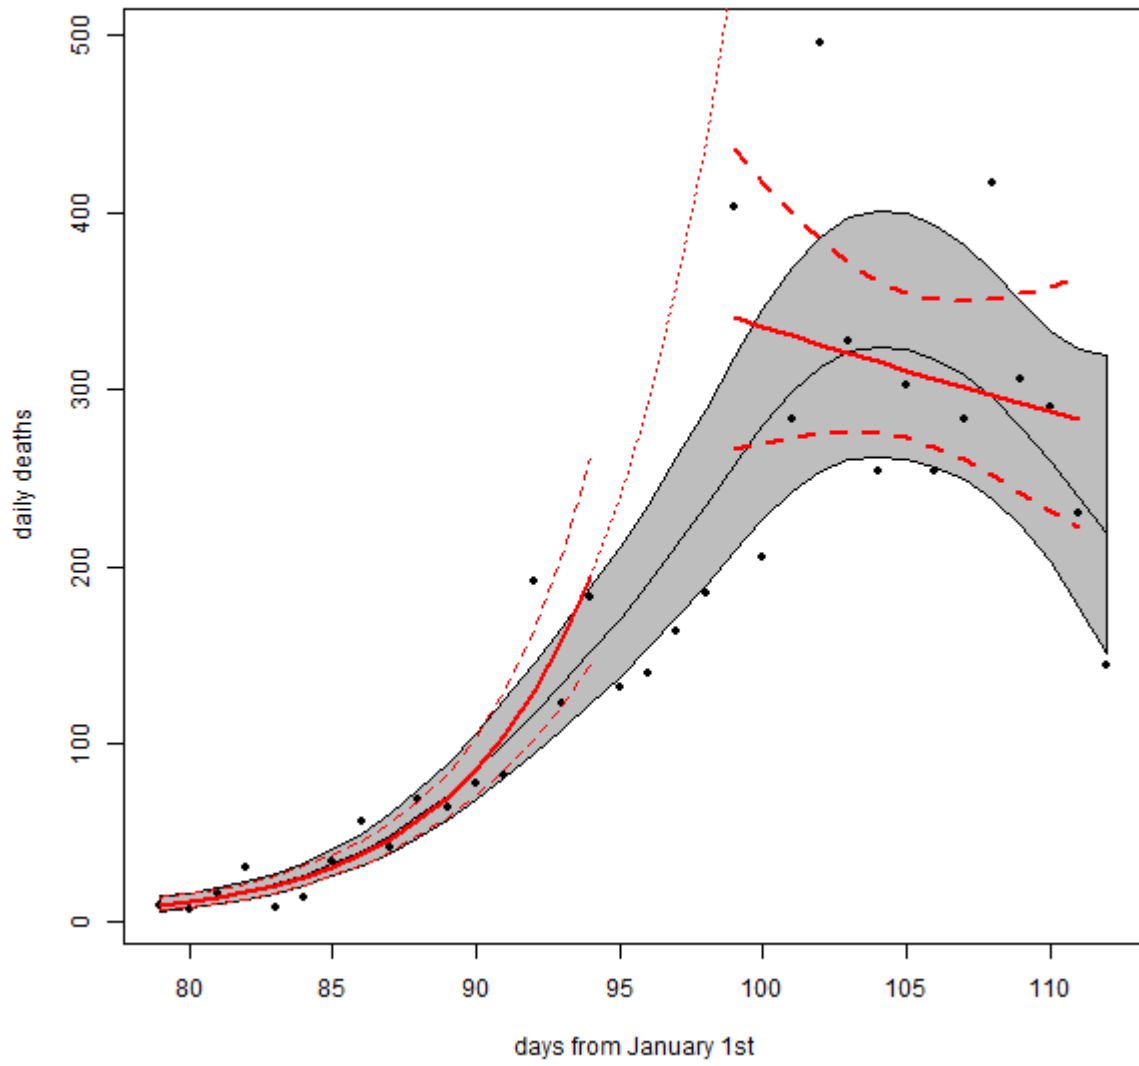

# Bosnia

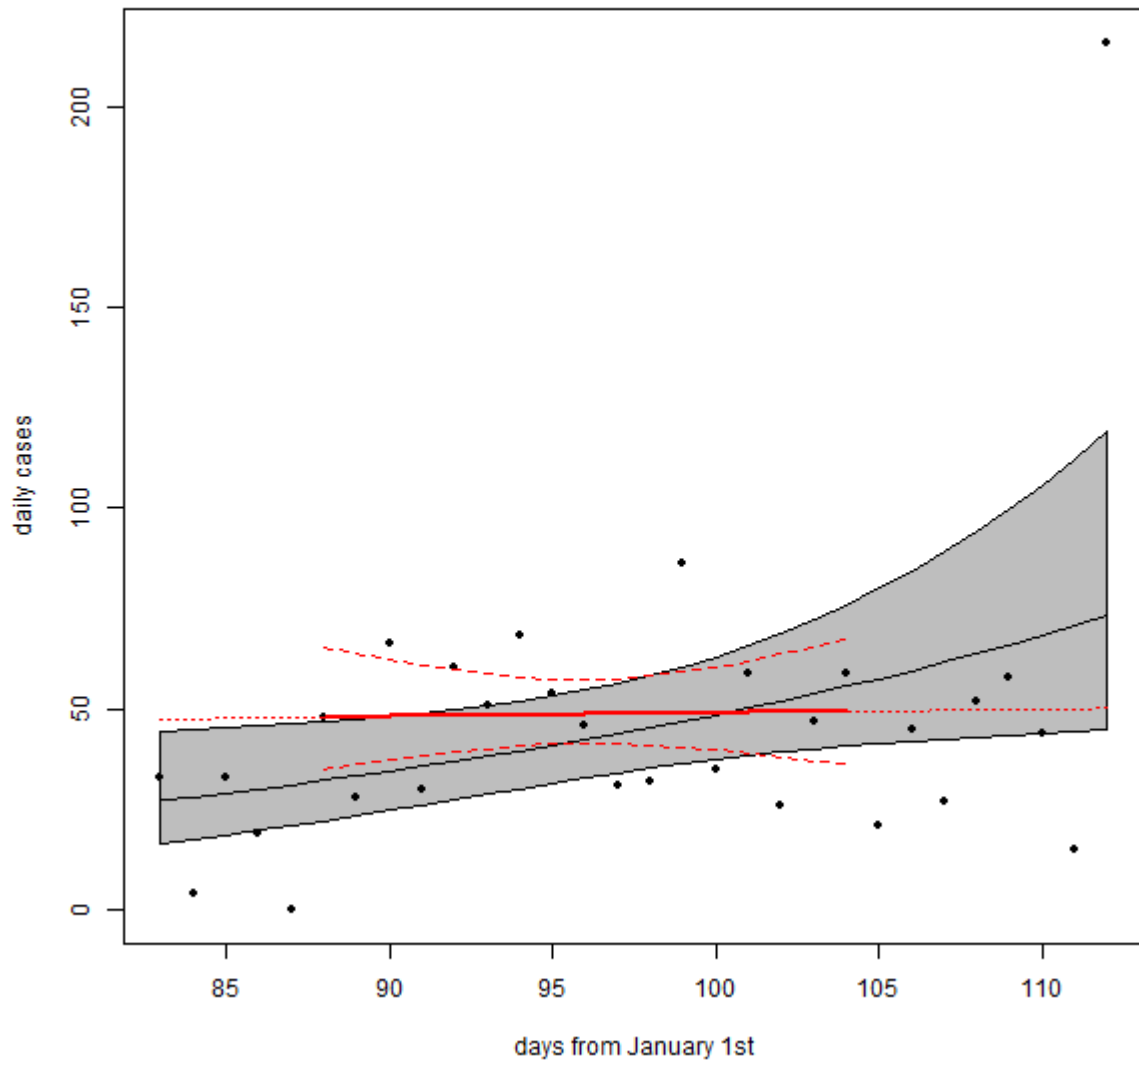

# Brazil

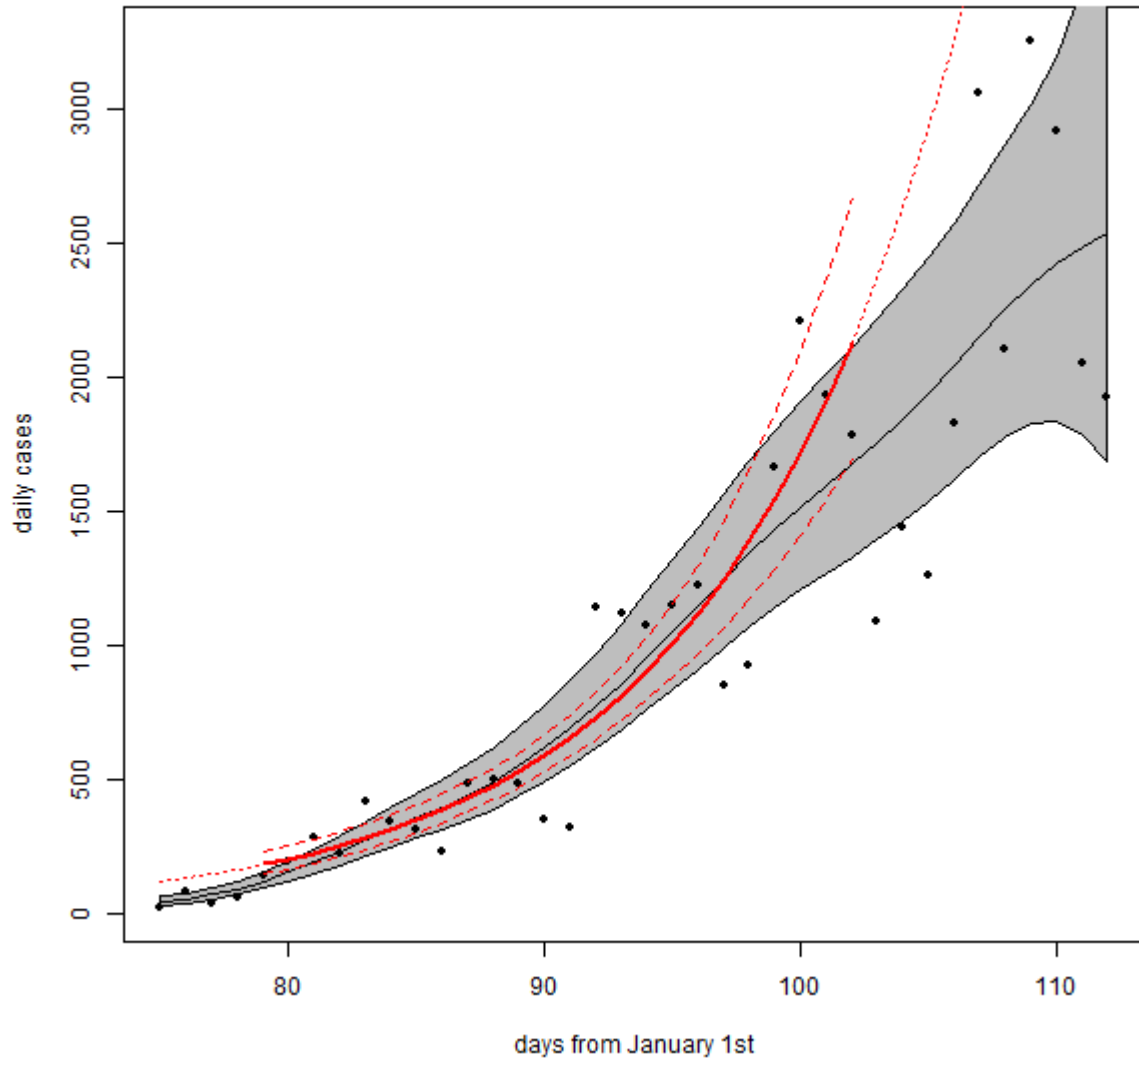

# Brazil

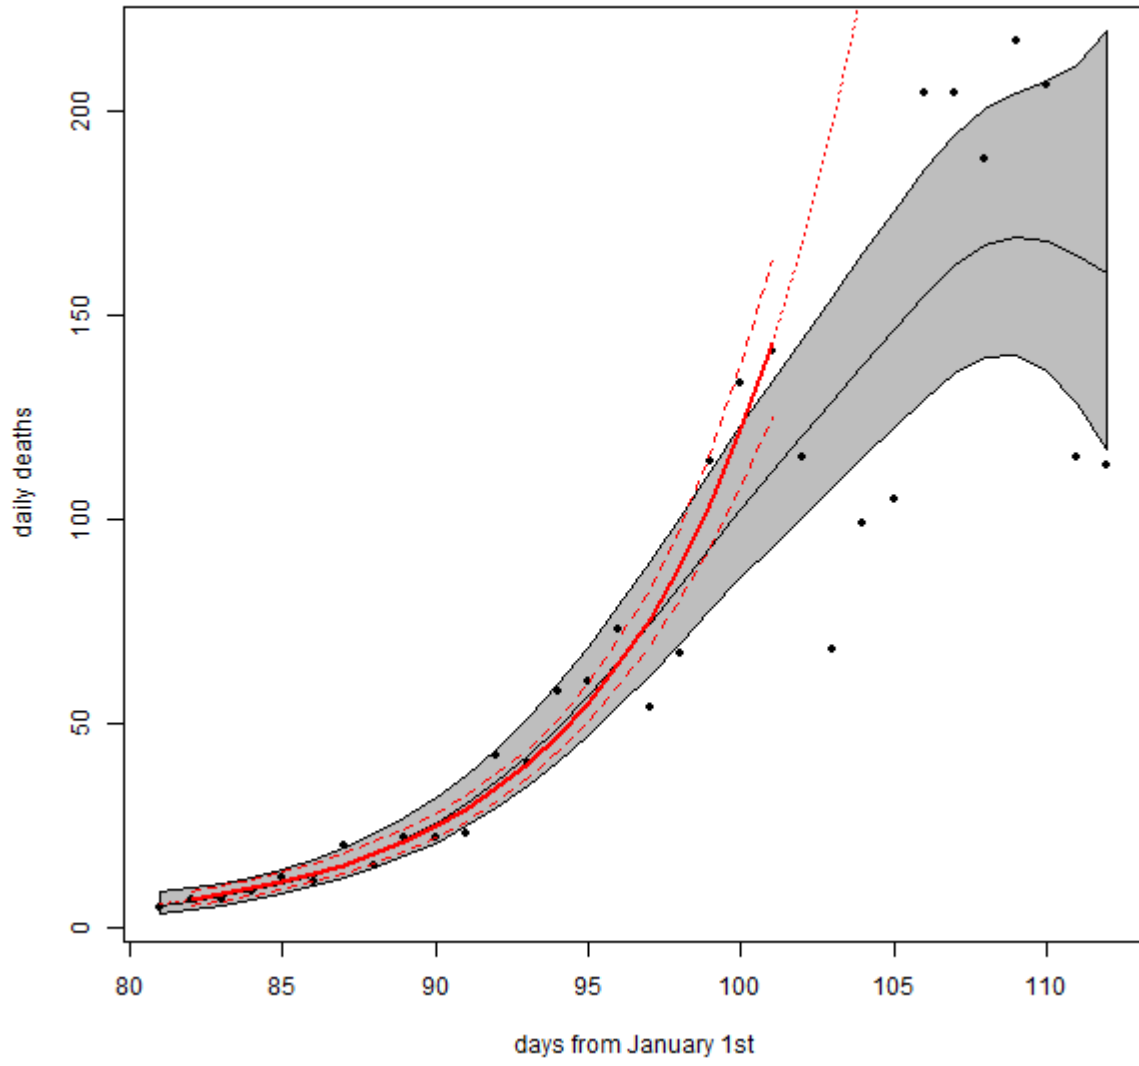

### Canada

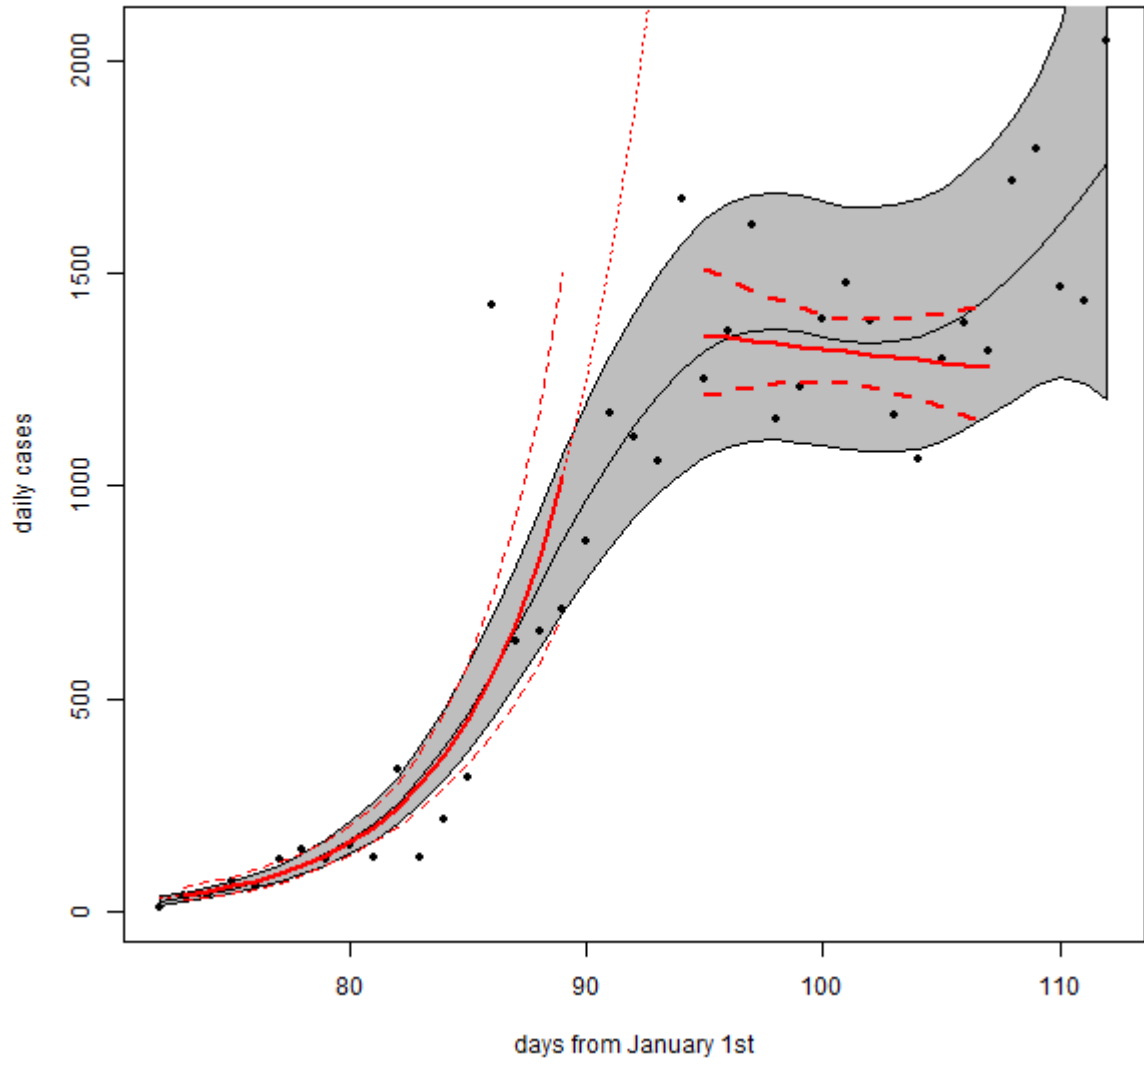



# Canada

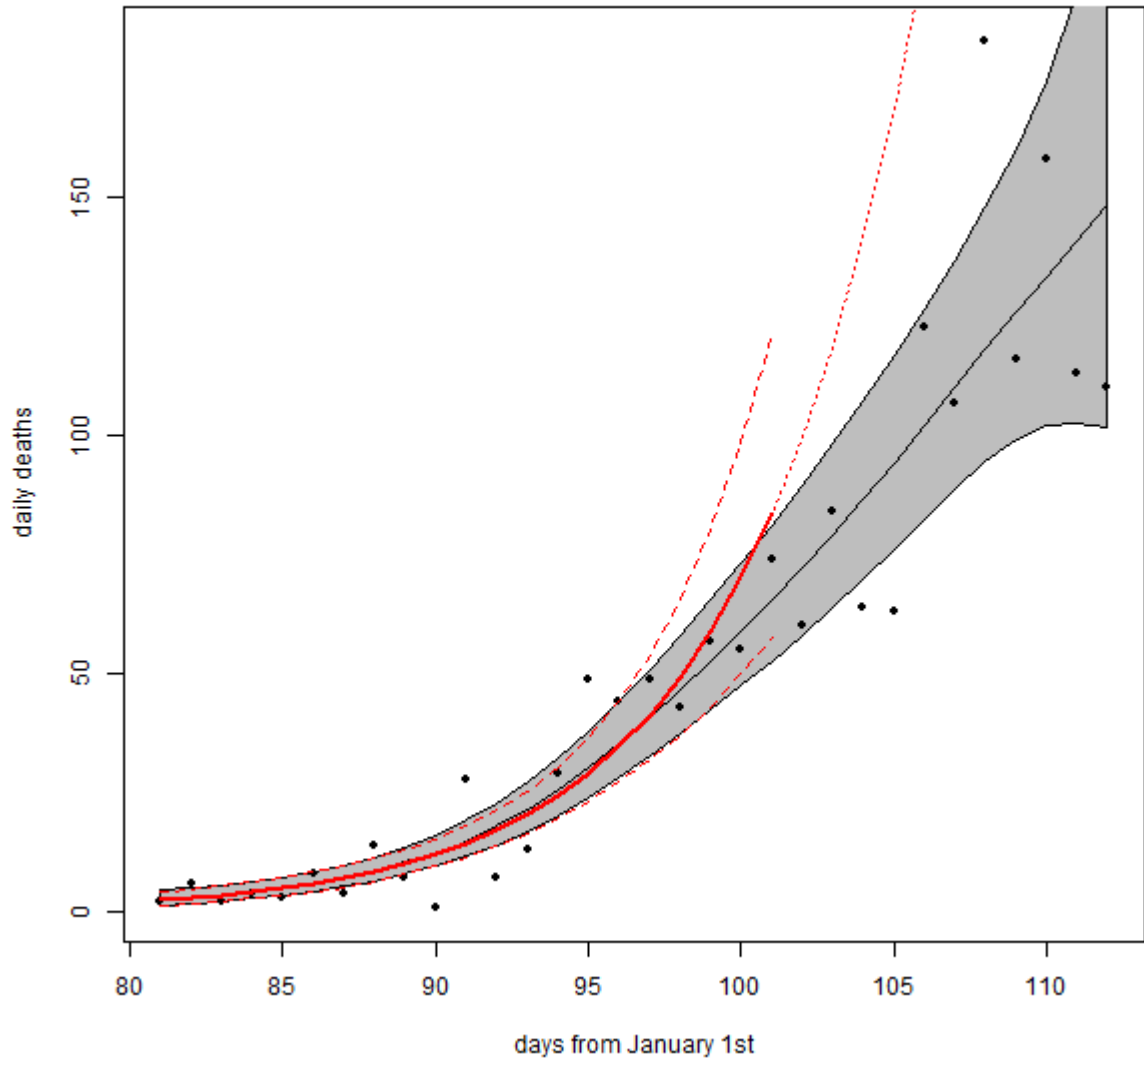

# Chile

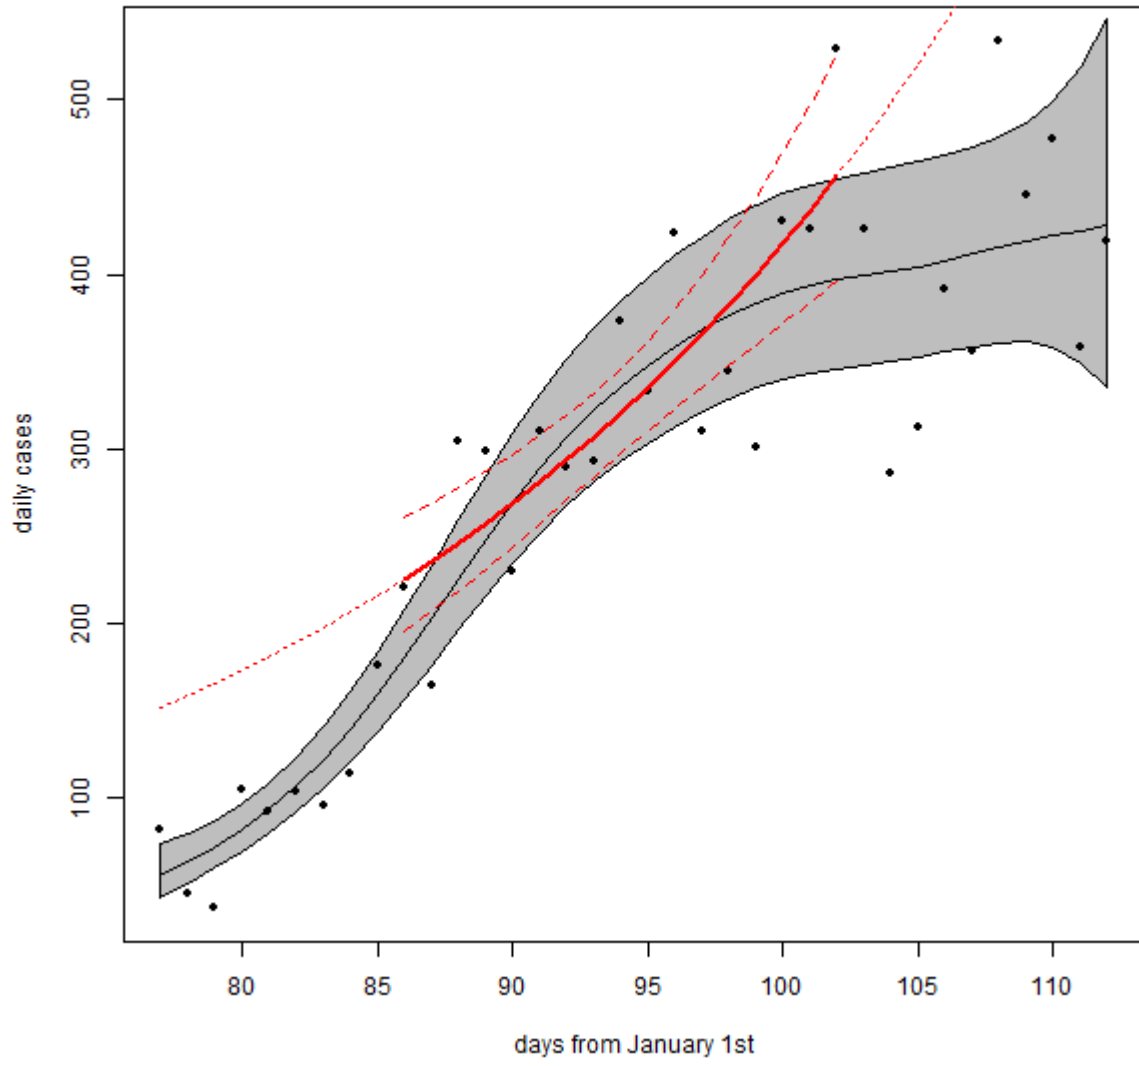

# Chile

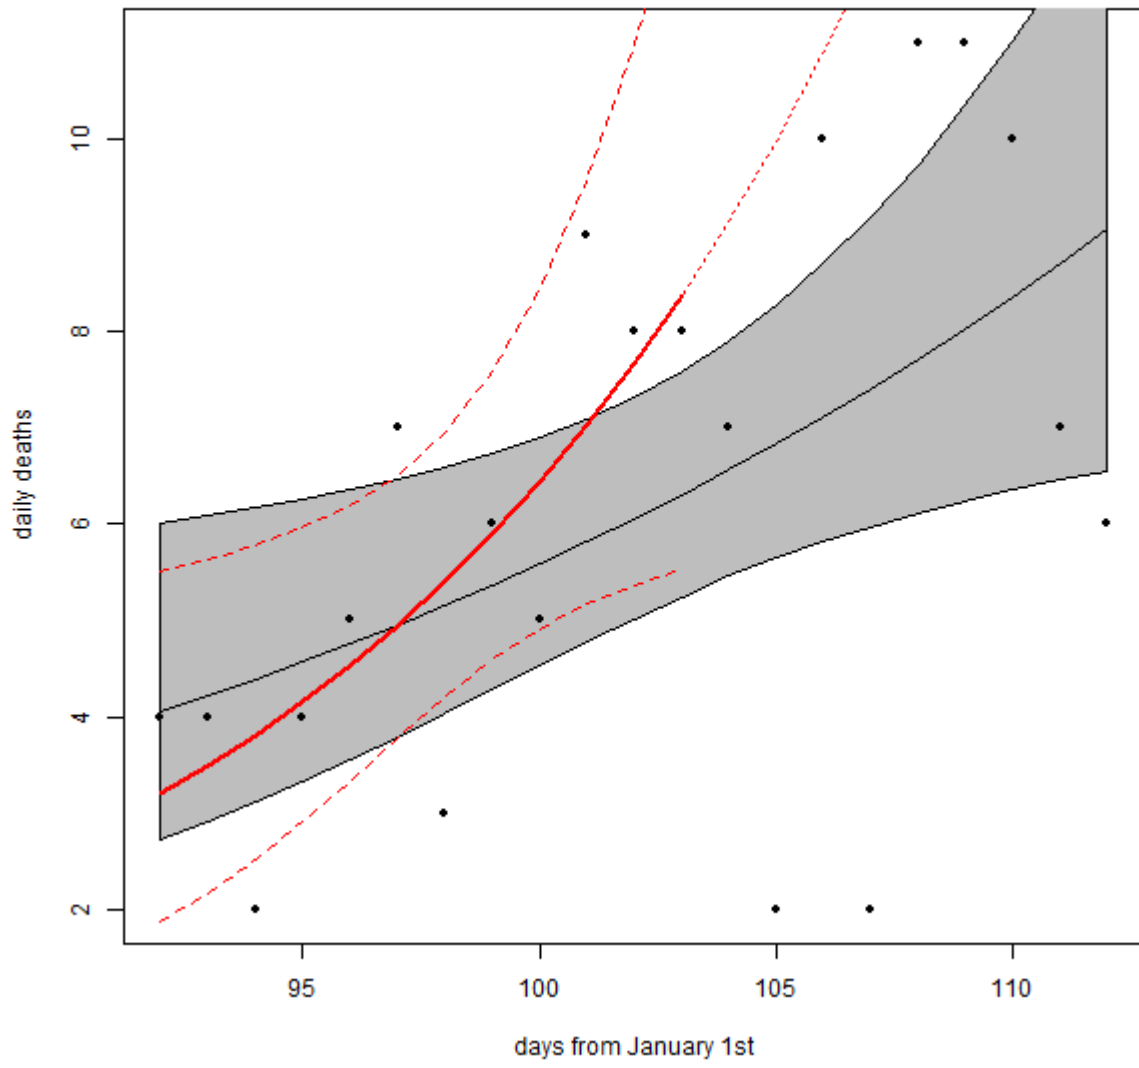

# China

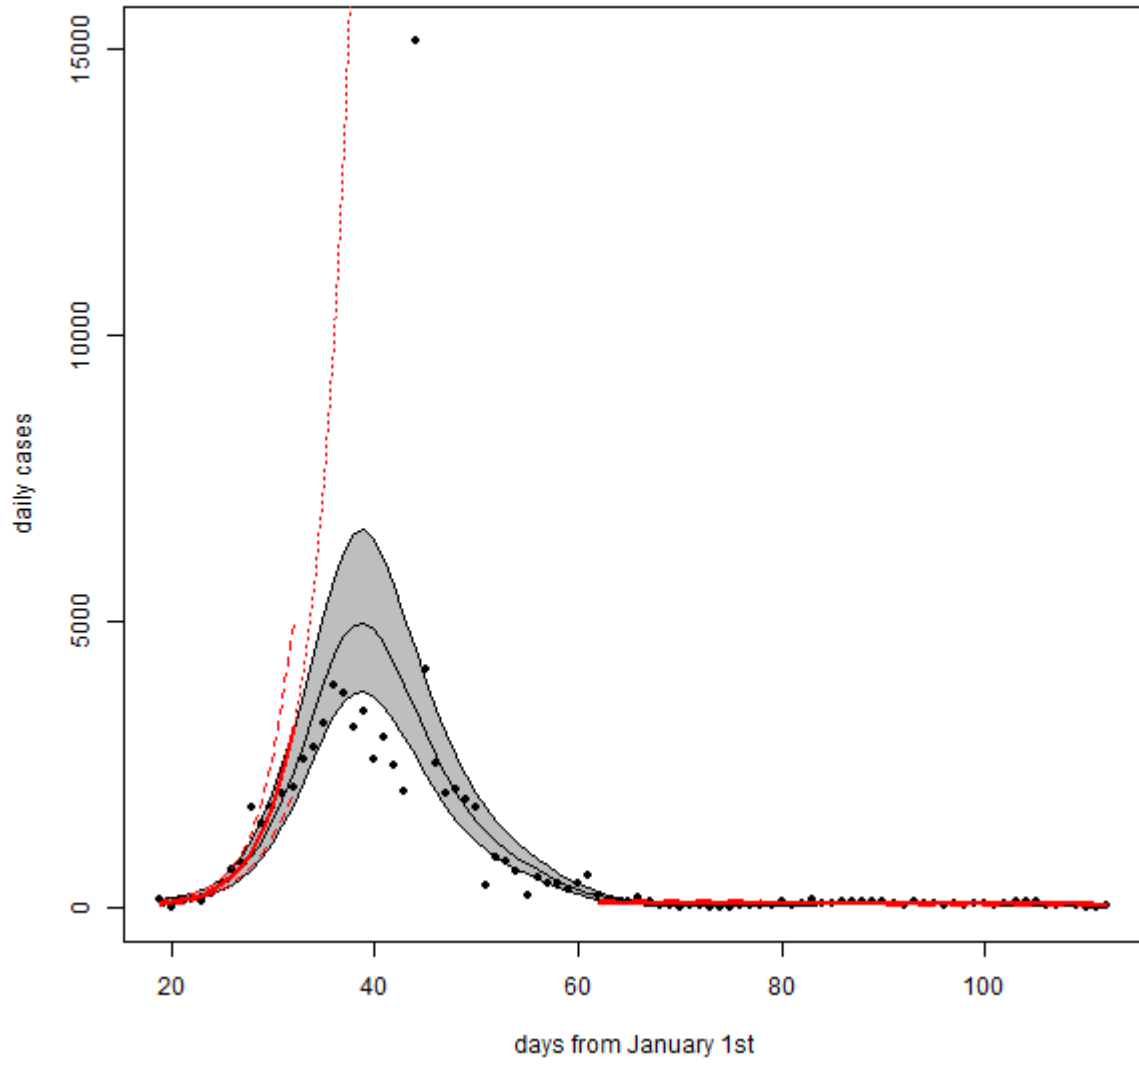

# China

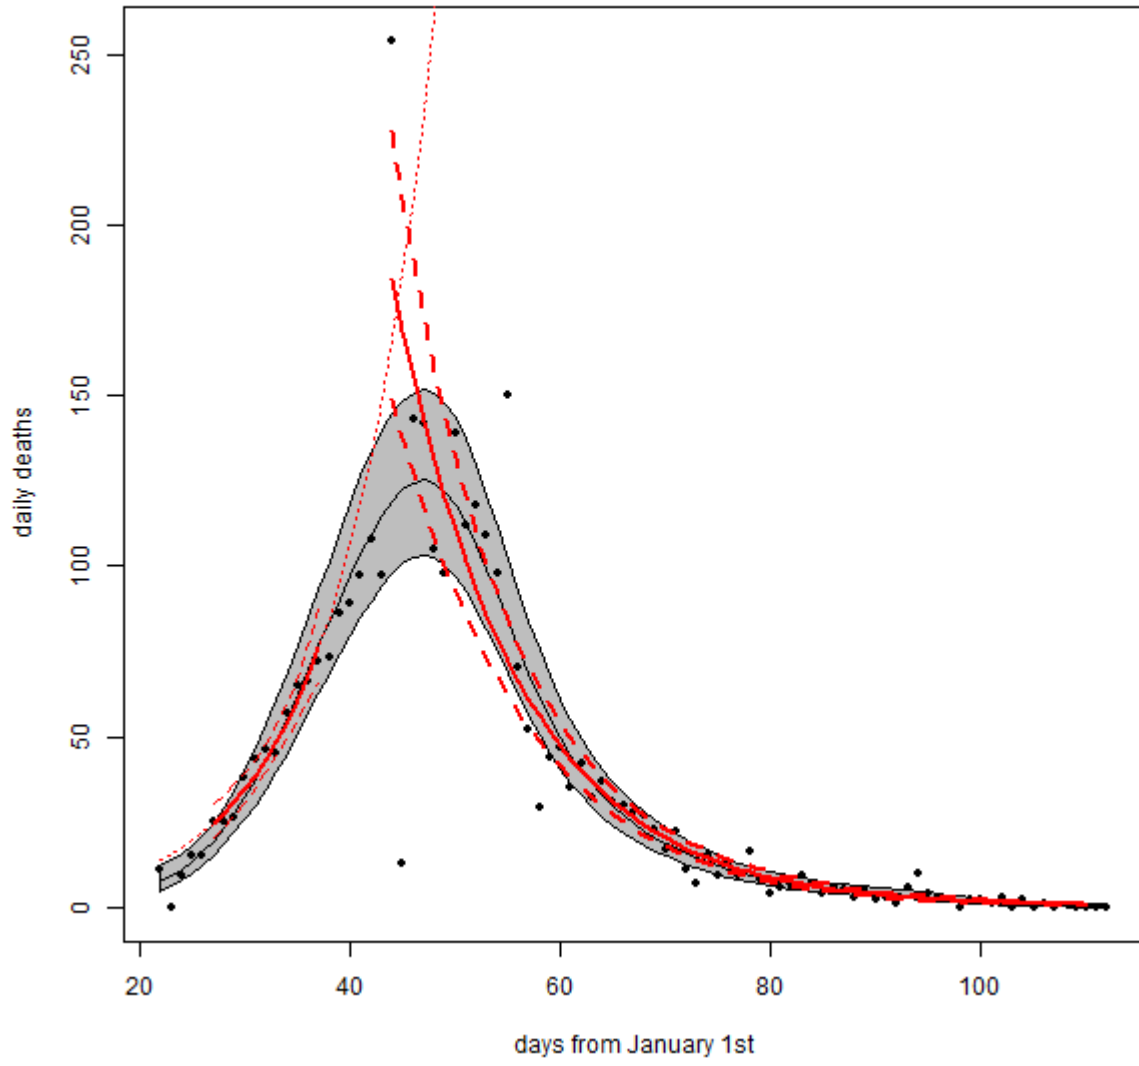

Colombia

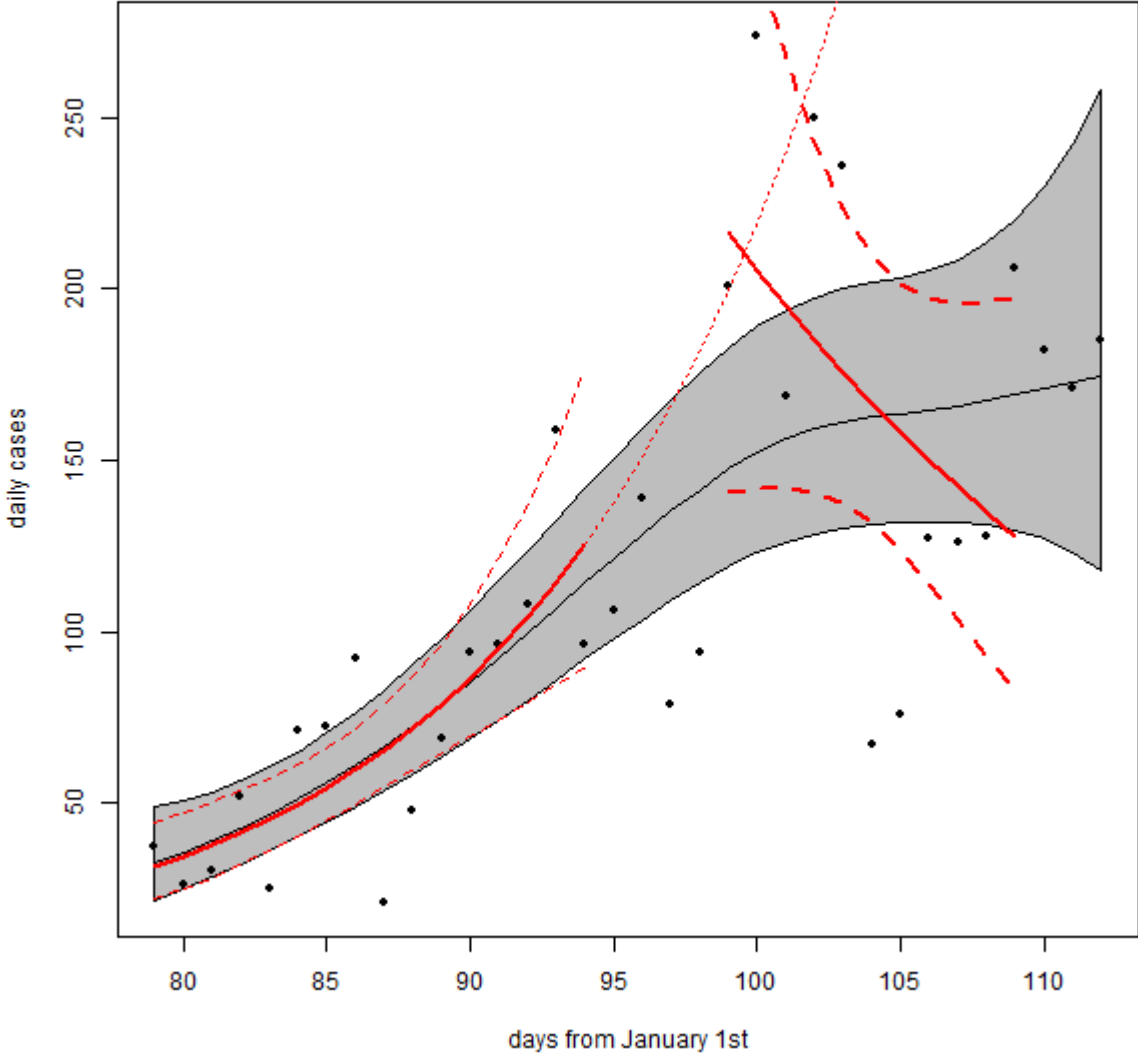

### Cuba

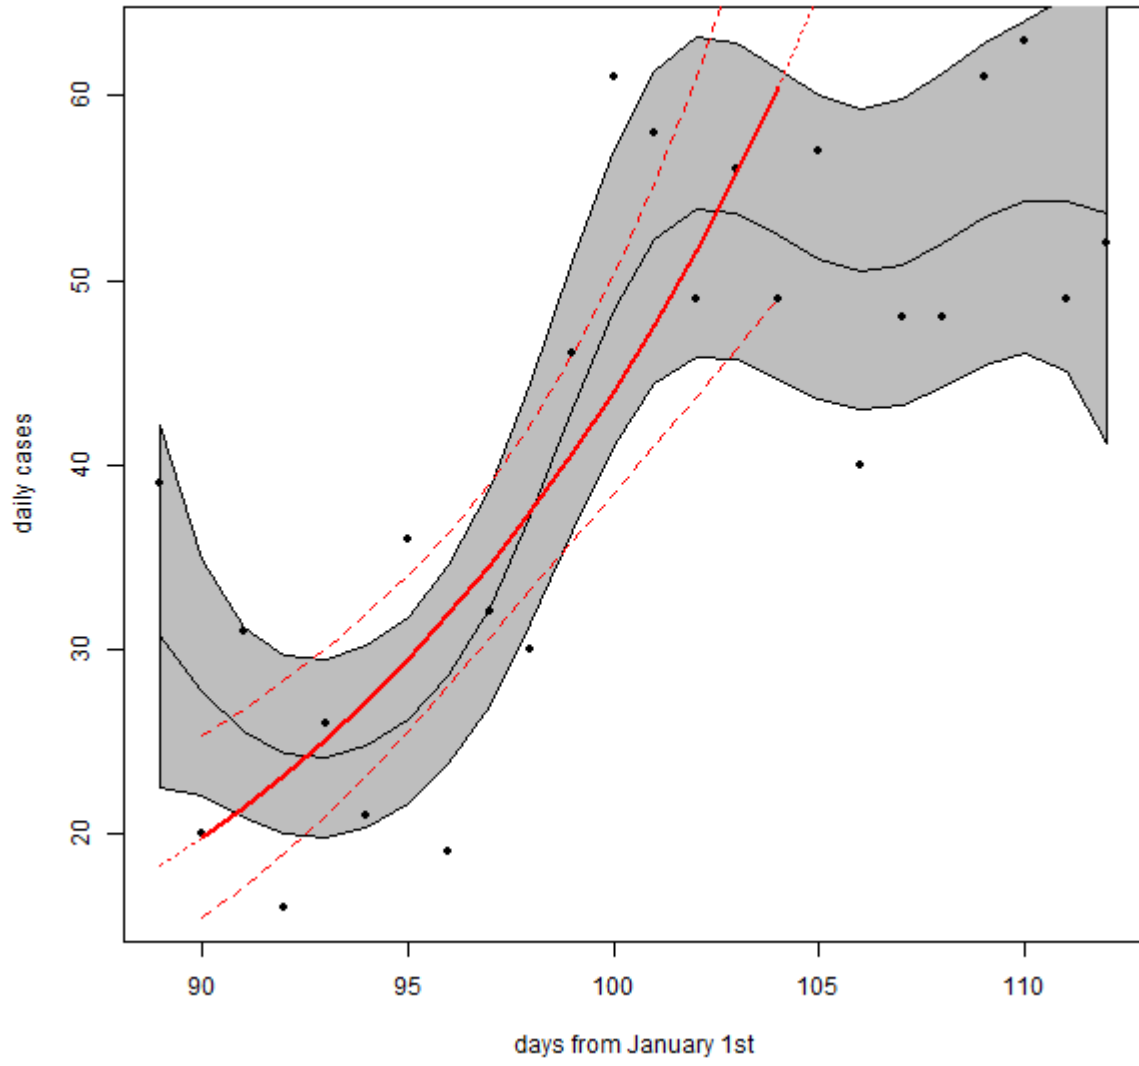

### Czechia

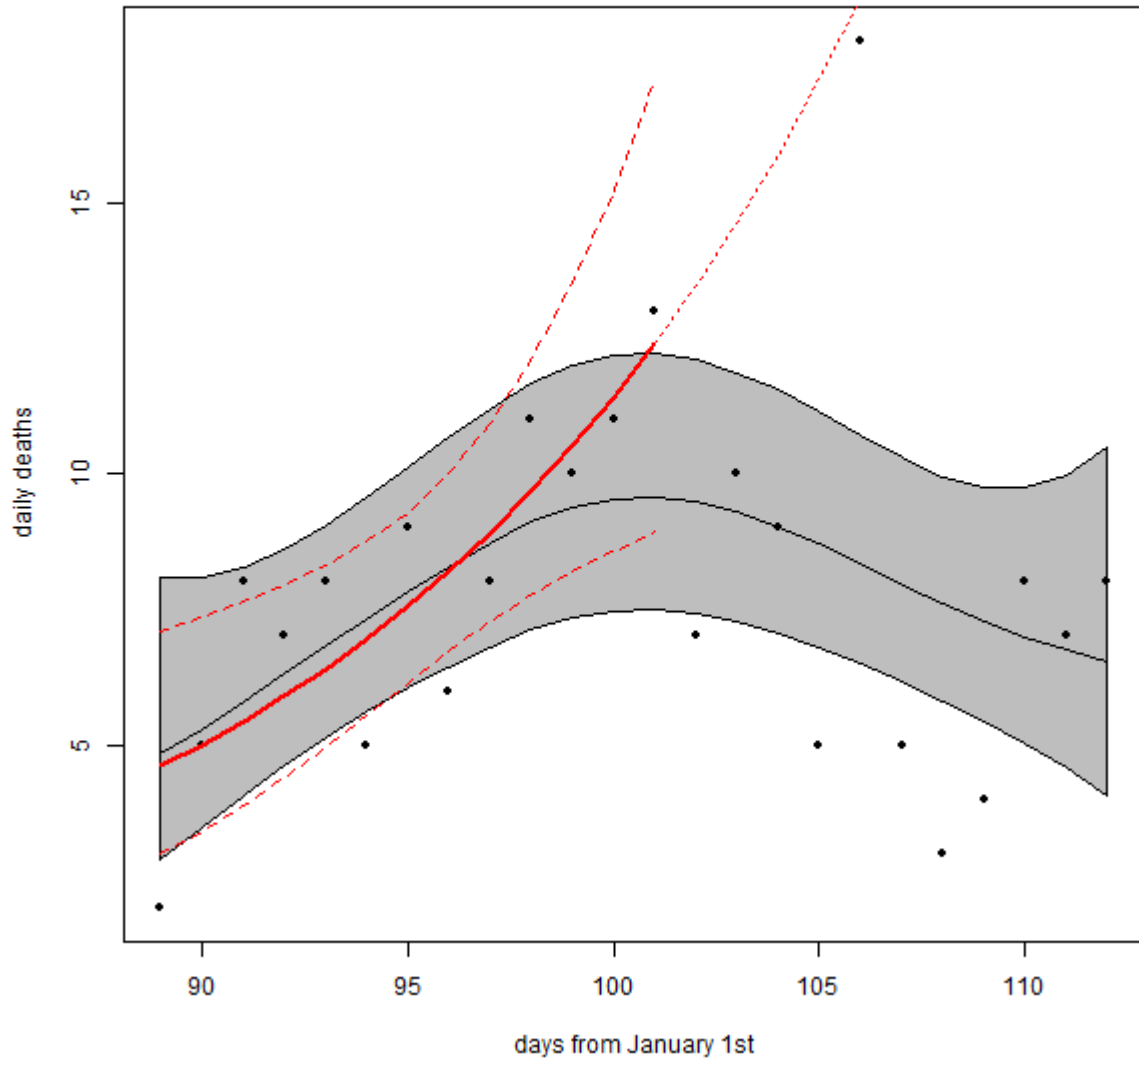



### Denmark

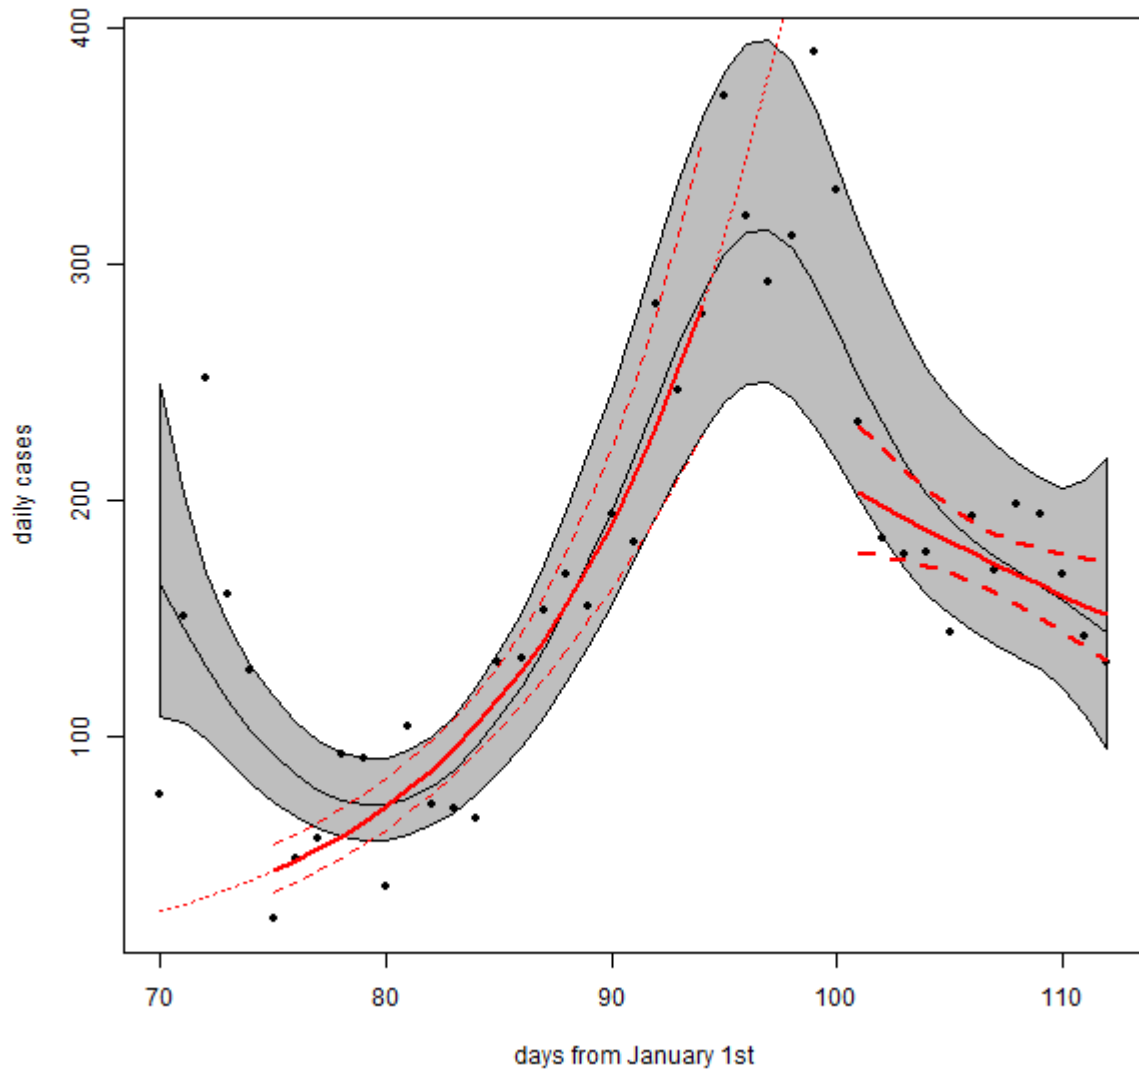

### Dominican\_Rep

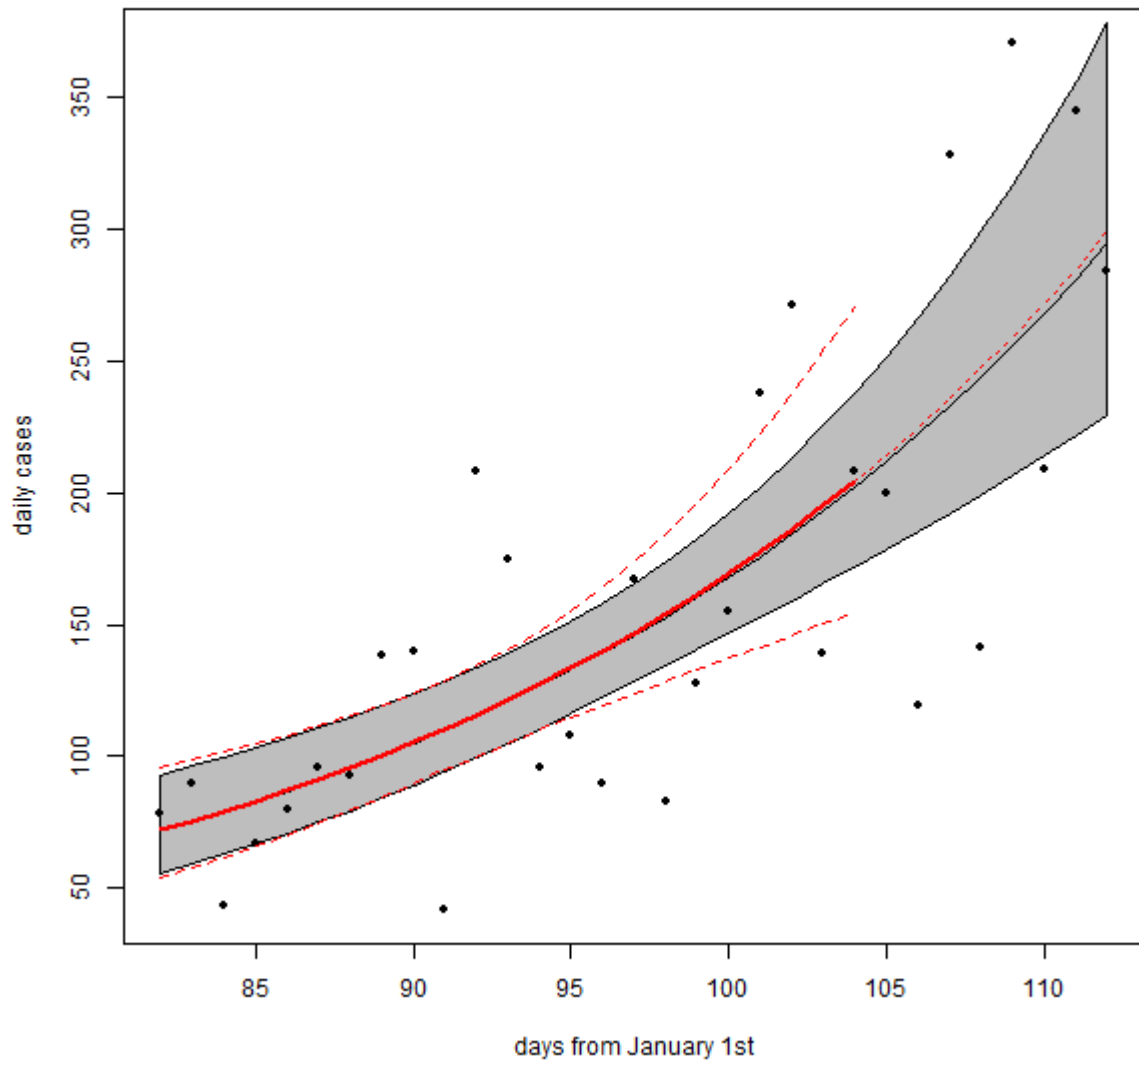

### Ecuador

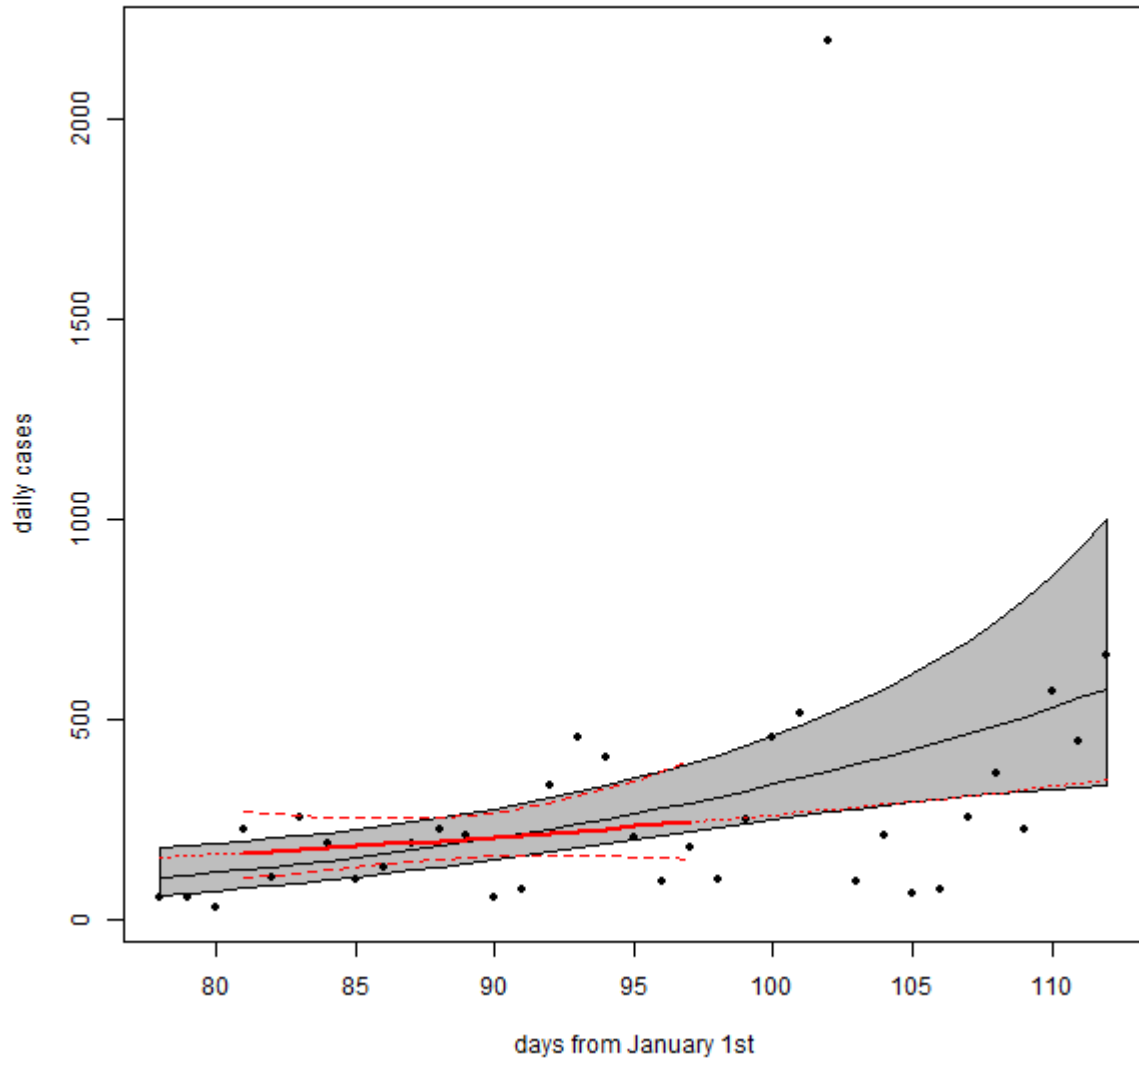

# Egypt

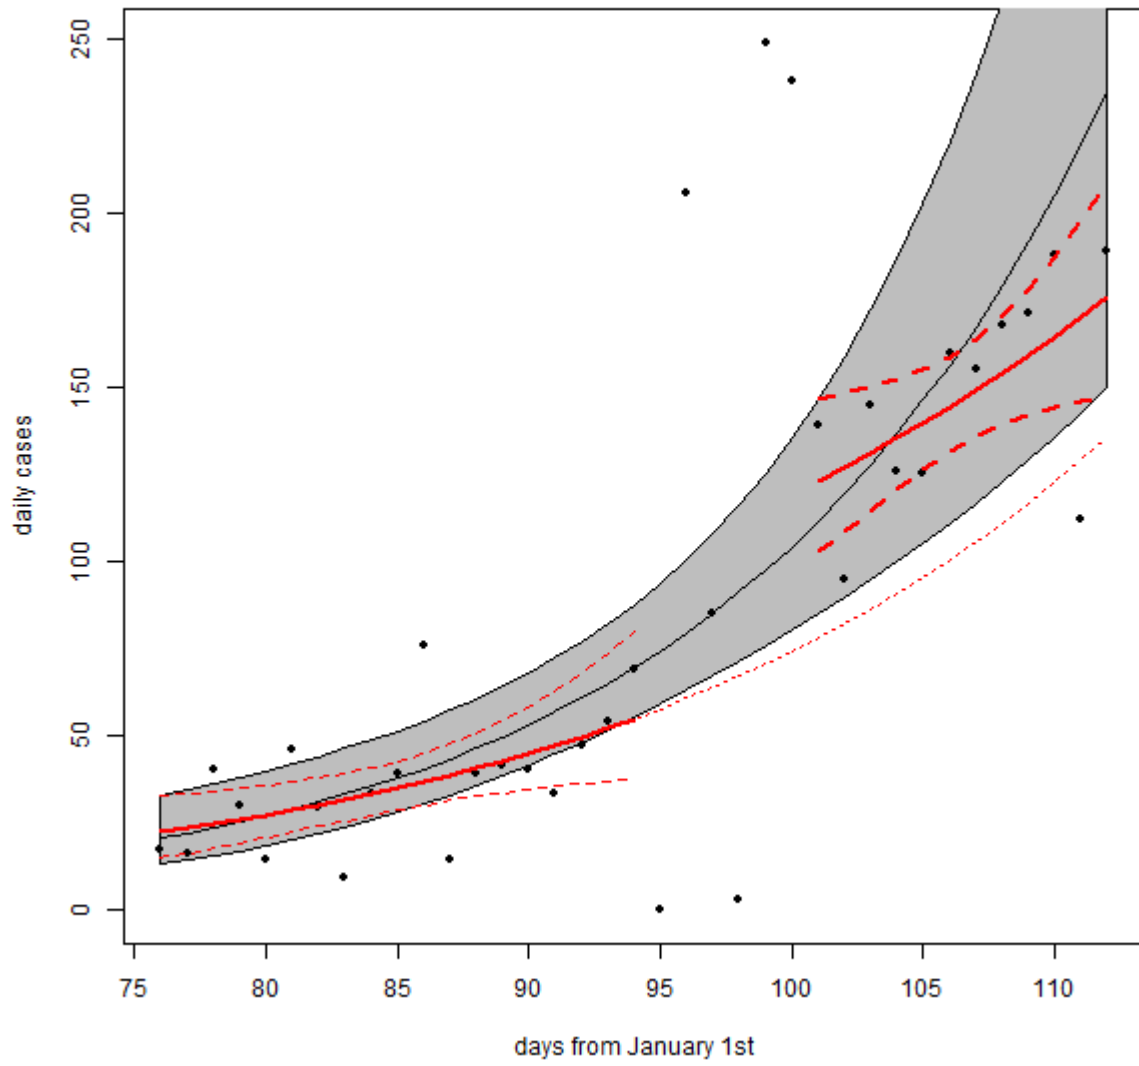

# Egypt

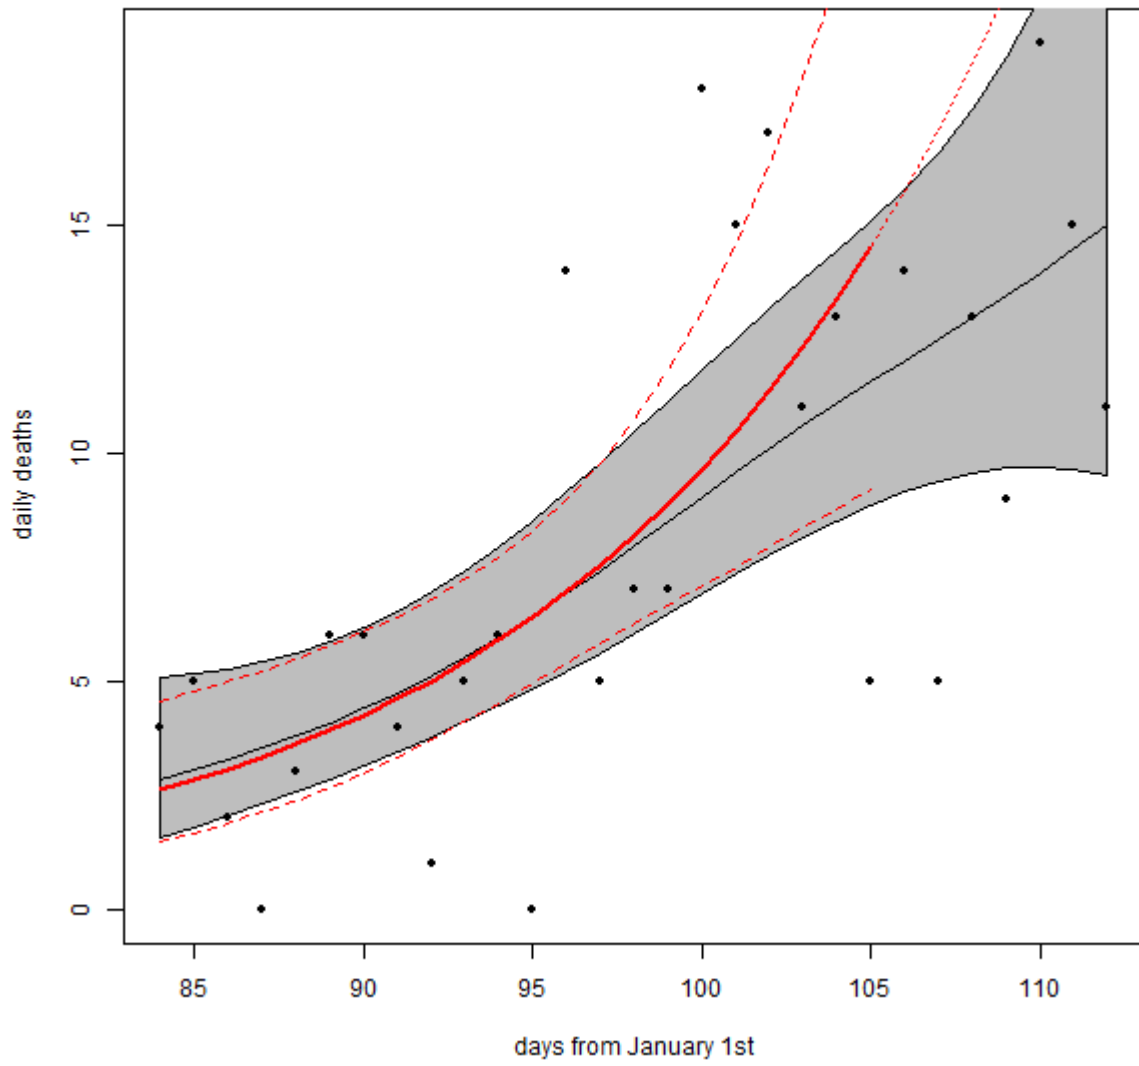

# Finland

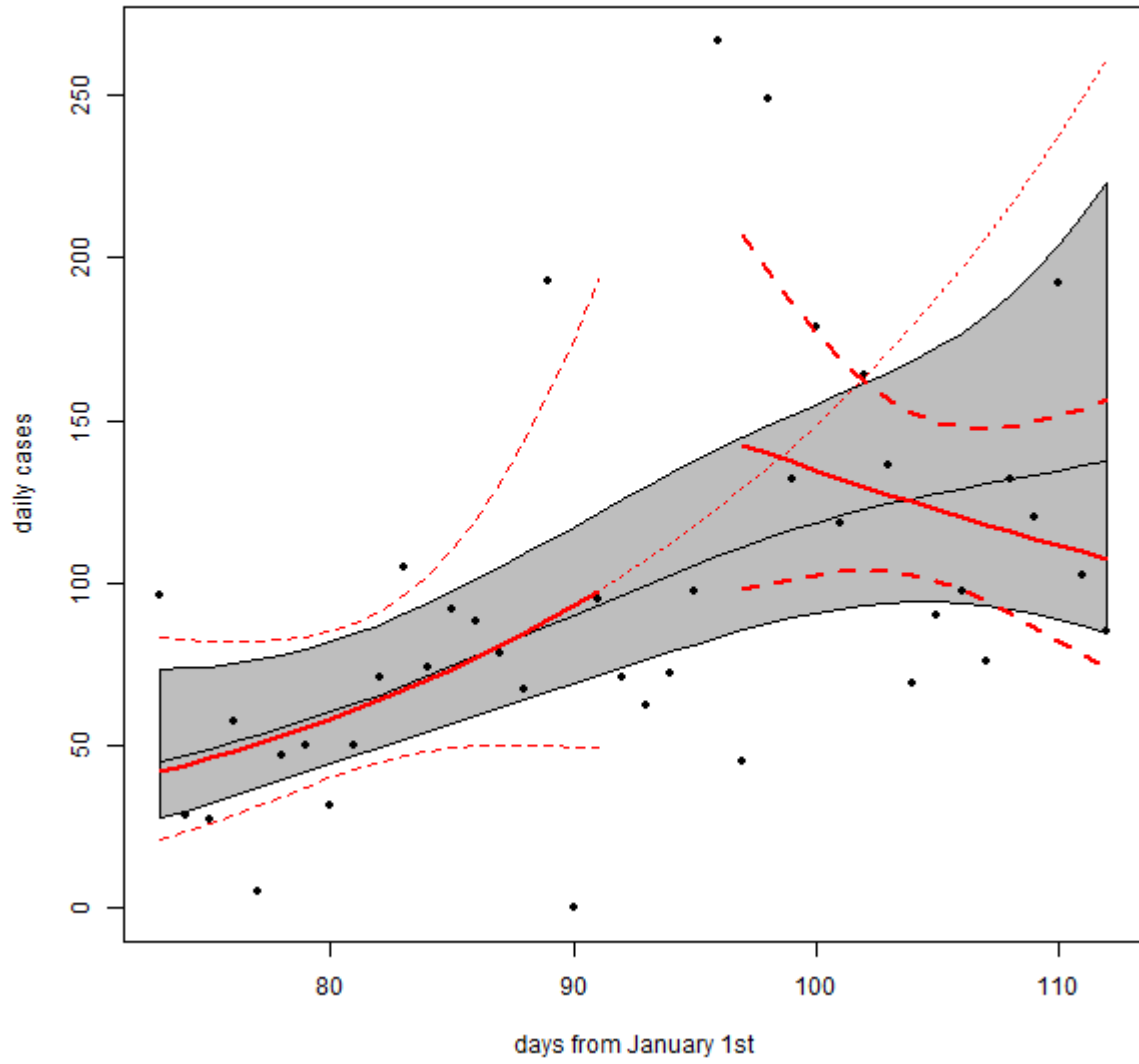

# France

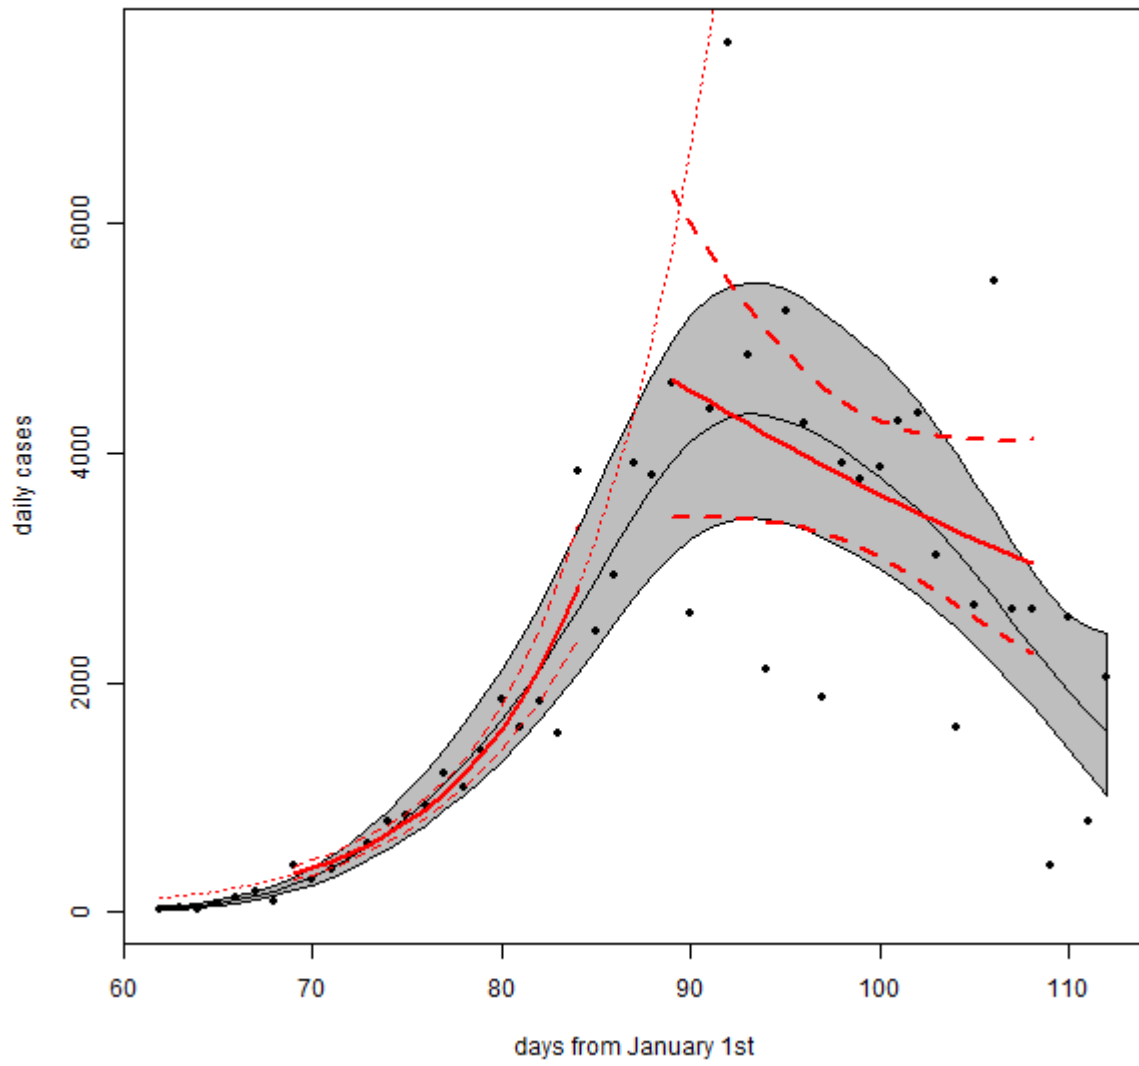

# France

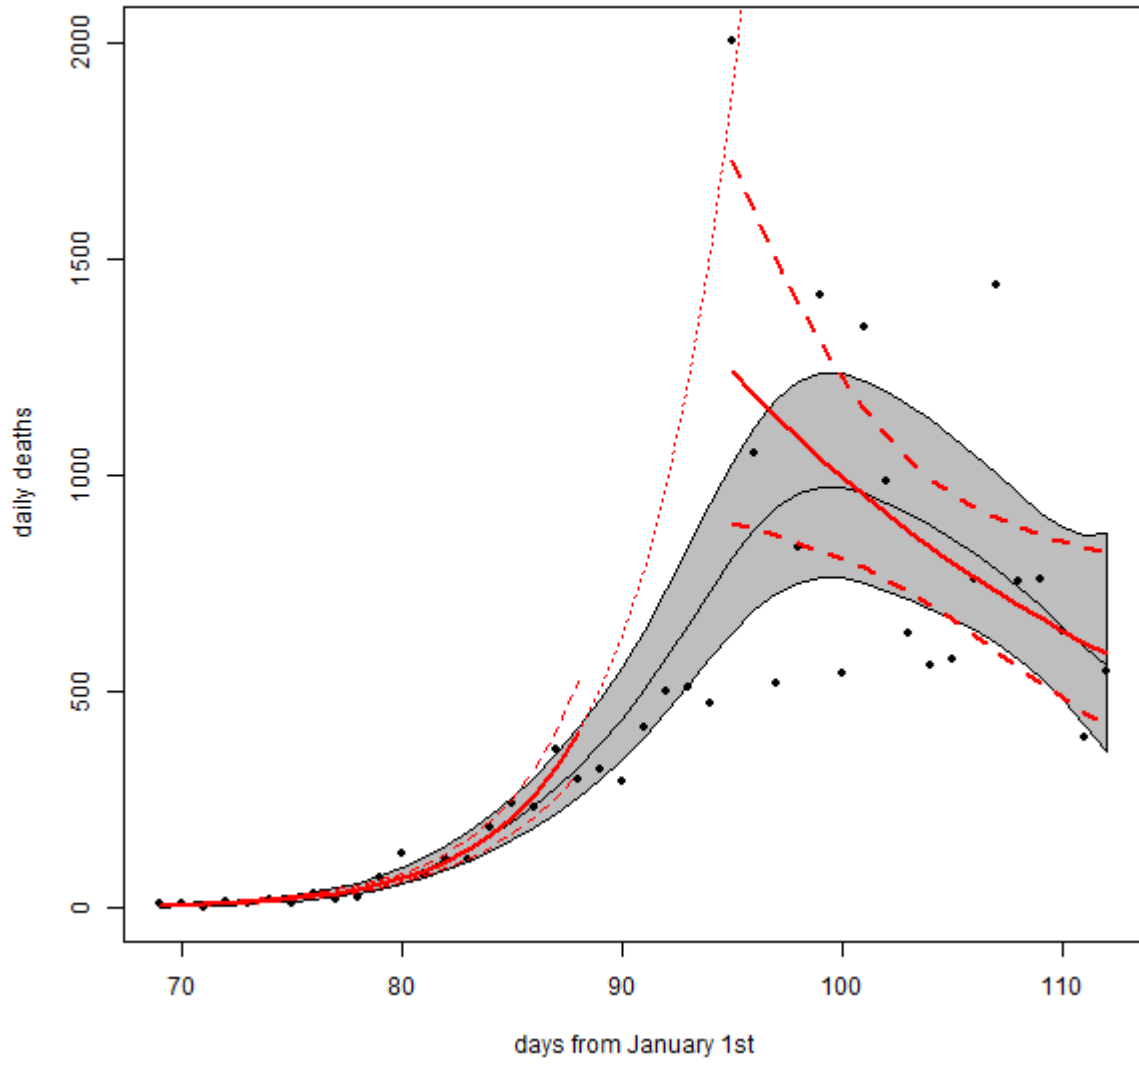



### Germany

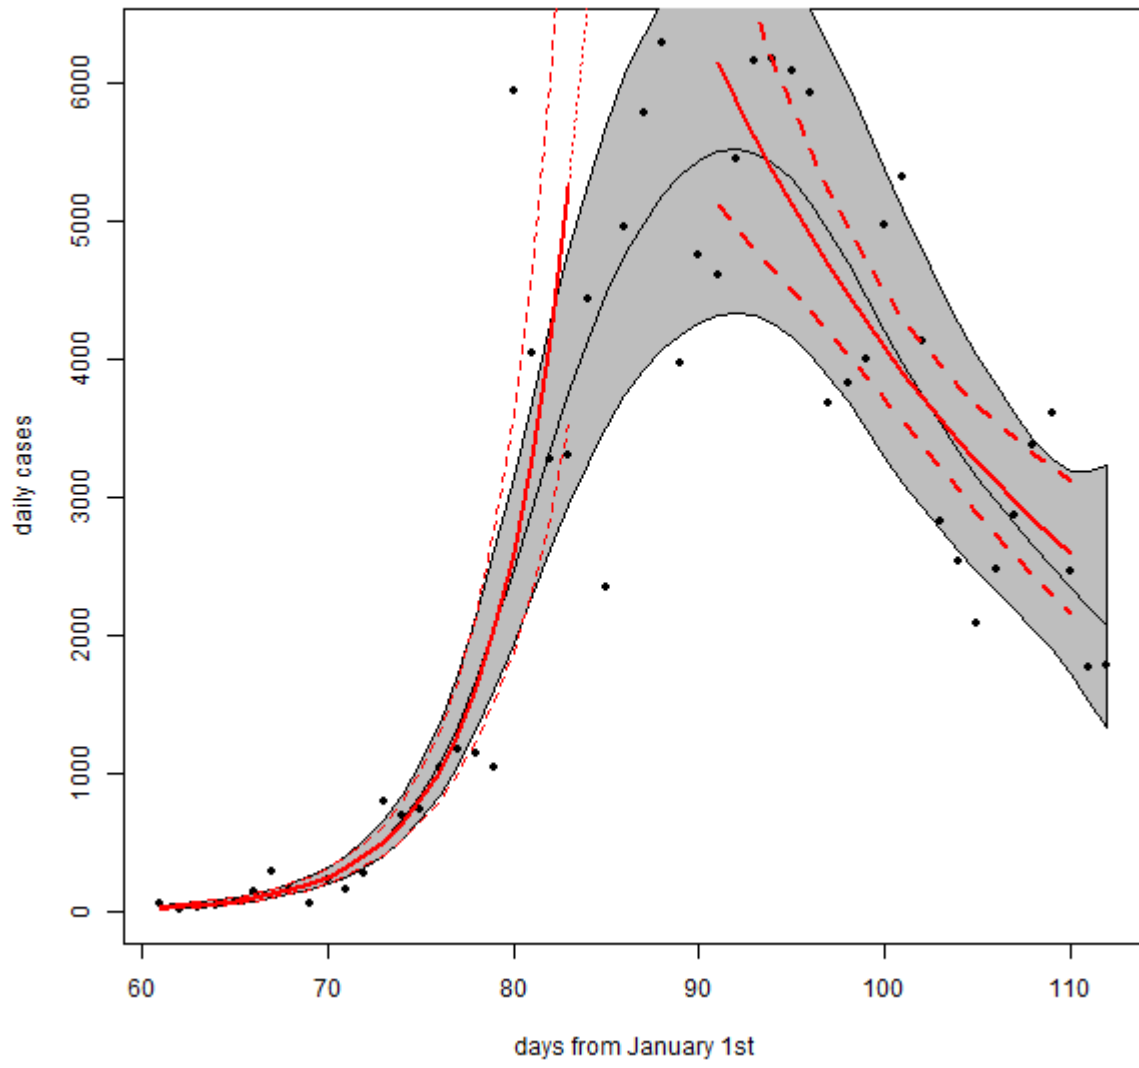

### Germany

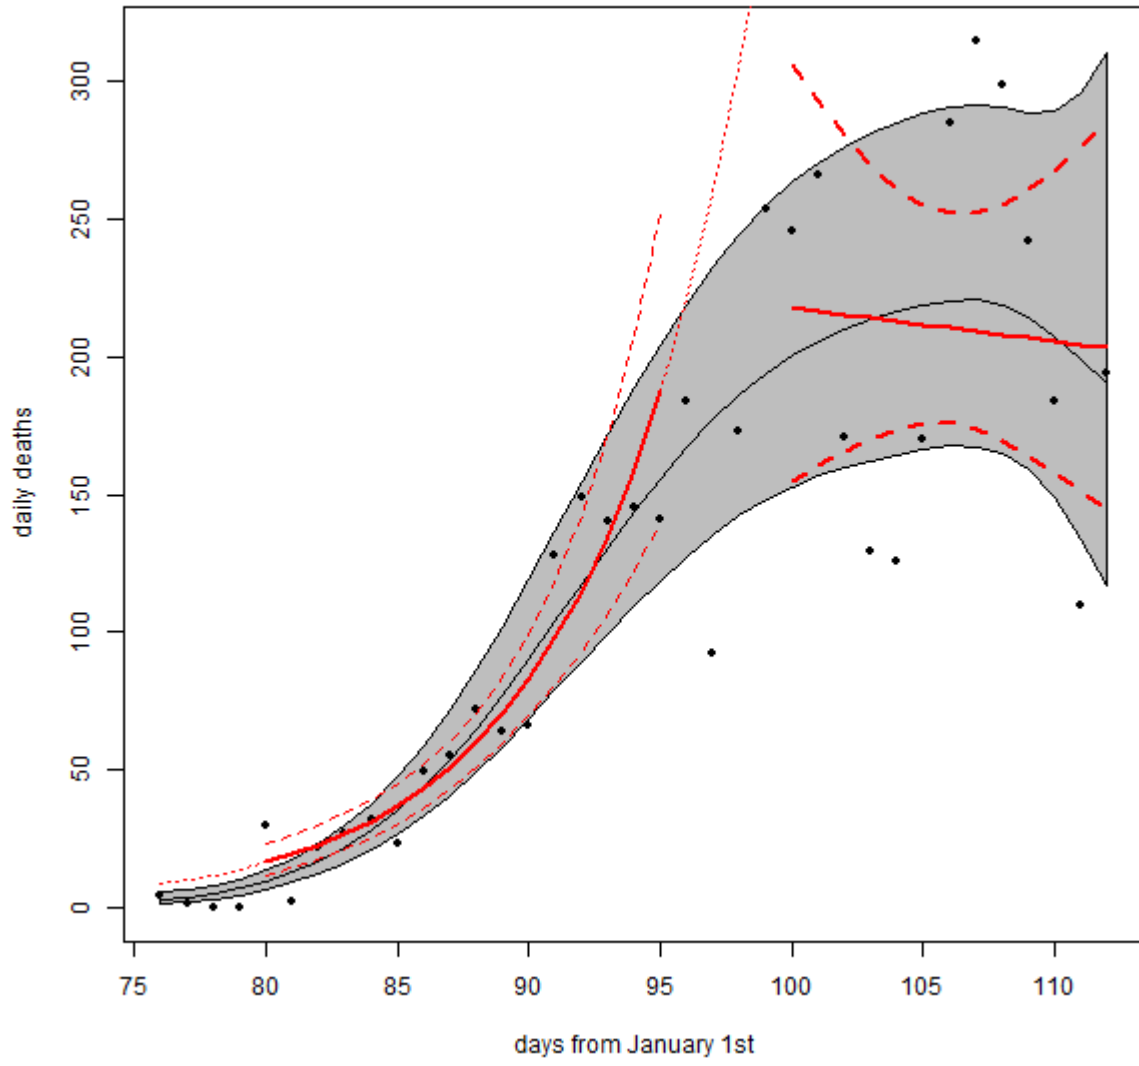

# Ghana

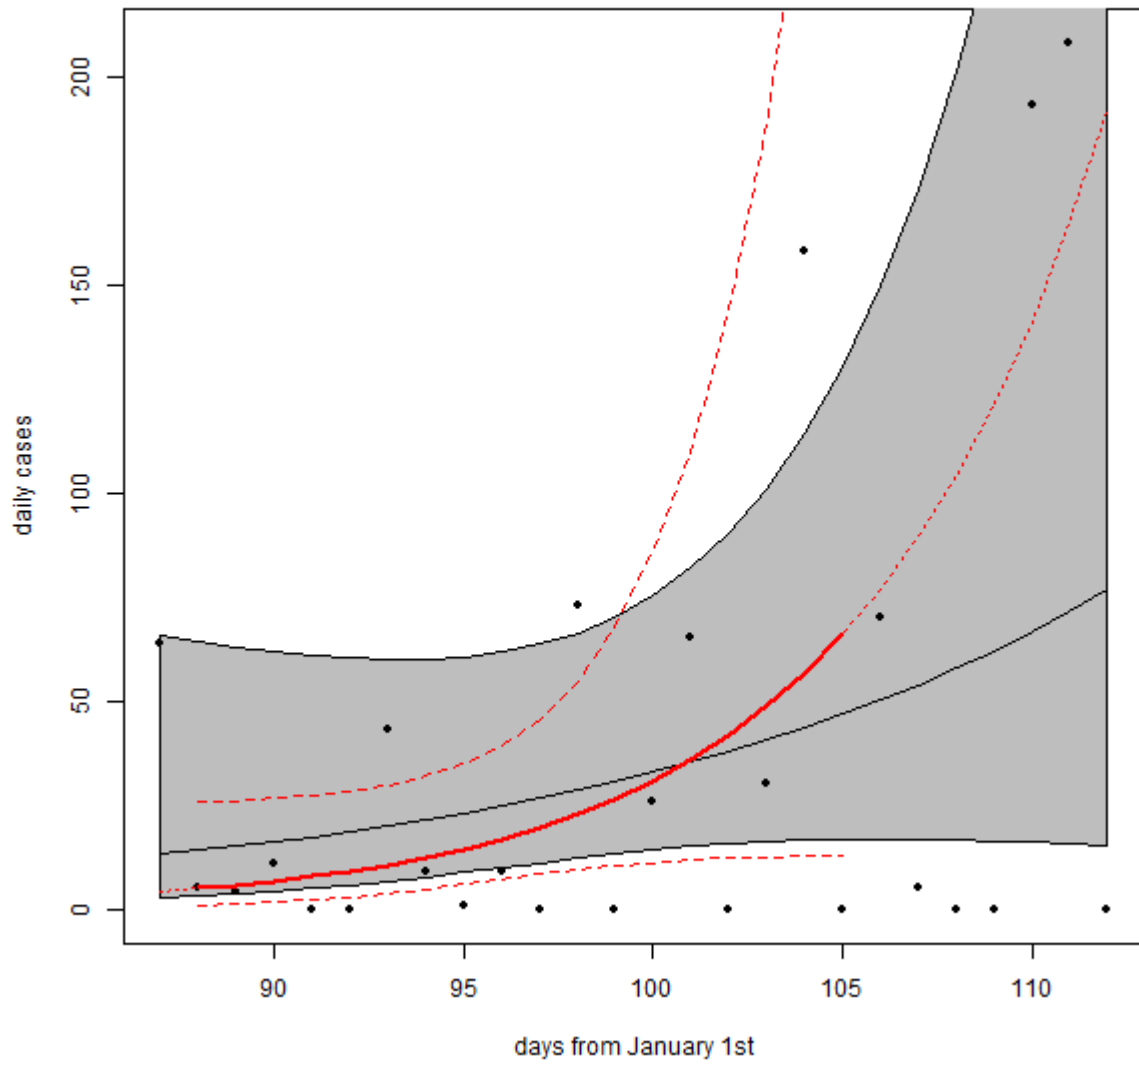

# Greece

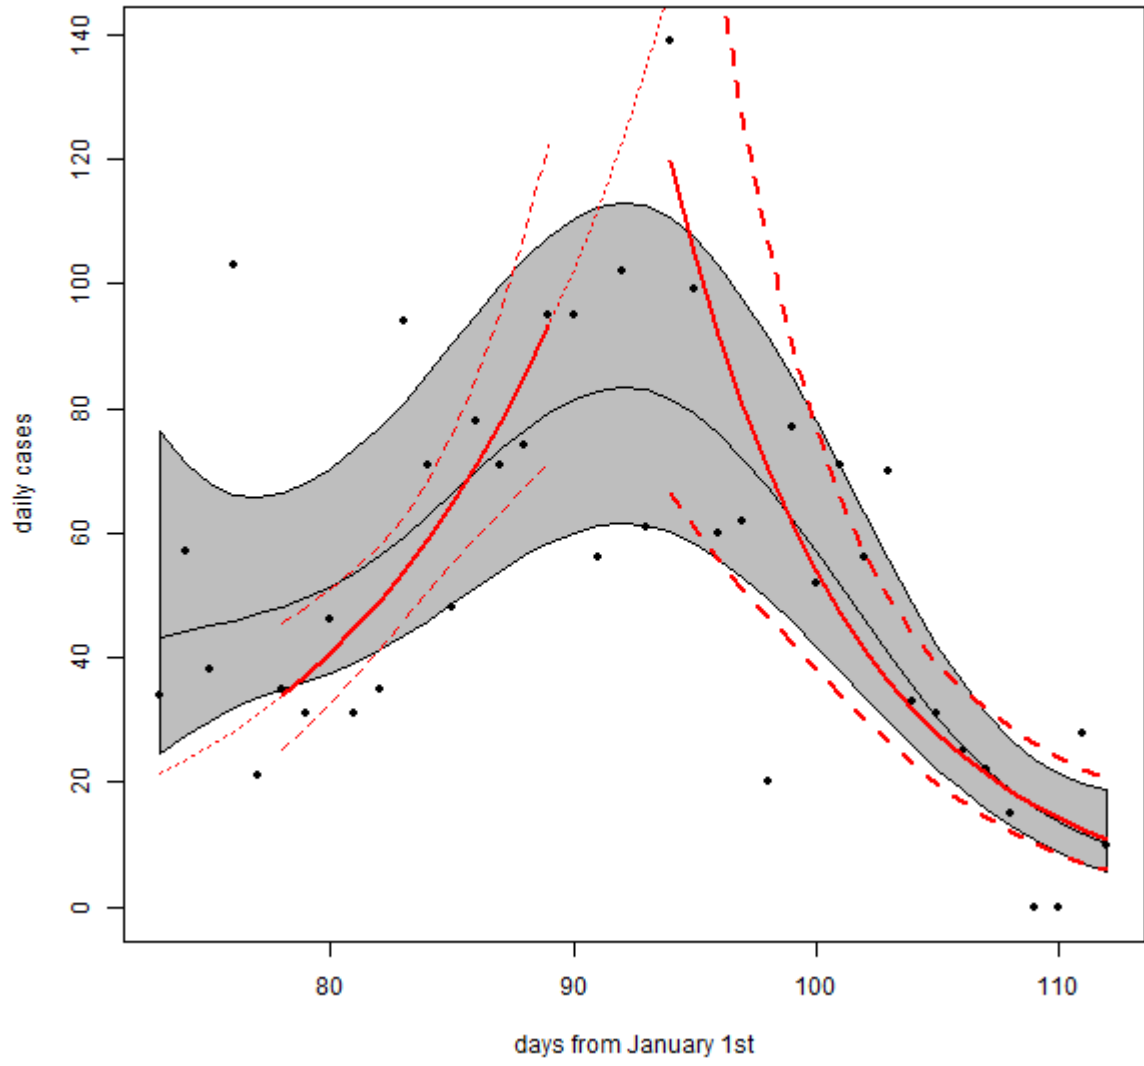

# Hungary

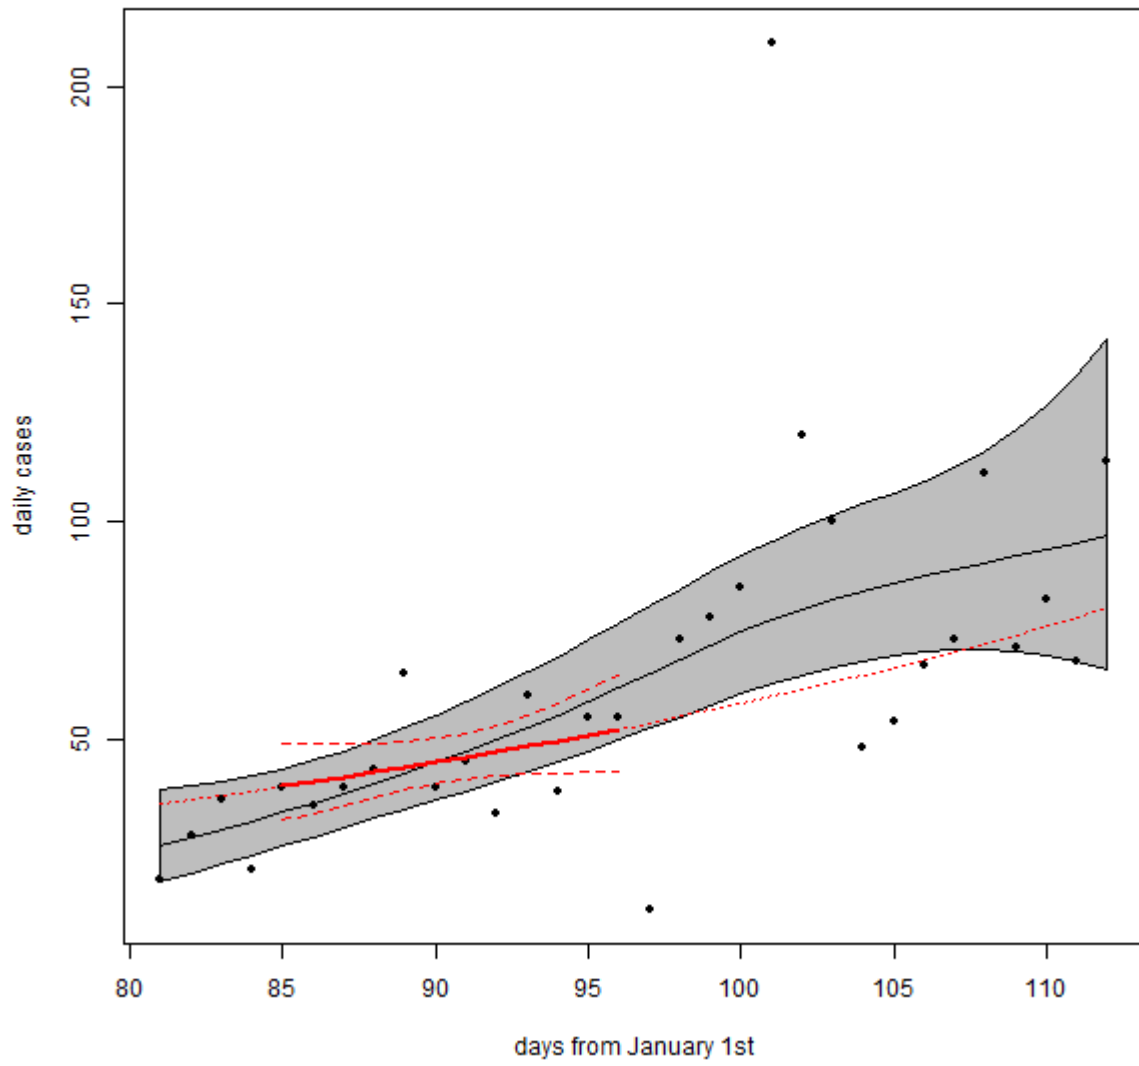

### Hungary

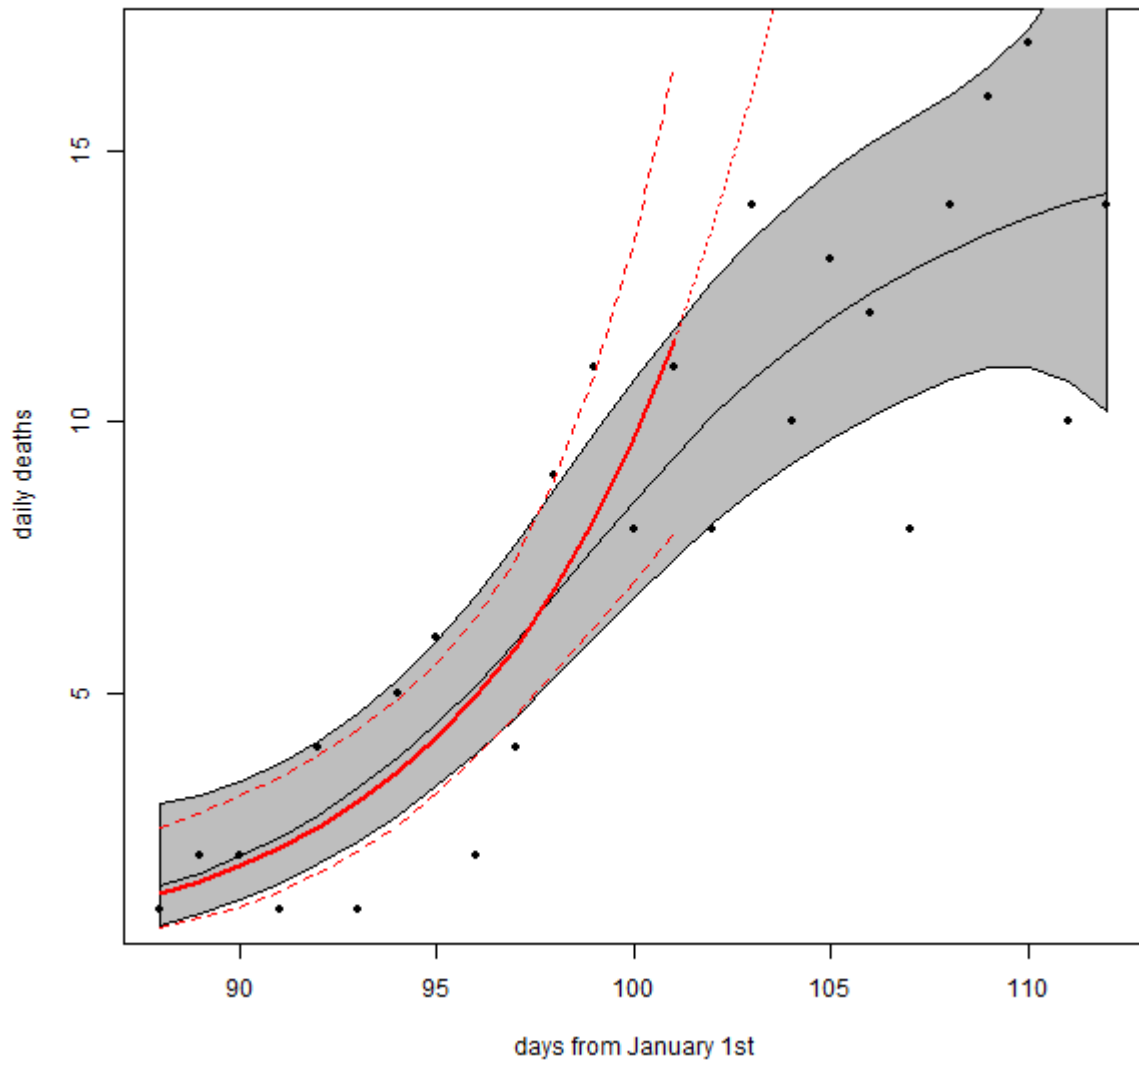

# Iceland

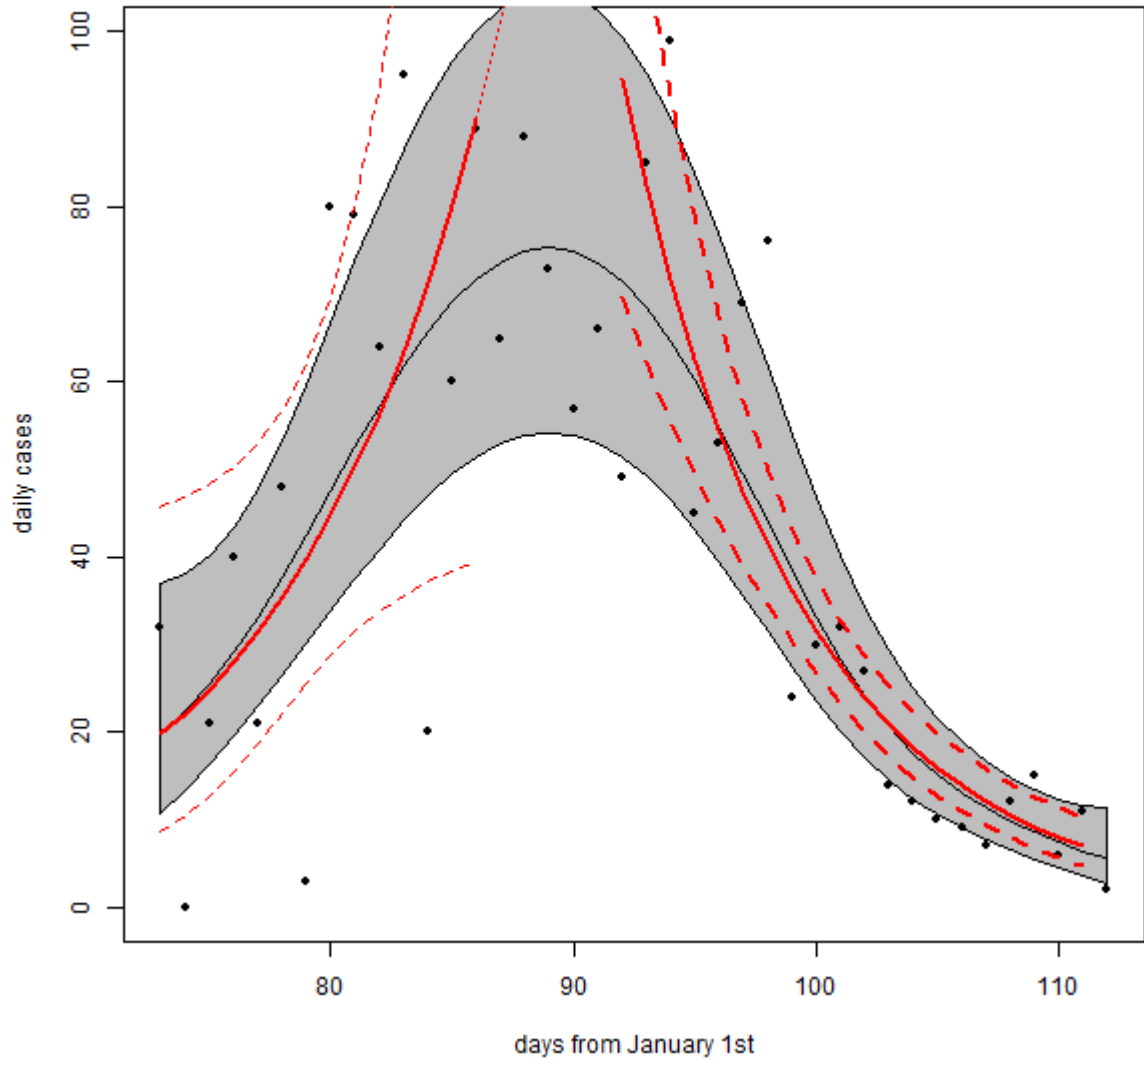

# India

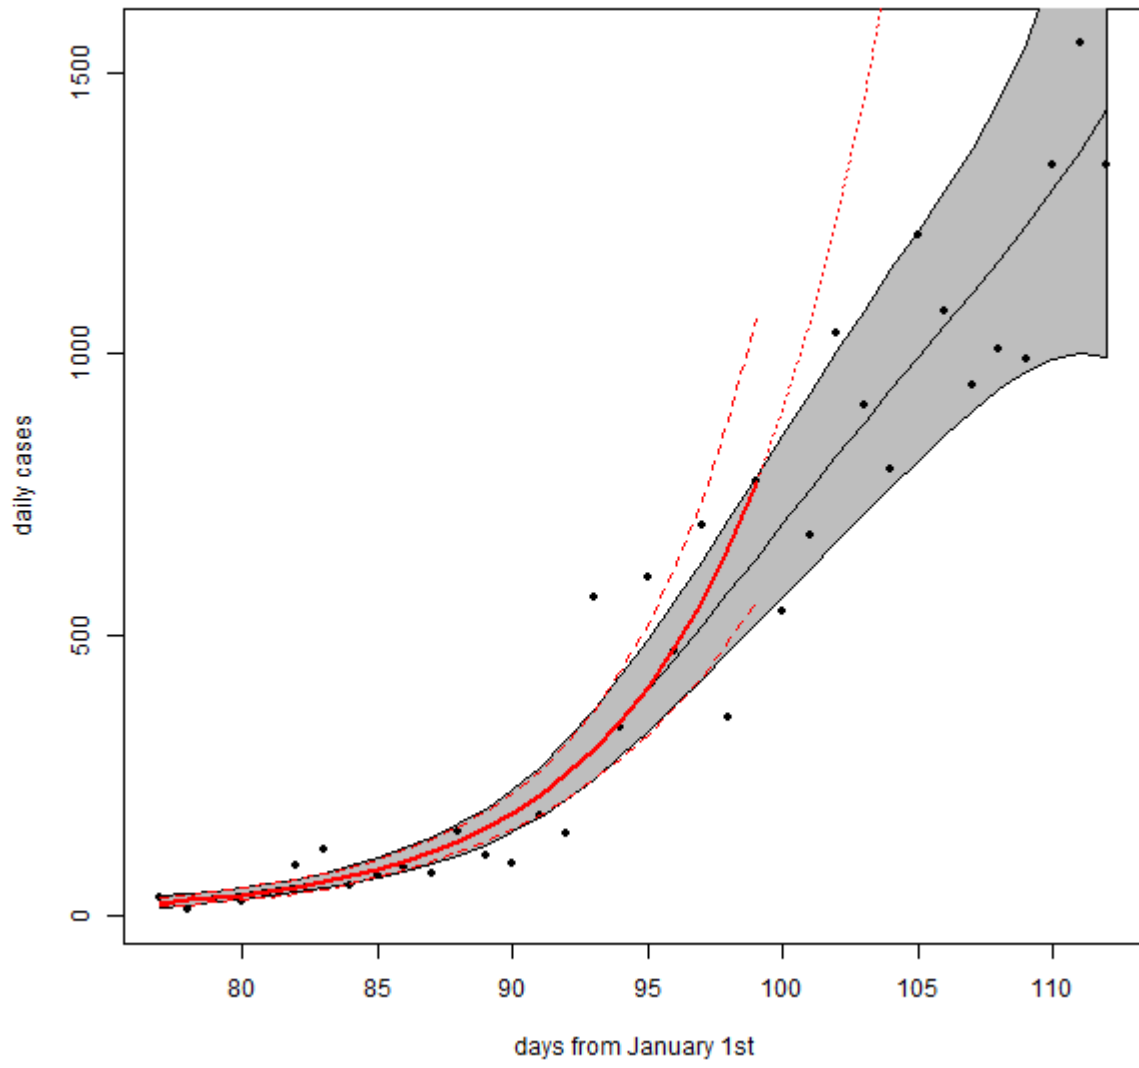



# India

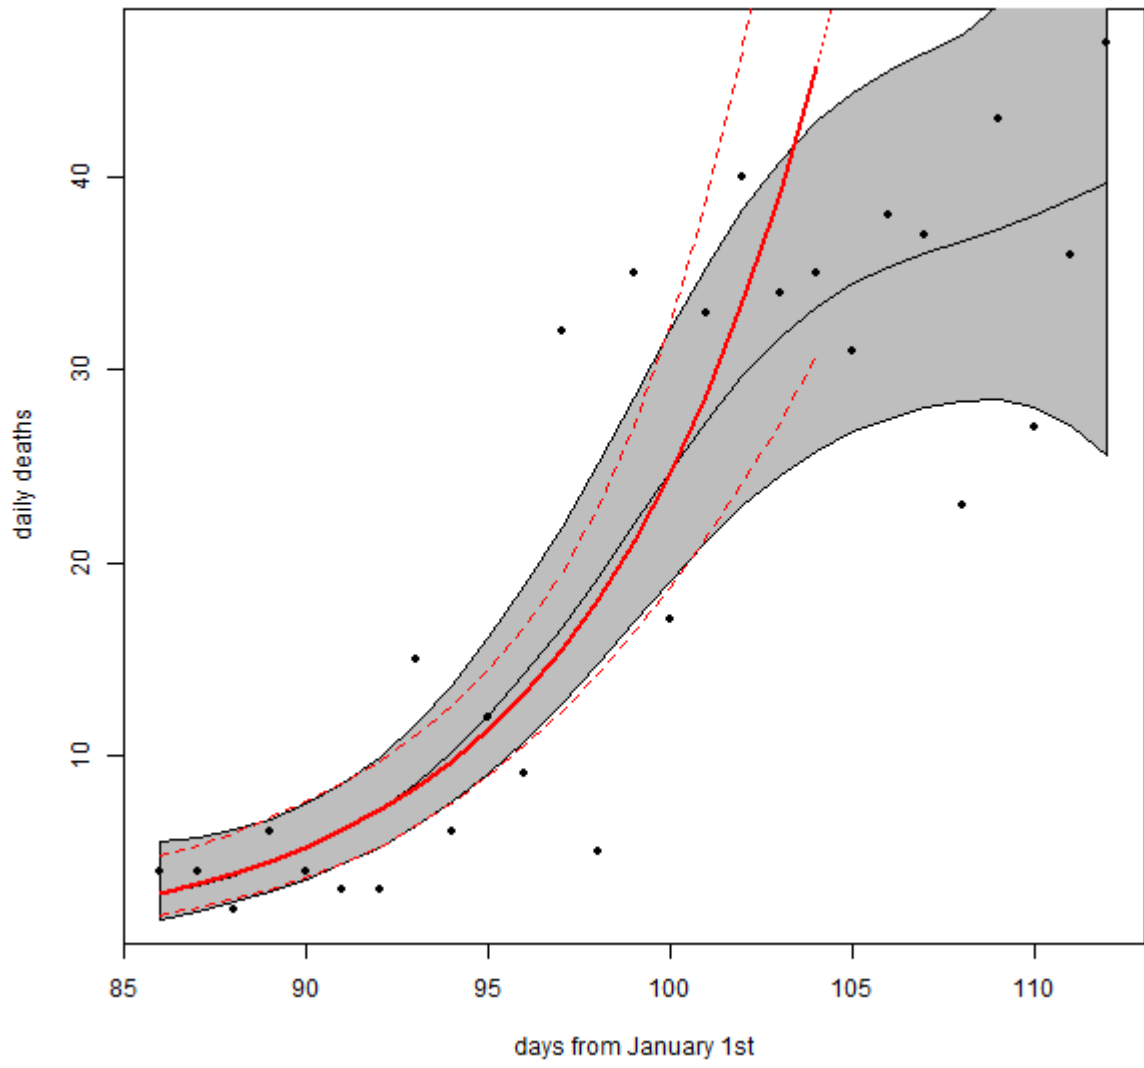

# Indonesia

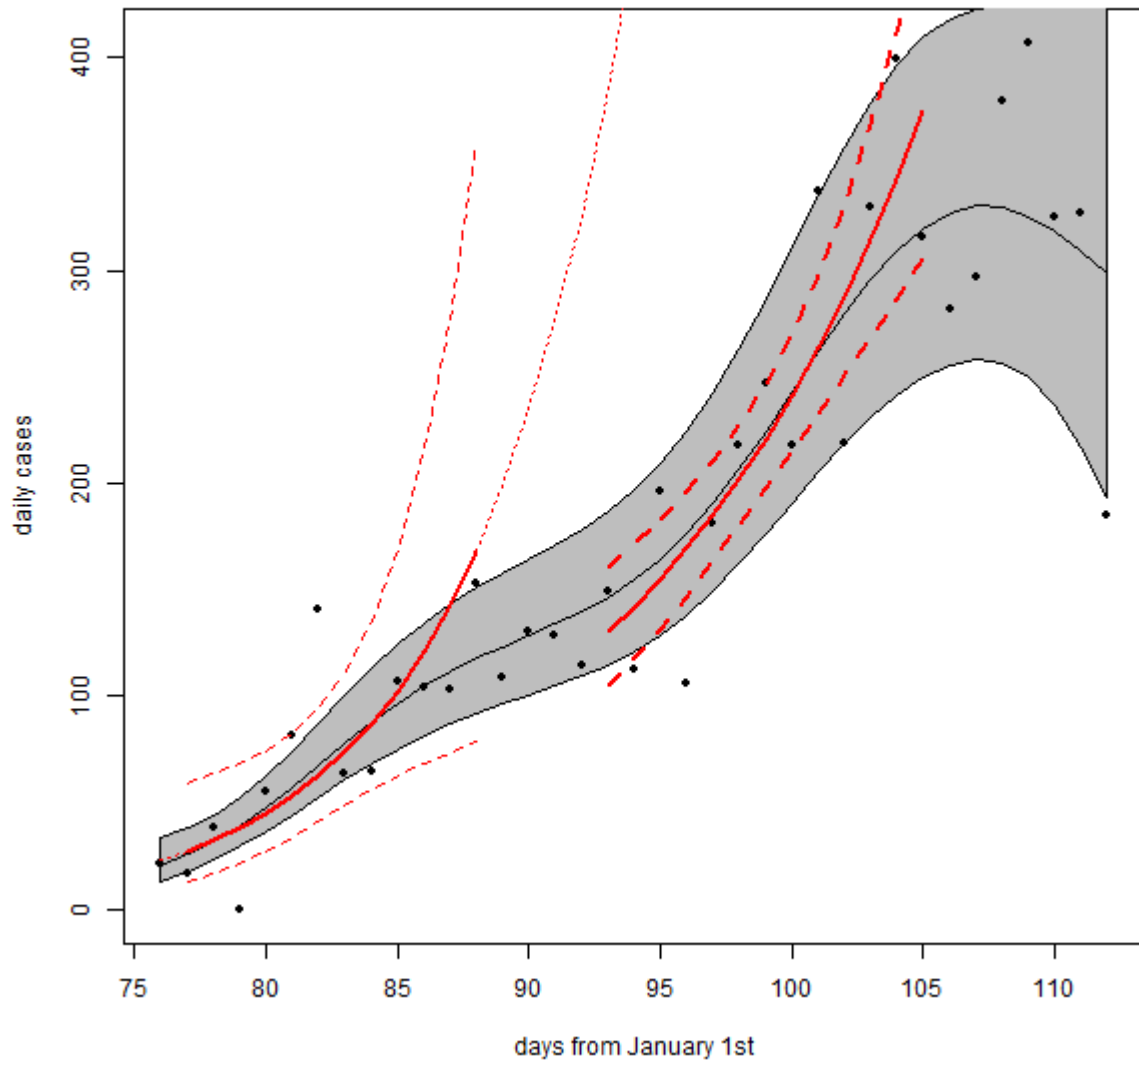

# Indonesia

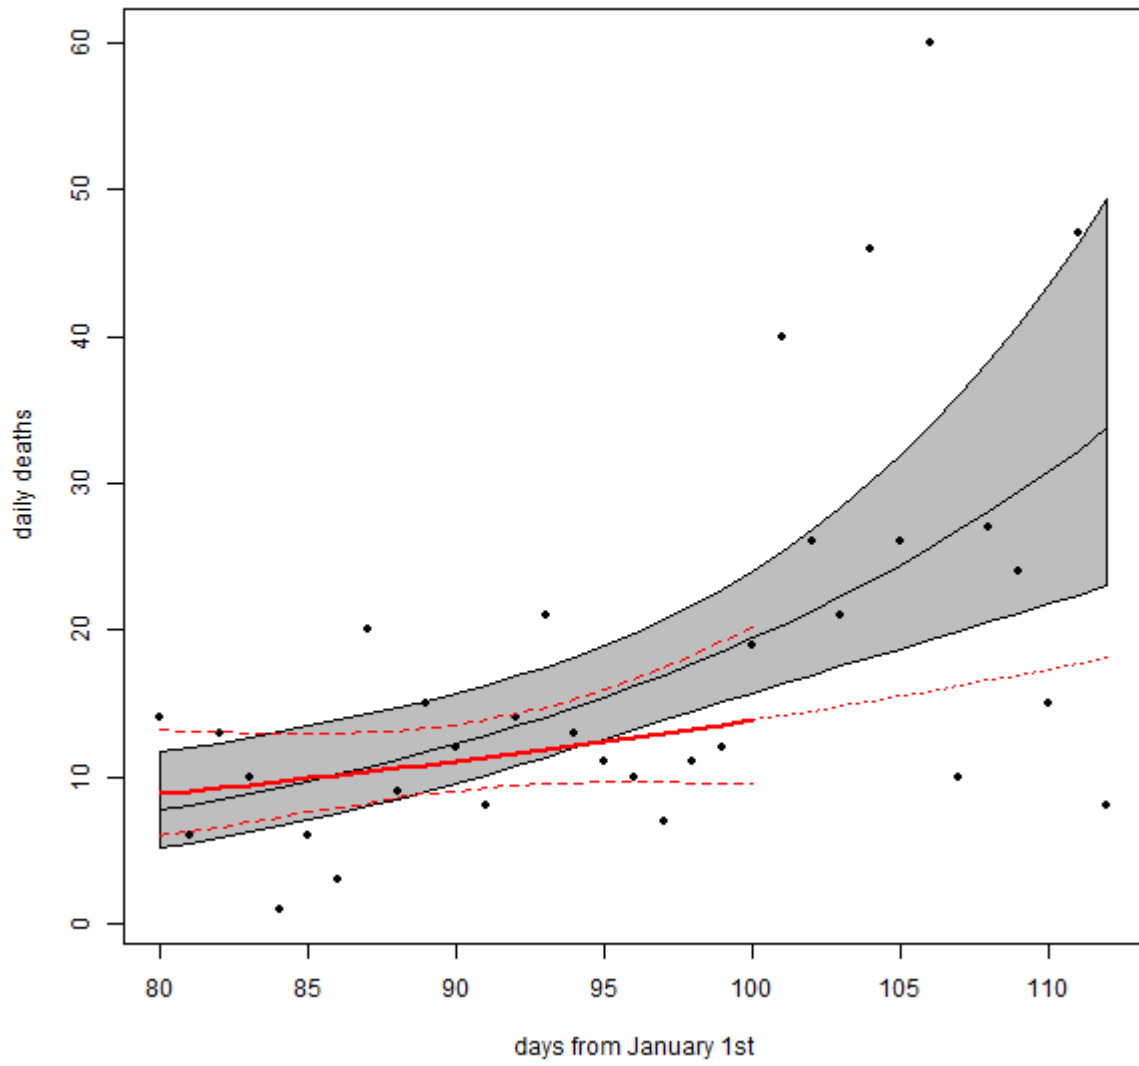

# Iran

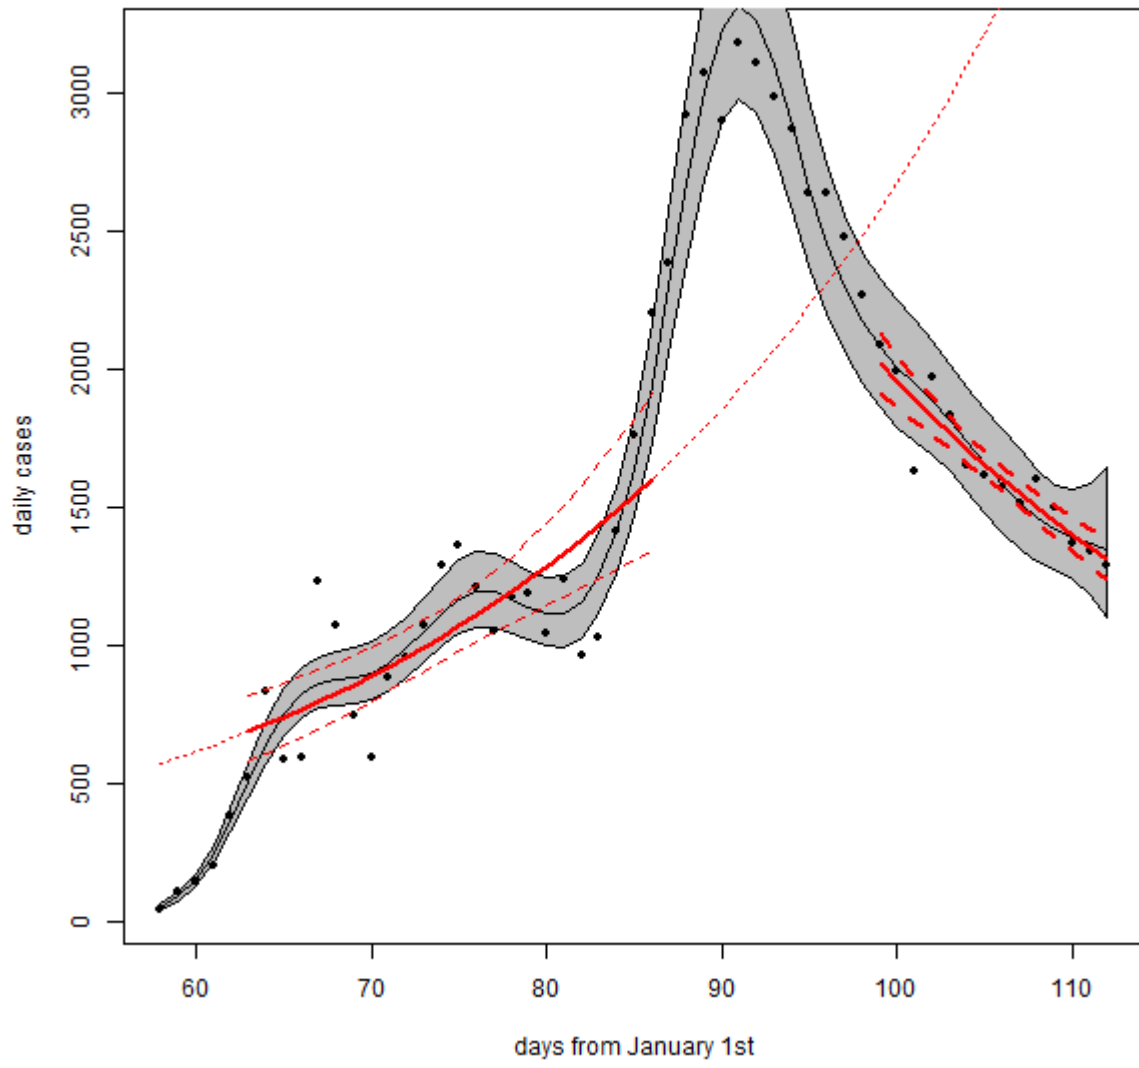

# Iran

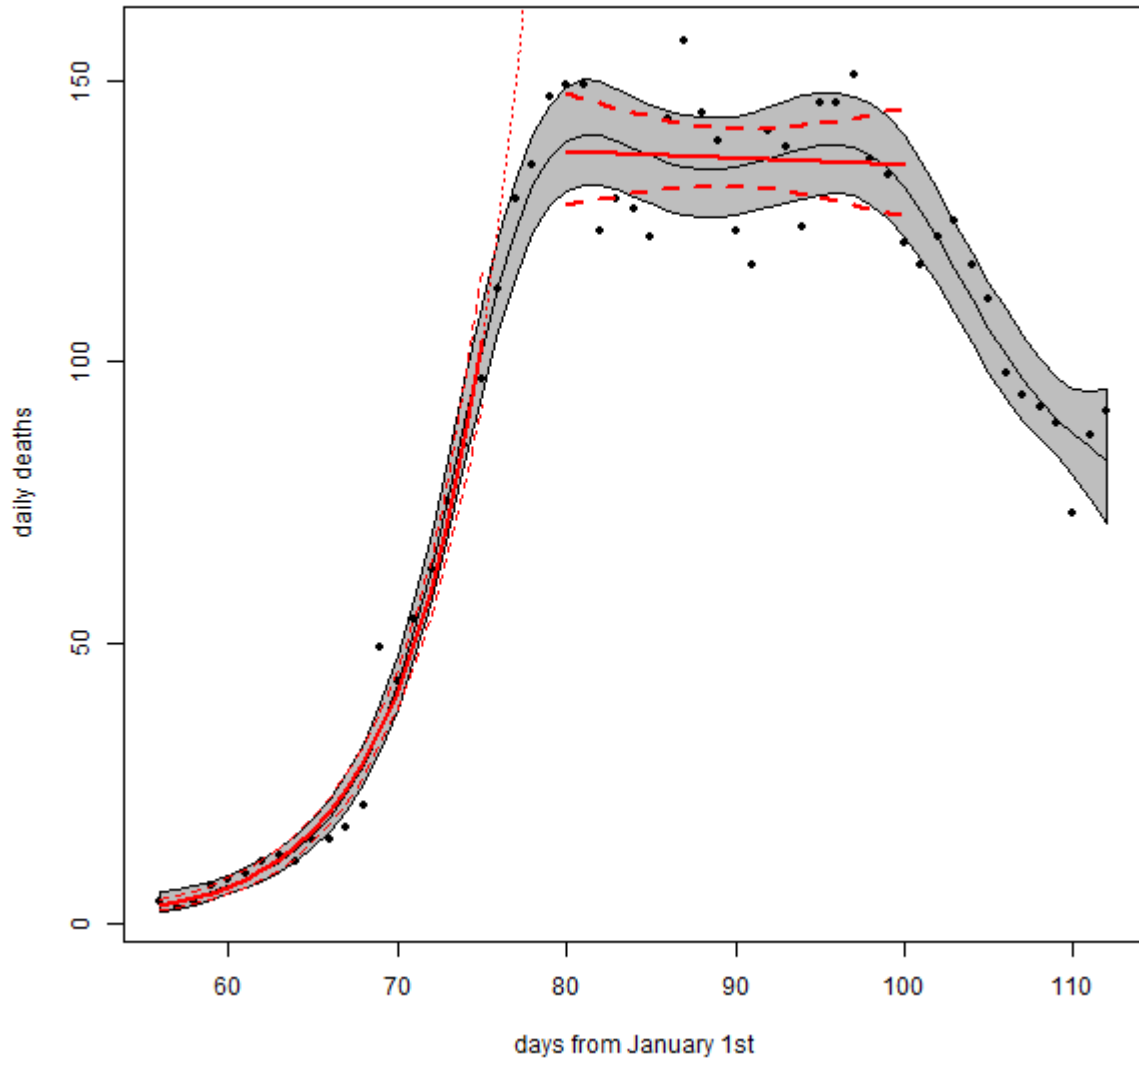

# Iraq

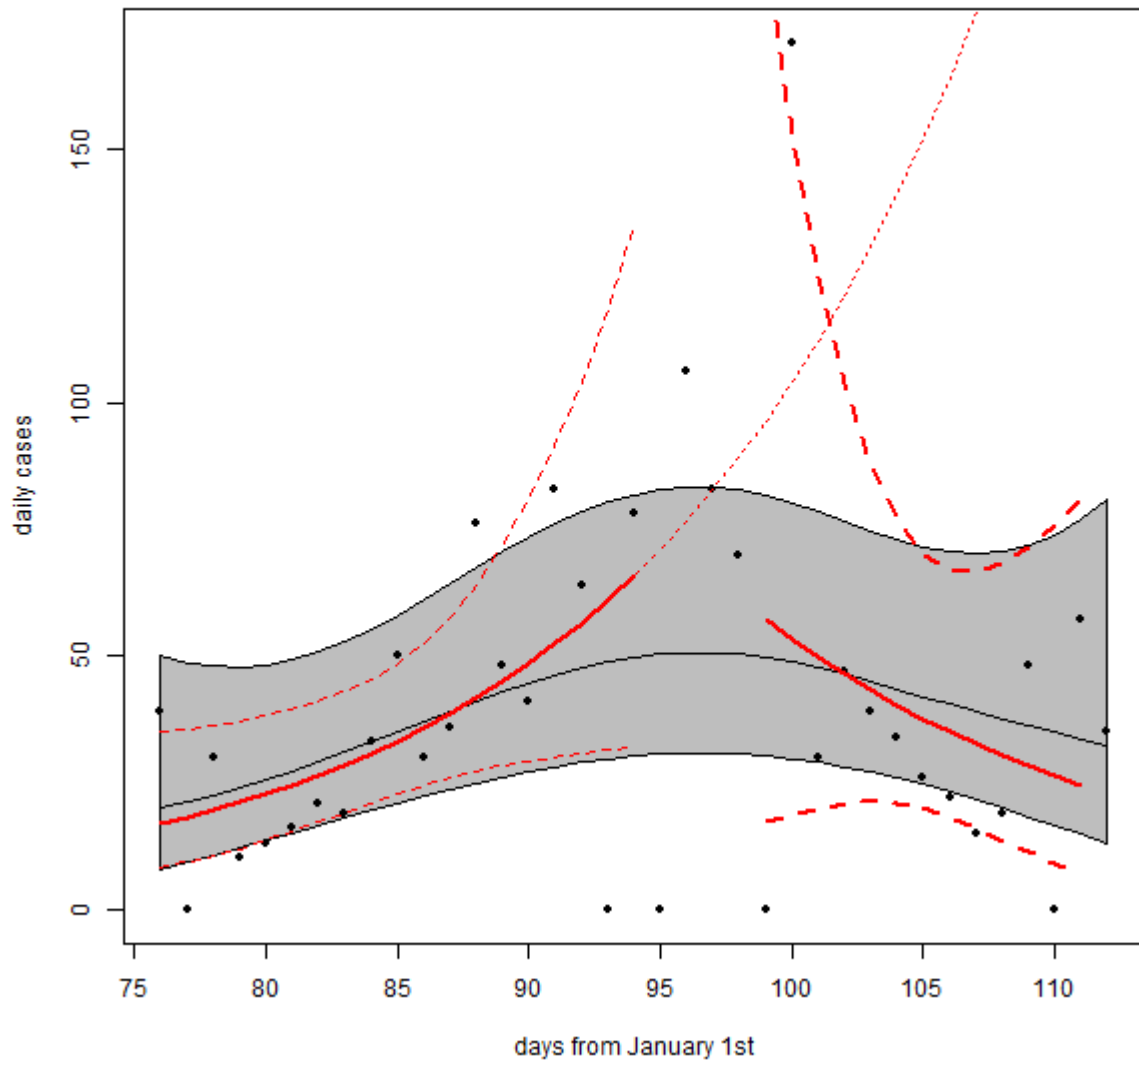

### Ireland

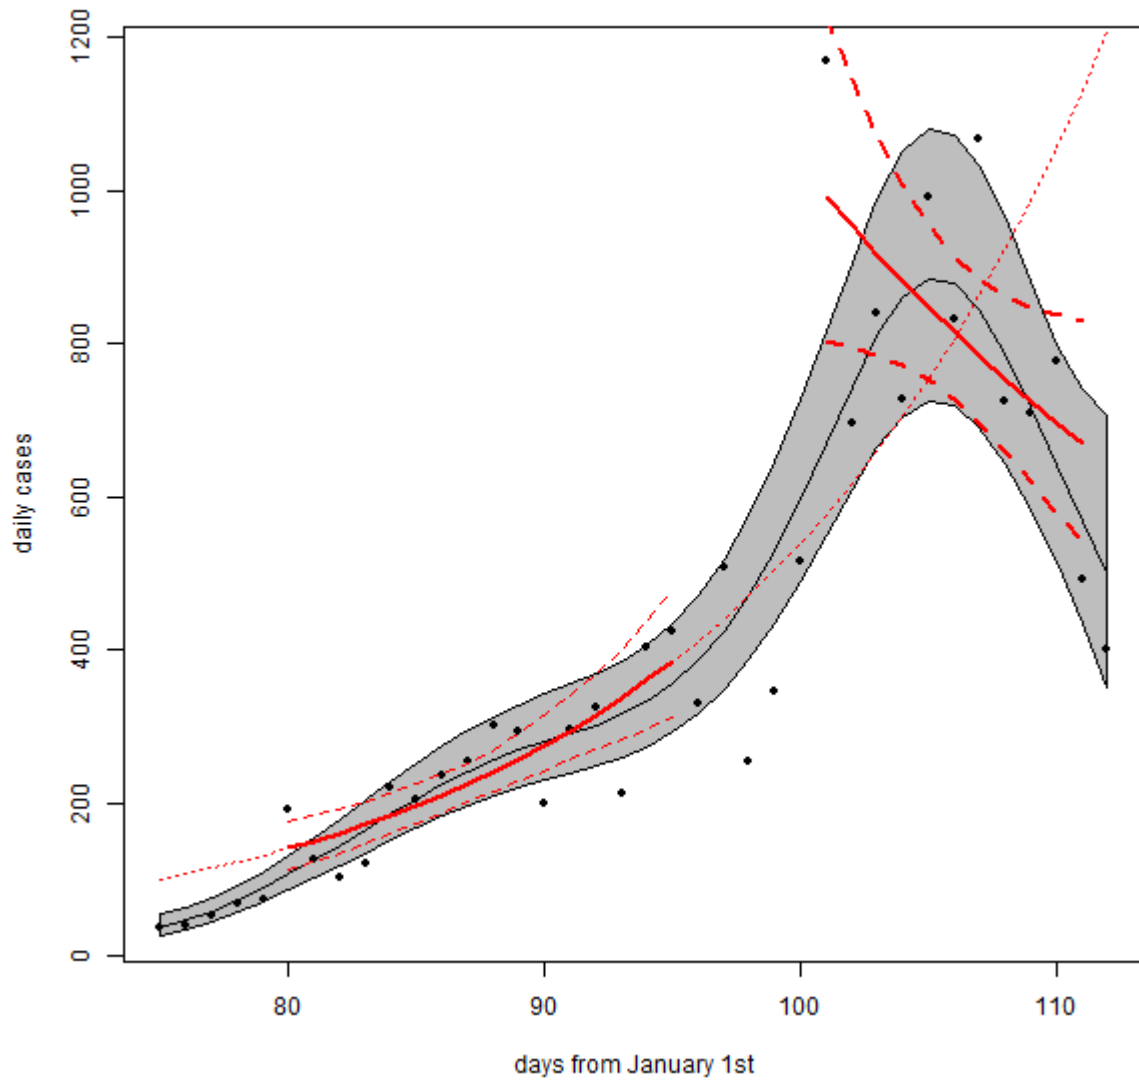

# Ireland

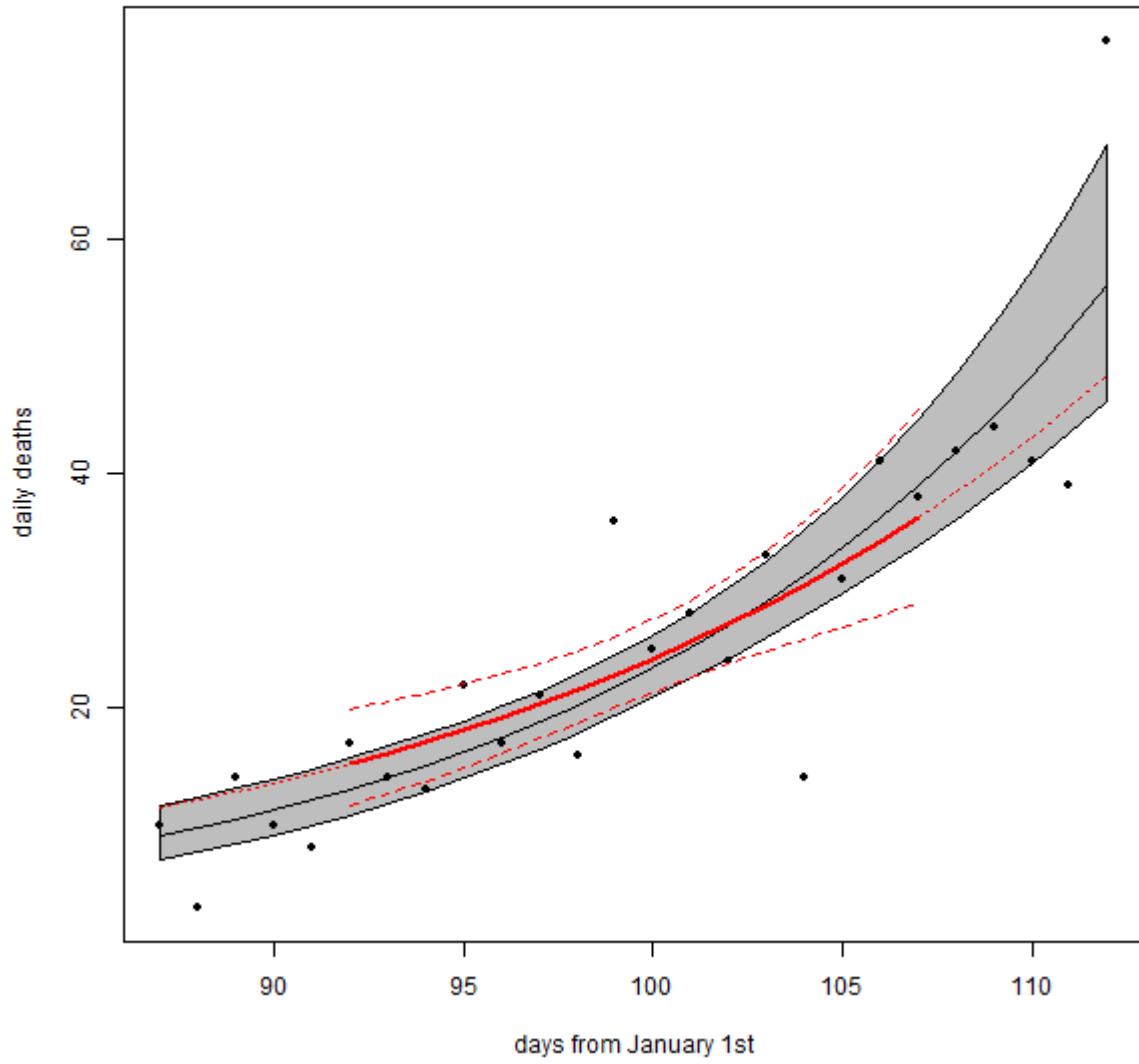



# Israel

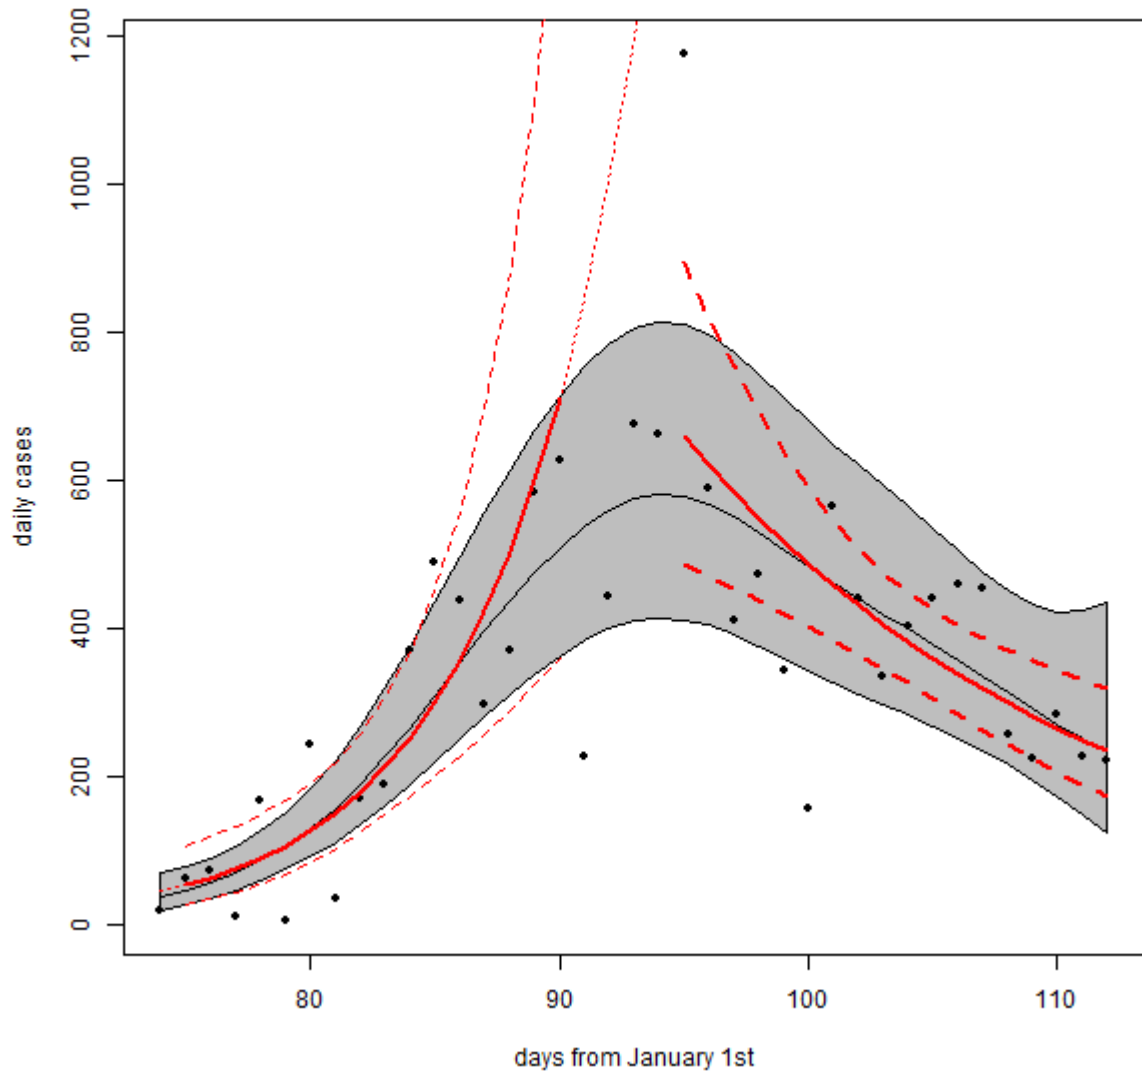

# Italy

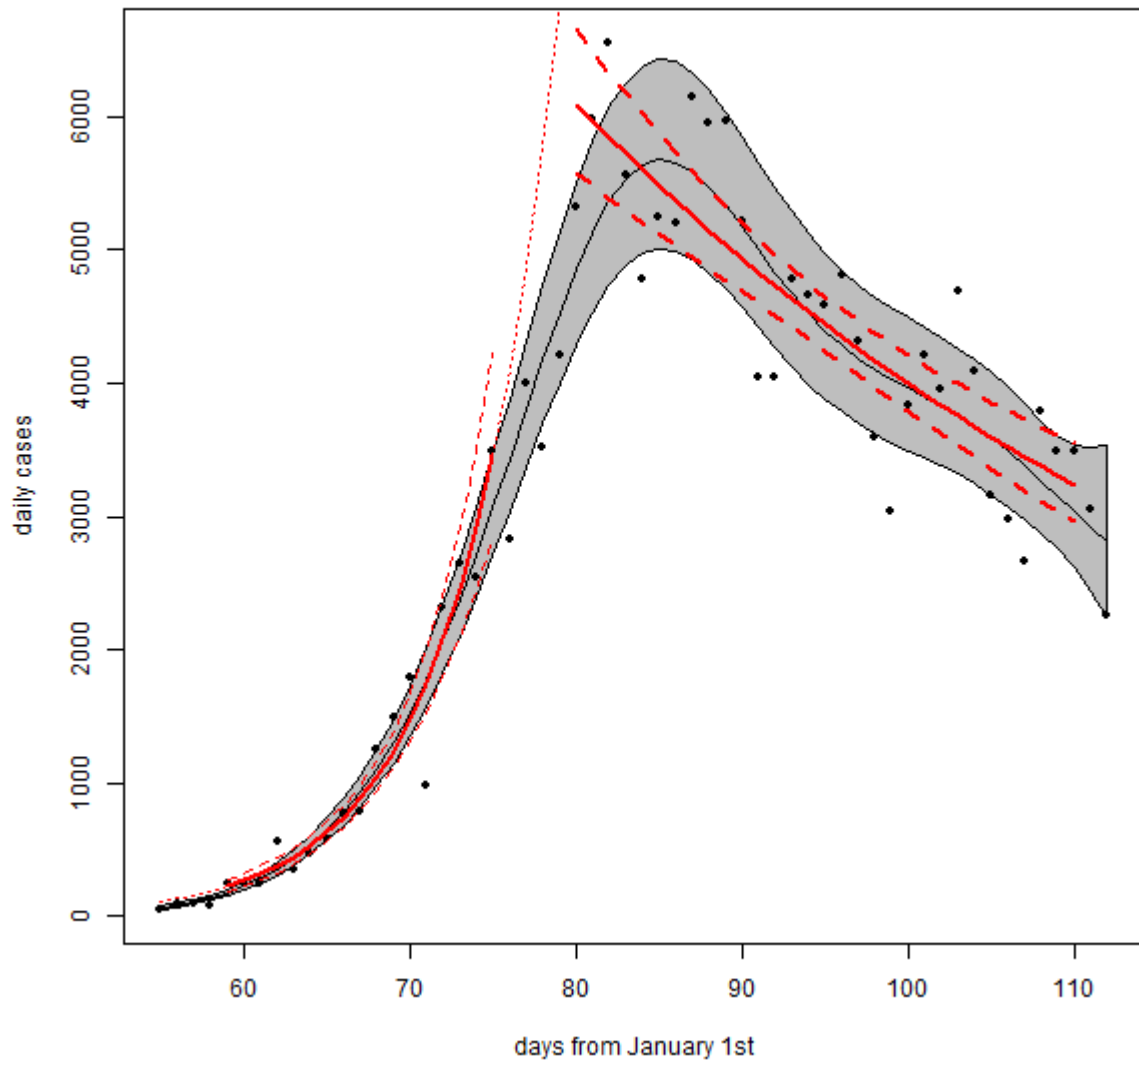

# Italy

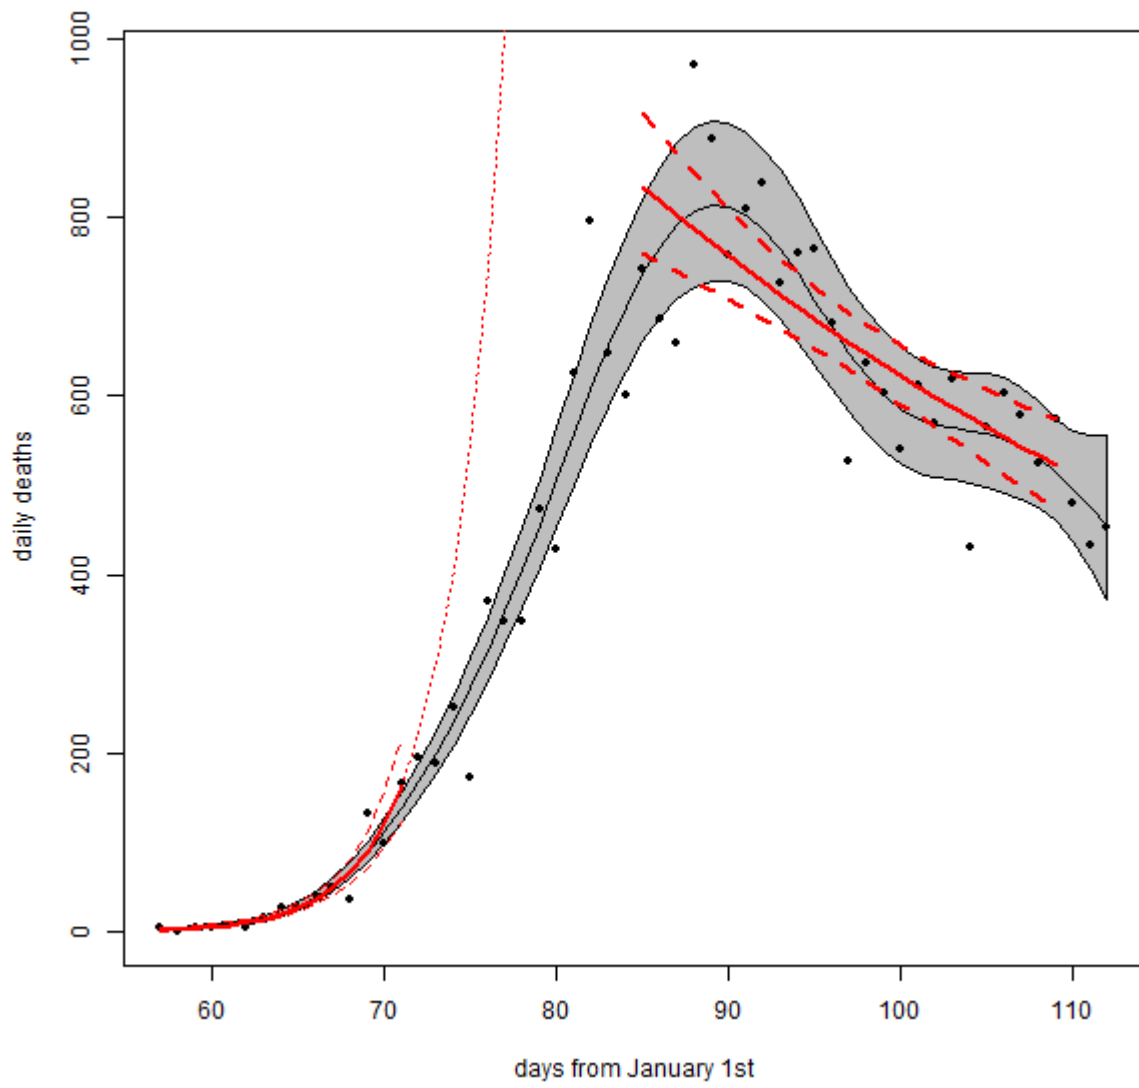

# Japan

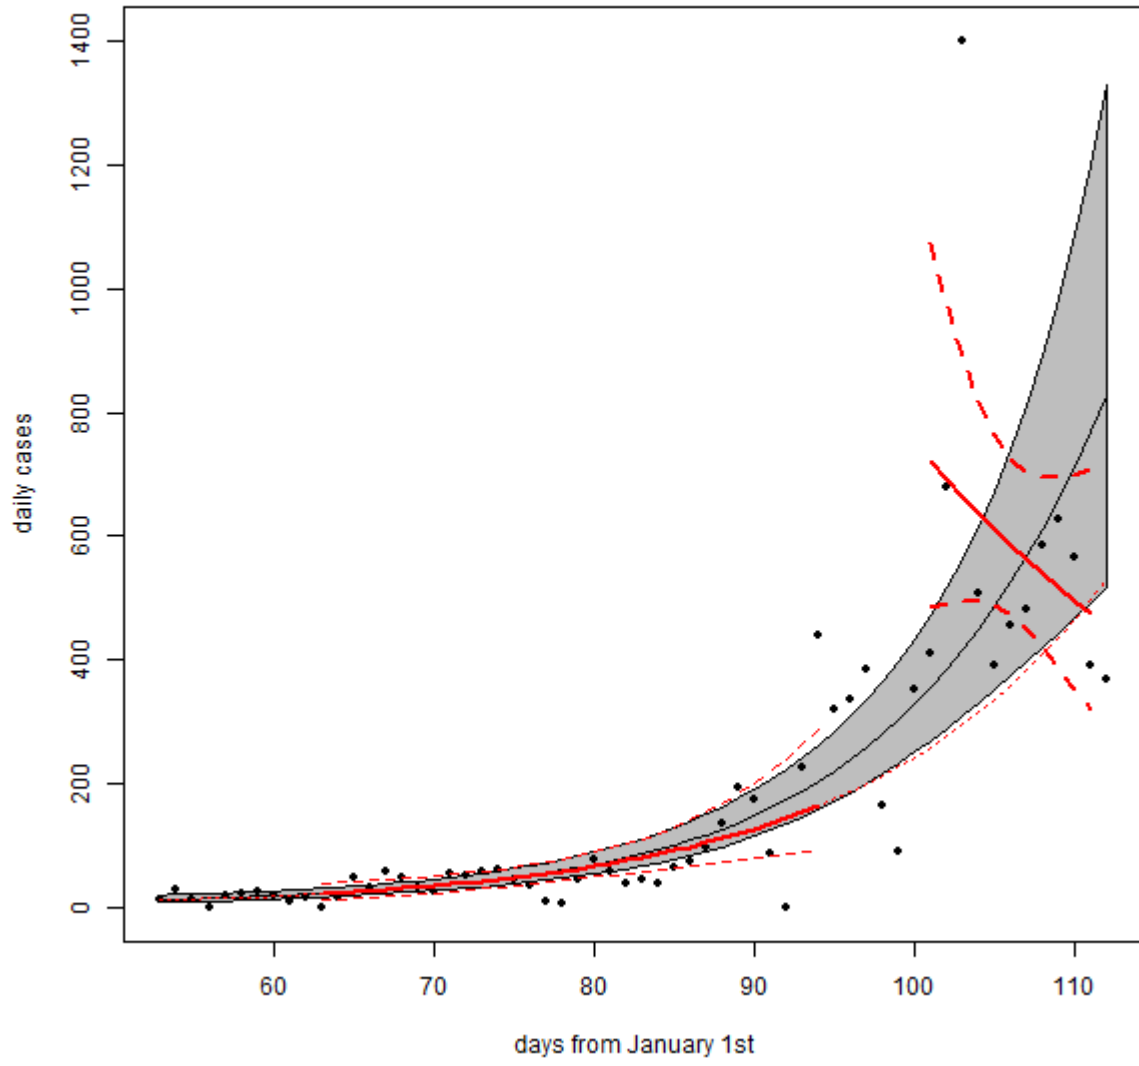

# Japan

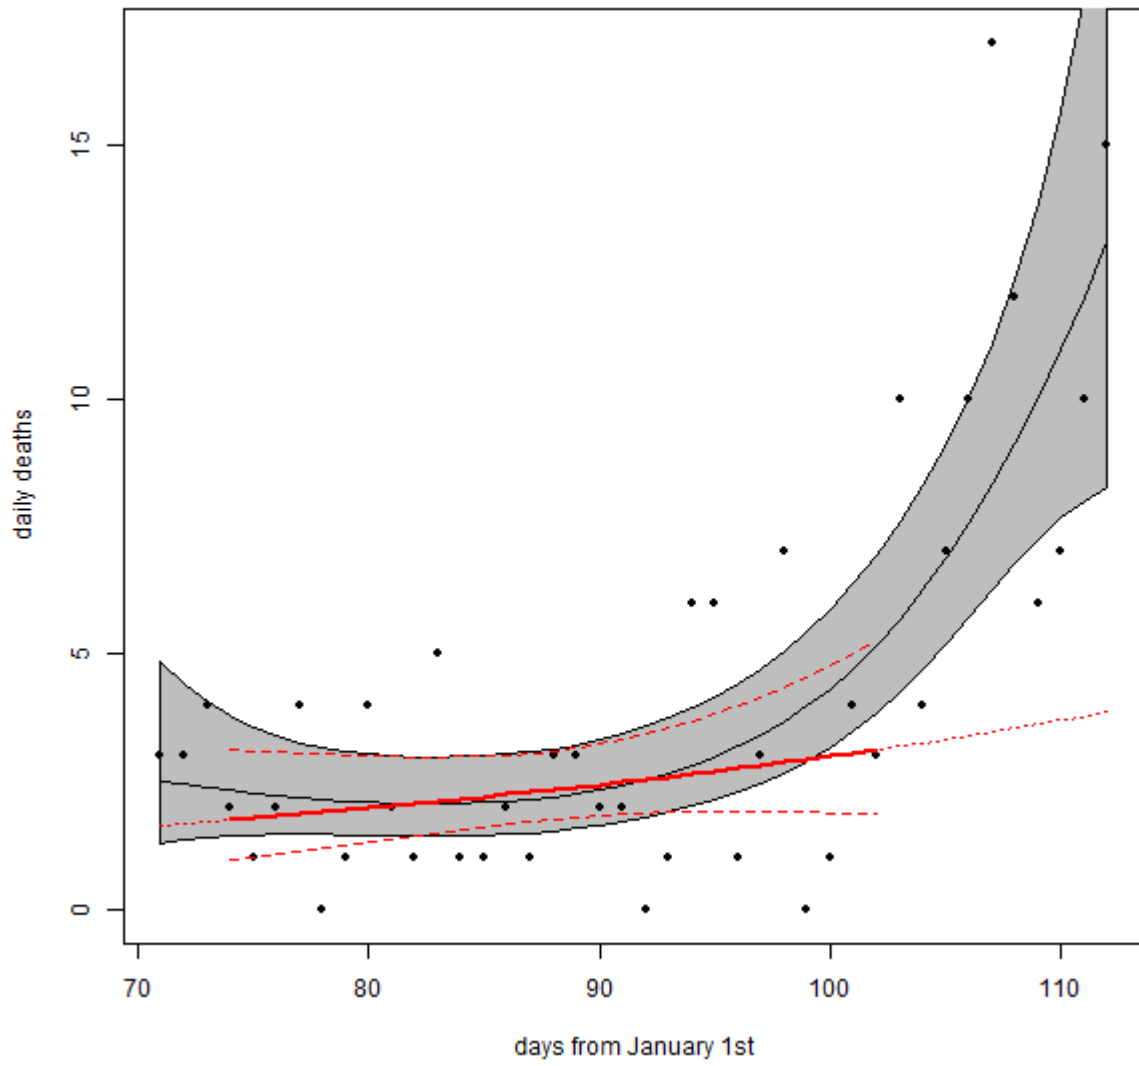

# Kazakhstan

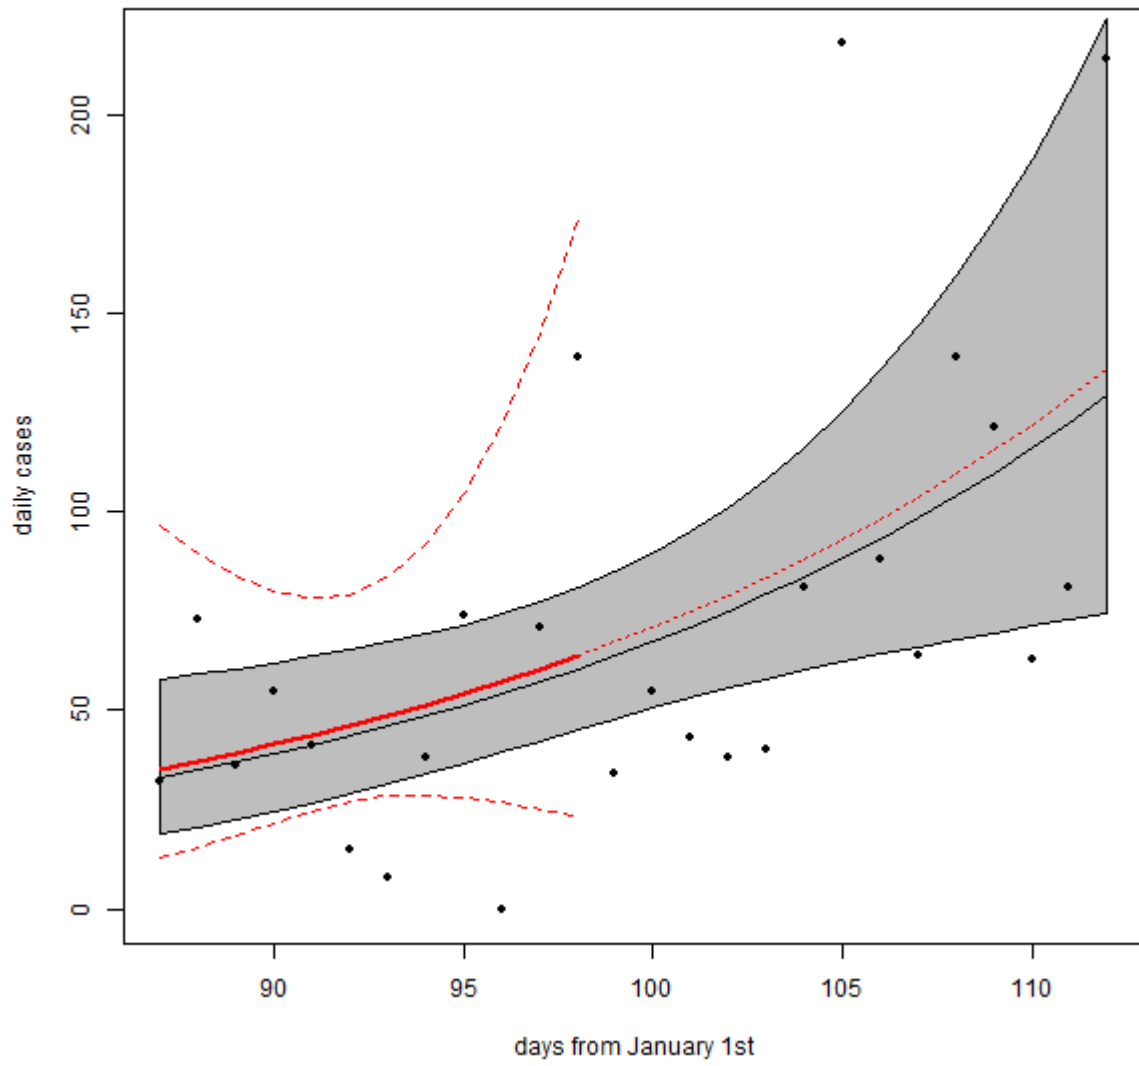

# Kuwait

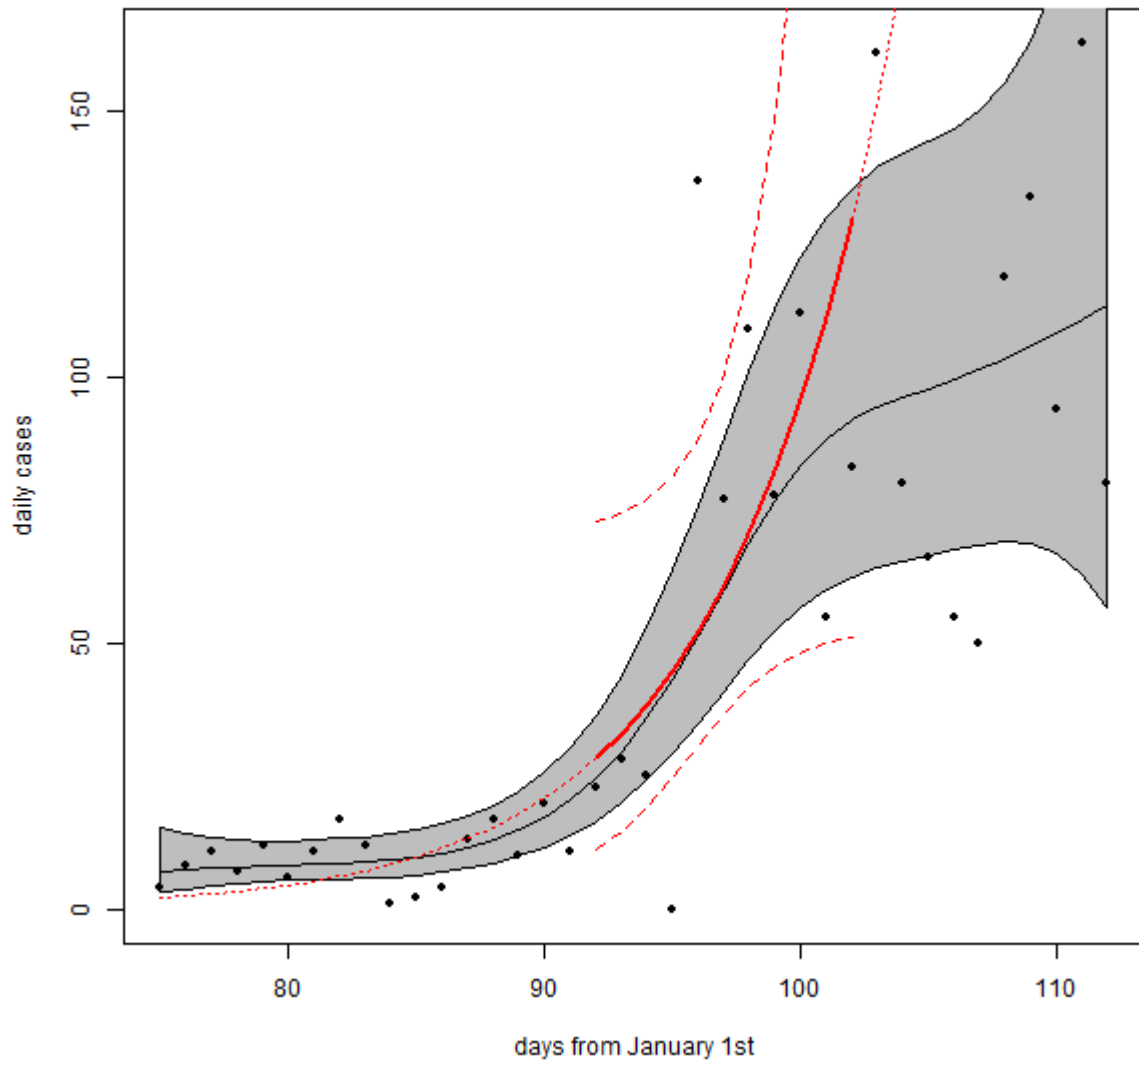

### Malaysia

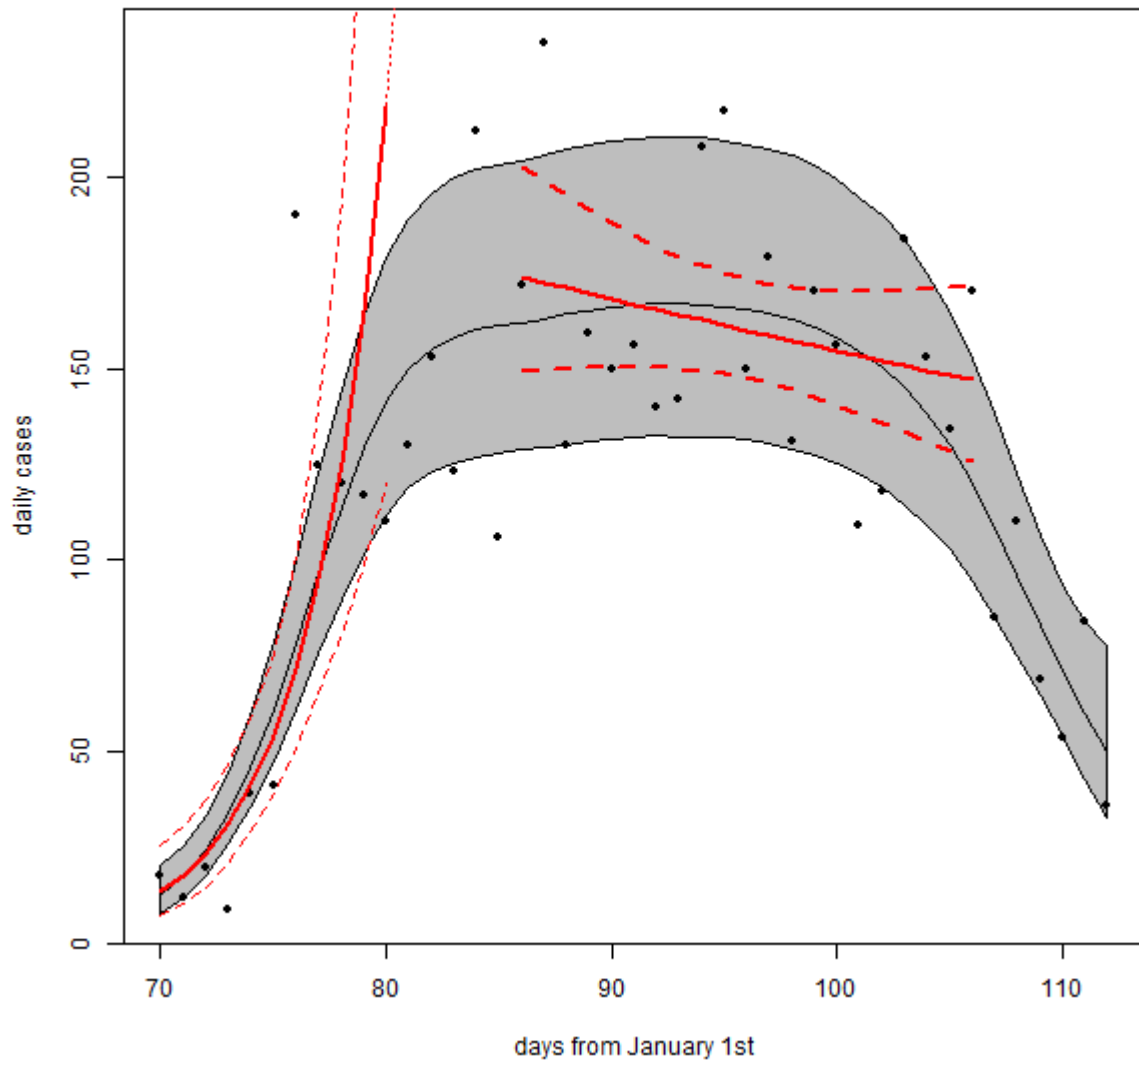



# Mexico

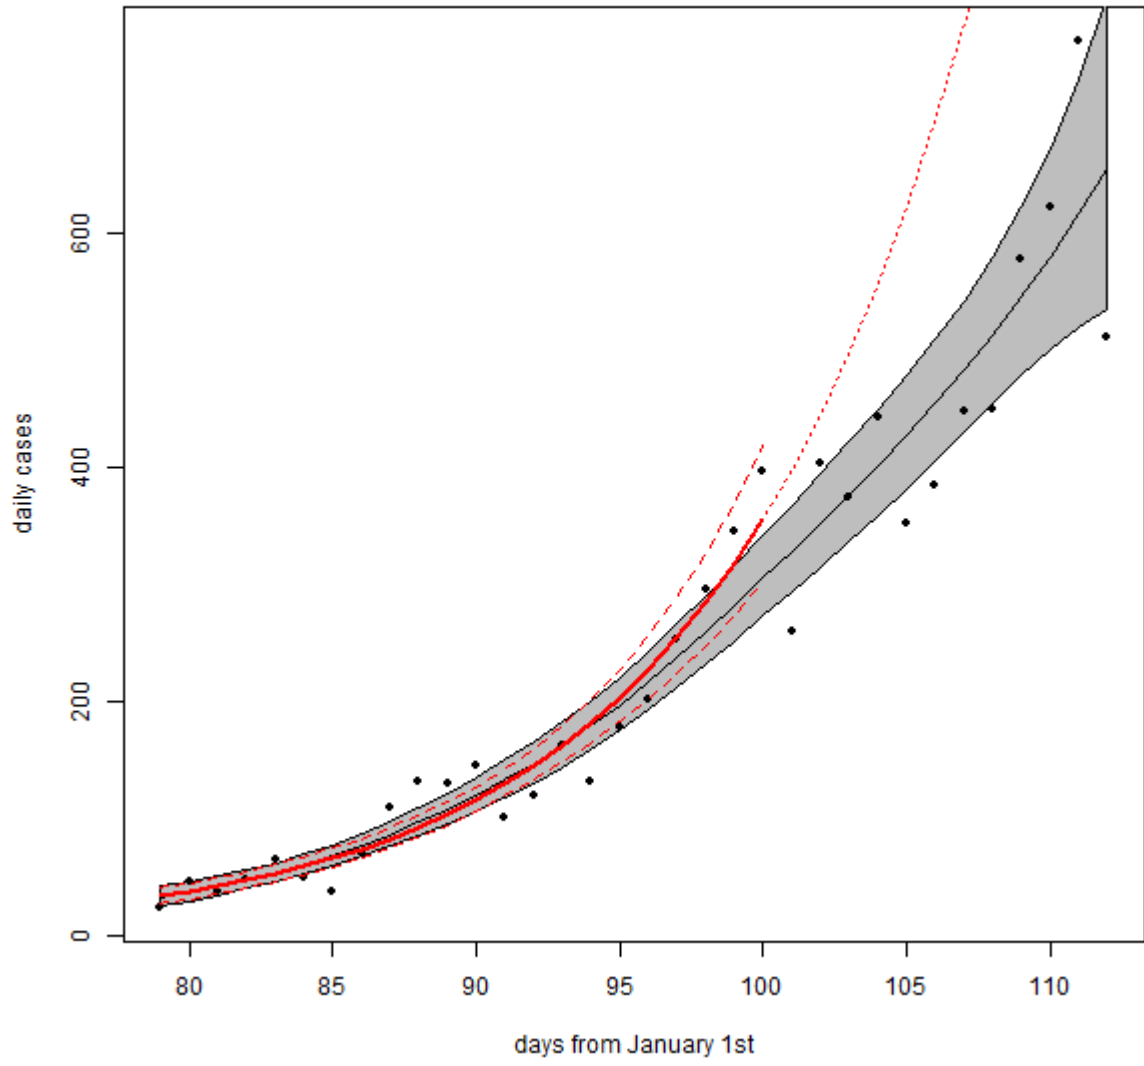

# Mexico

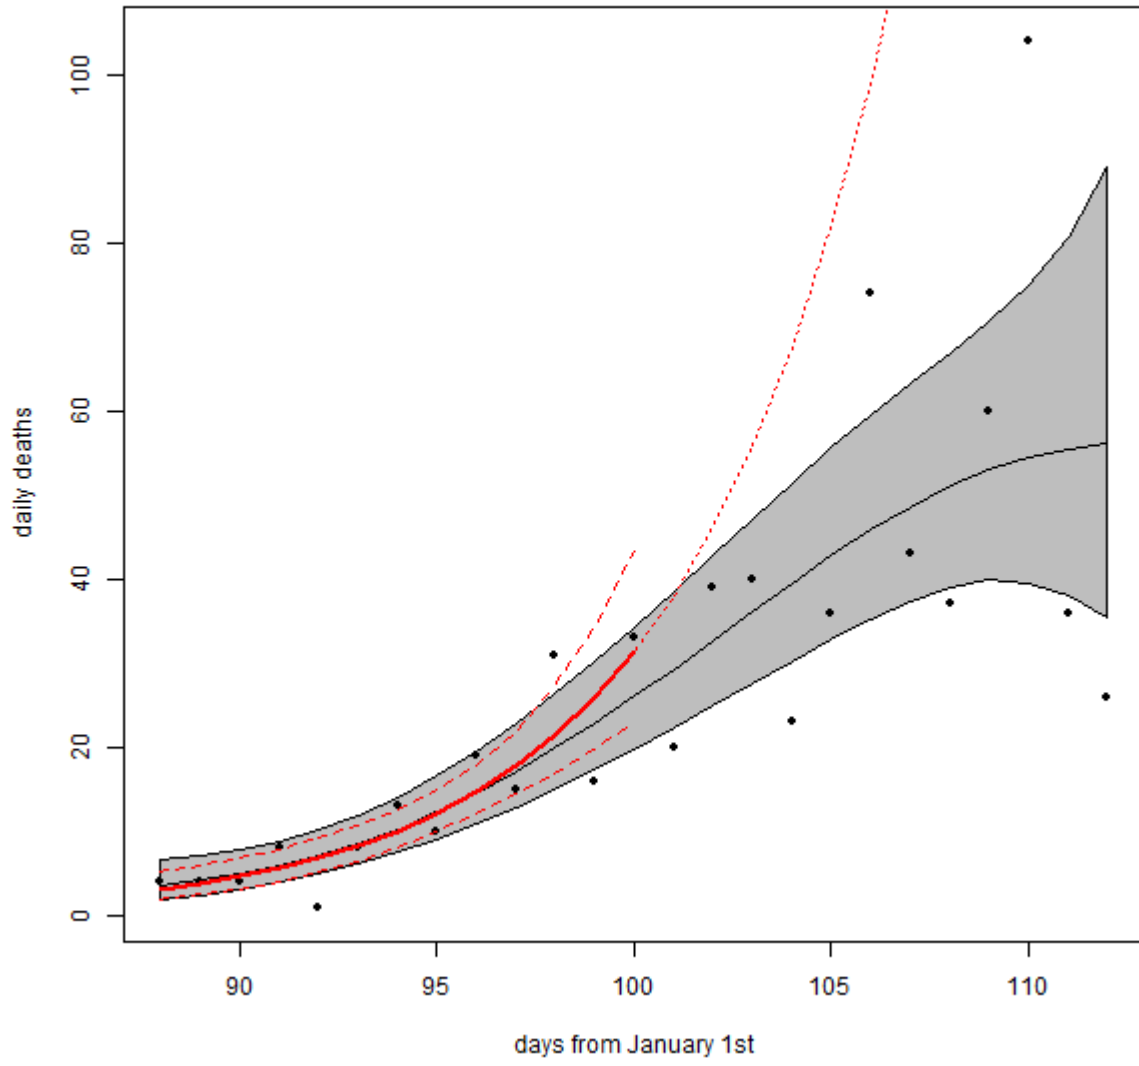

### Moldova

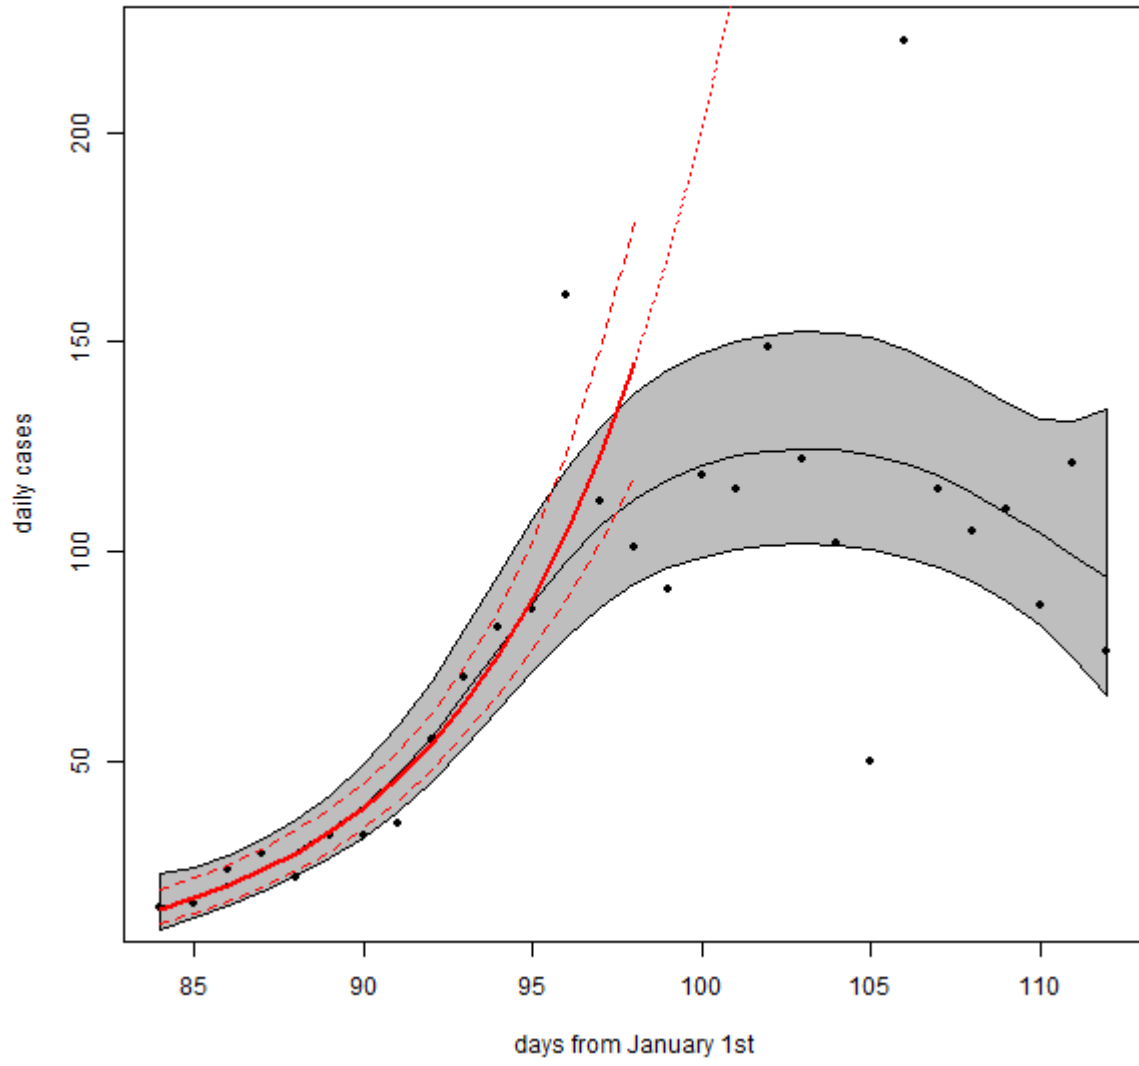

# Morocco

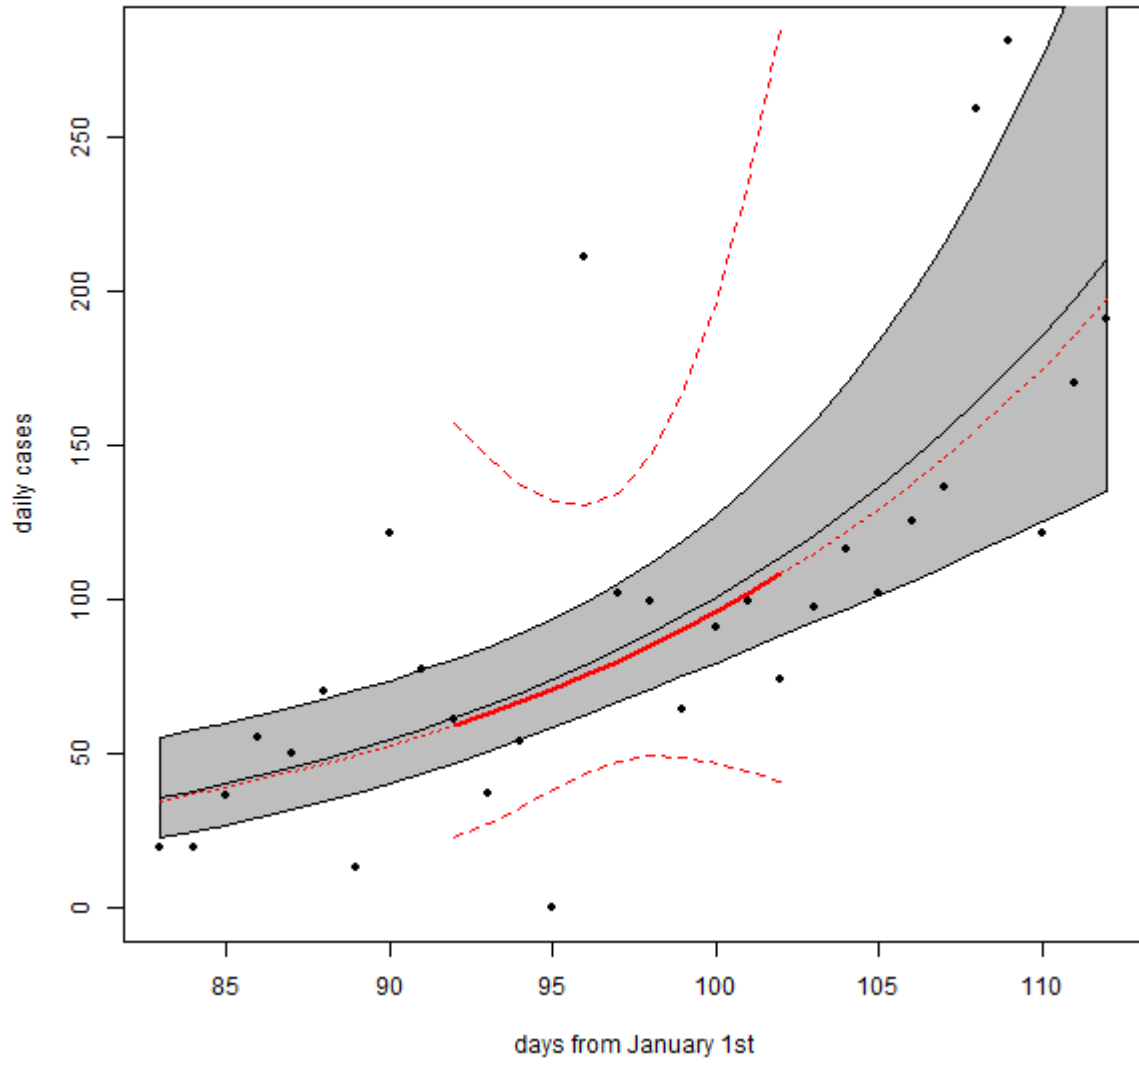

### N\_Macedonia

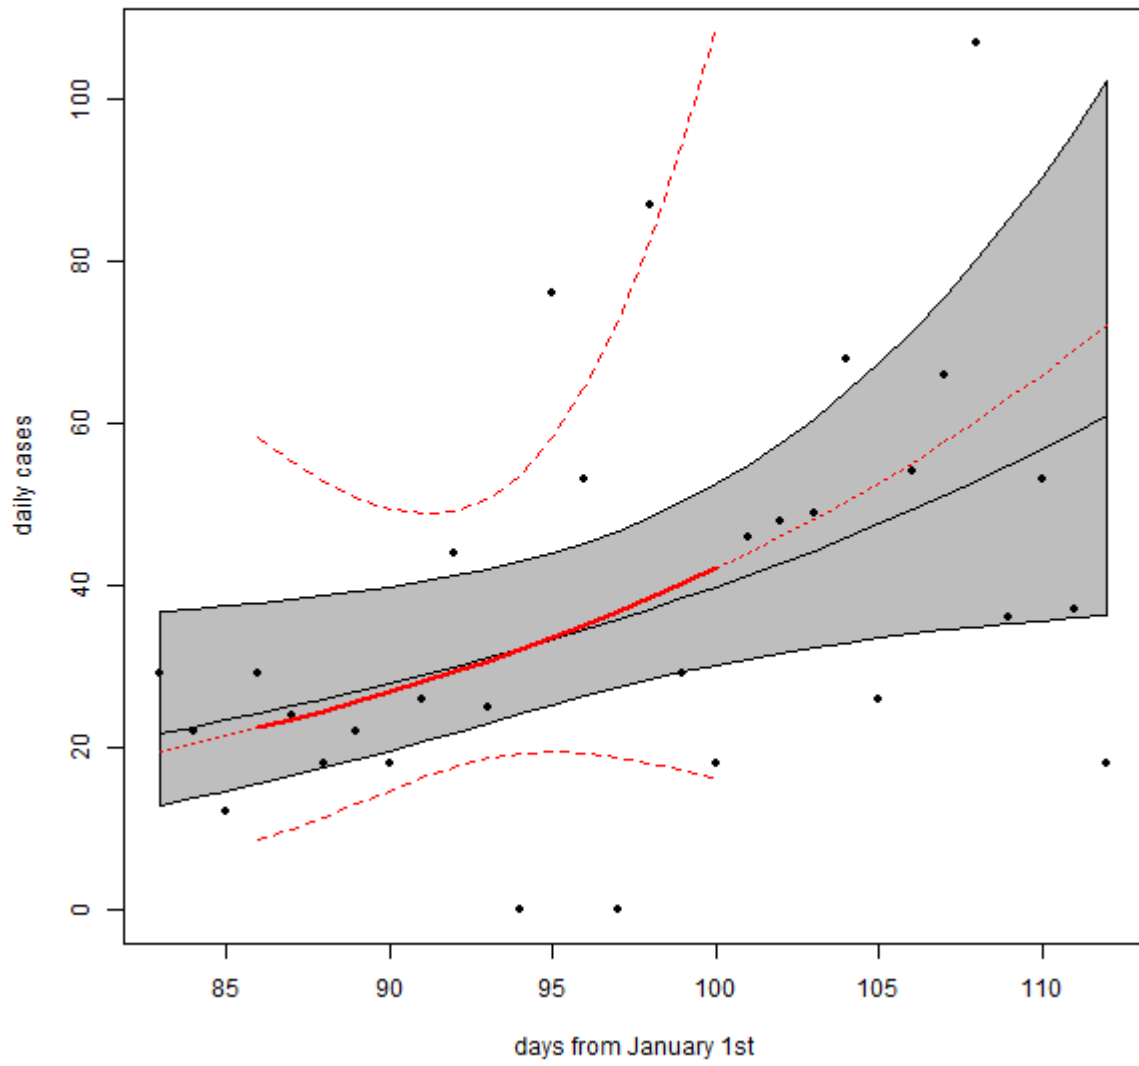

### Netherlands

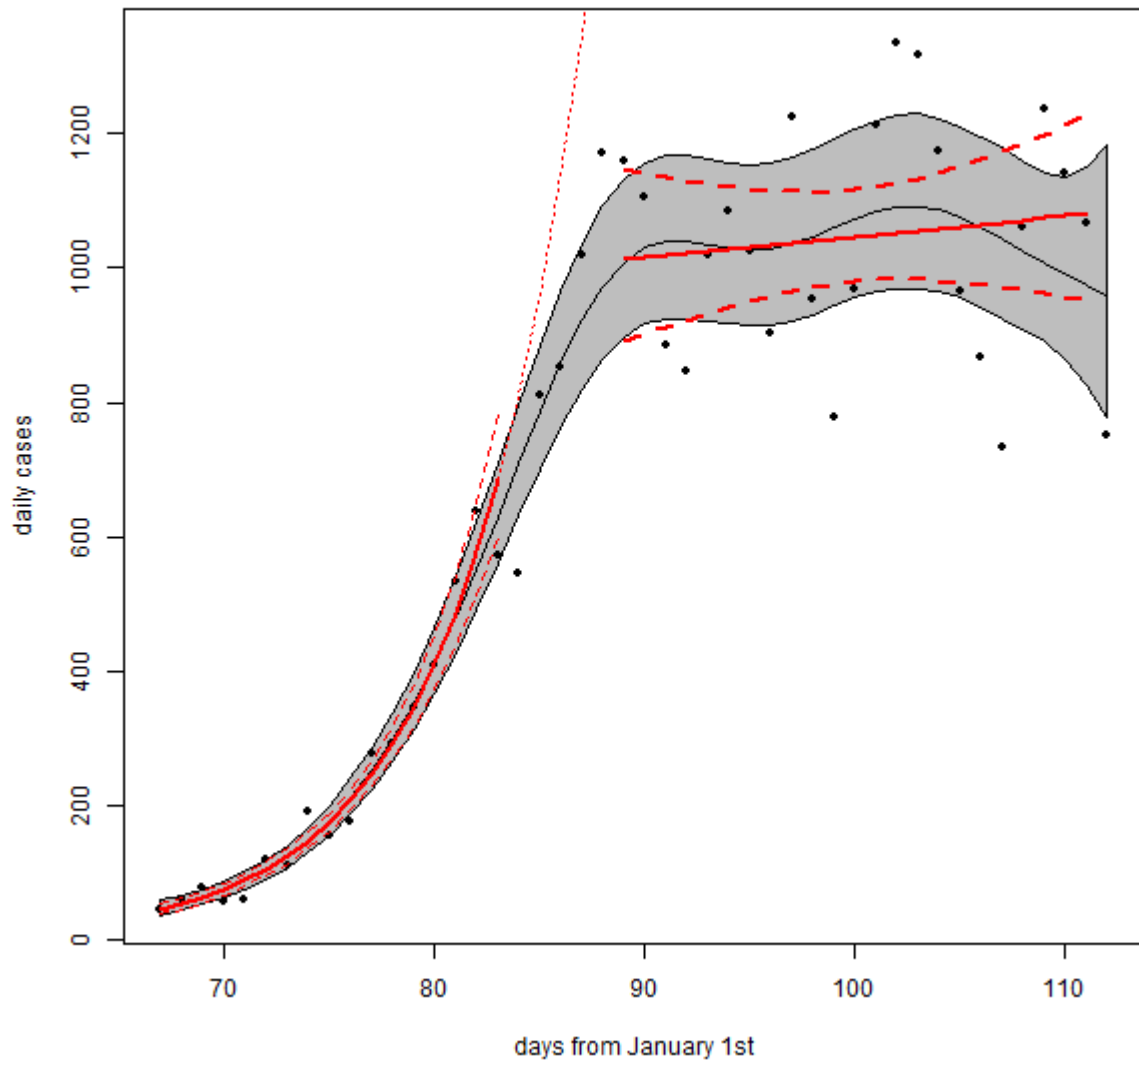

### Netherlands

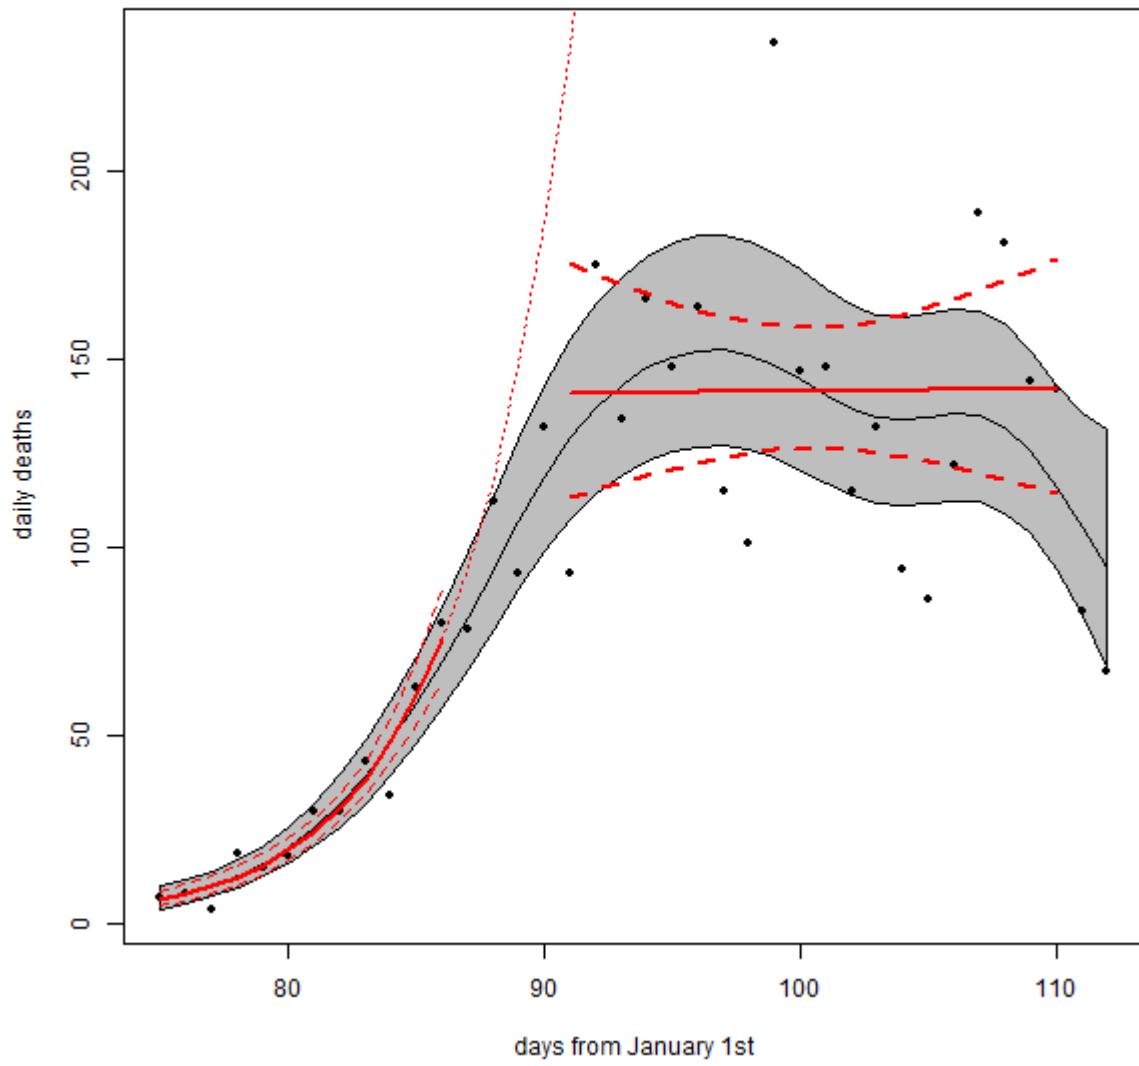

# Norway

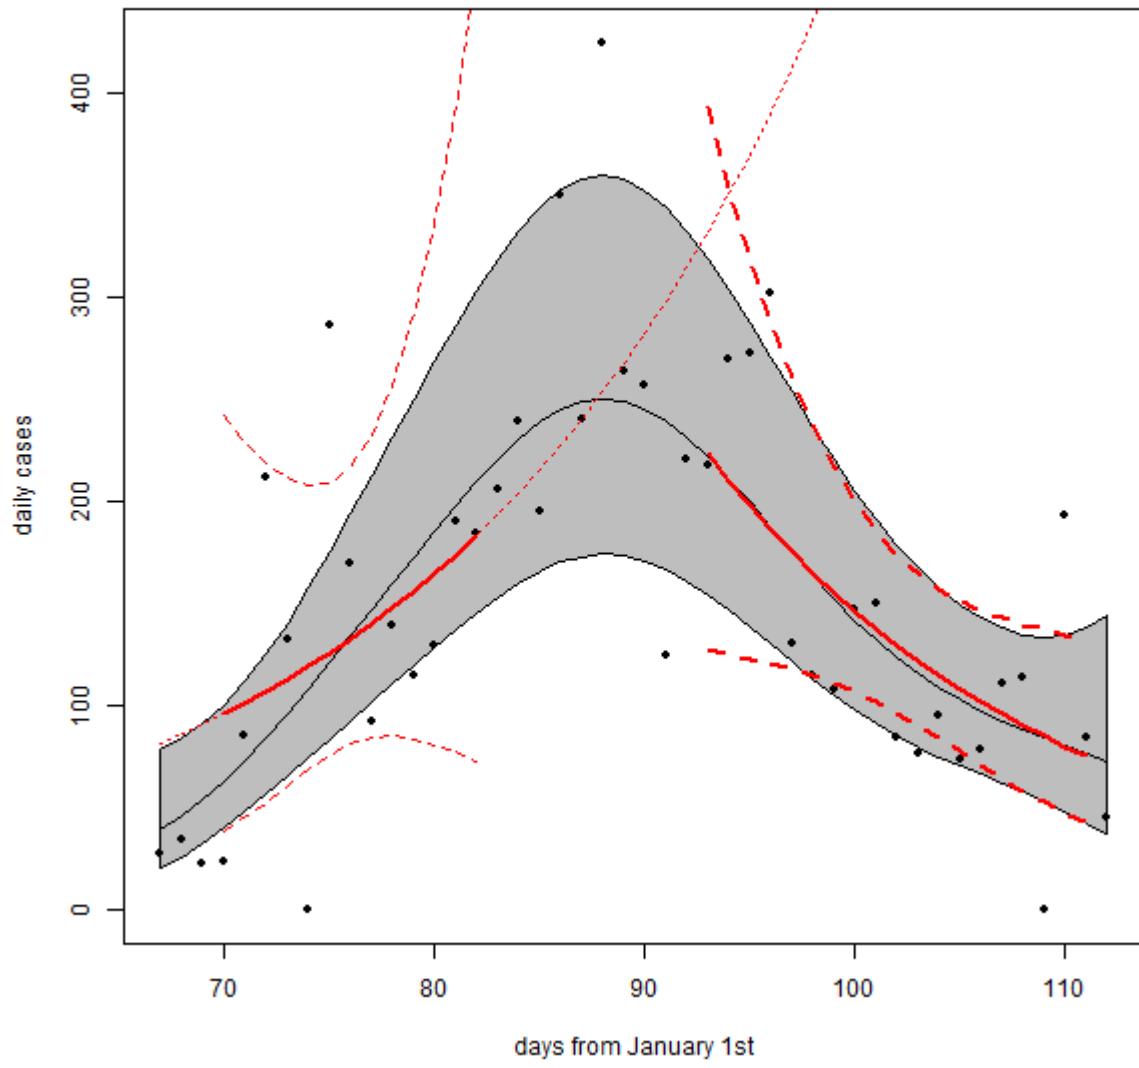



### Norway

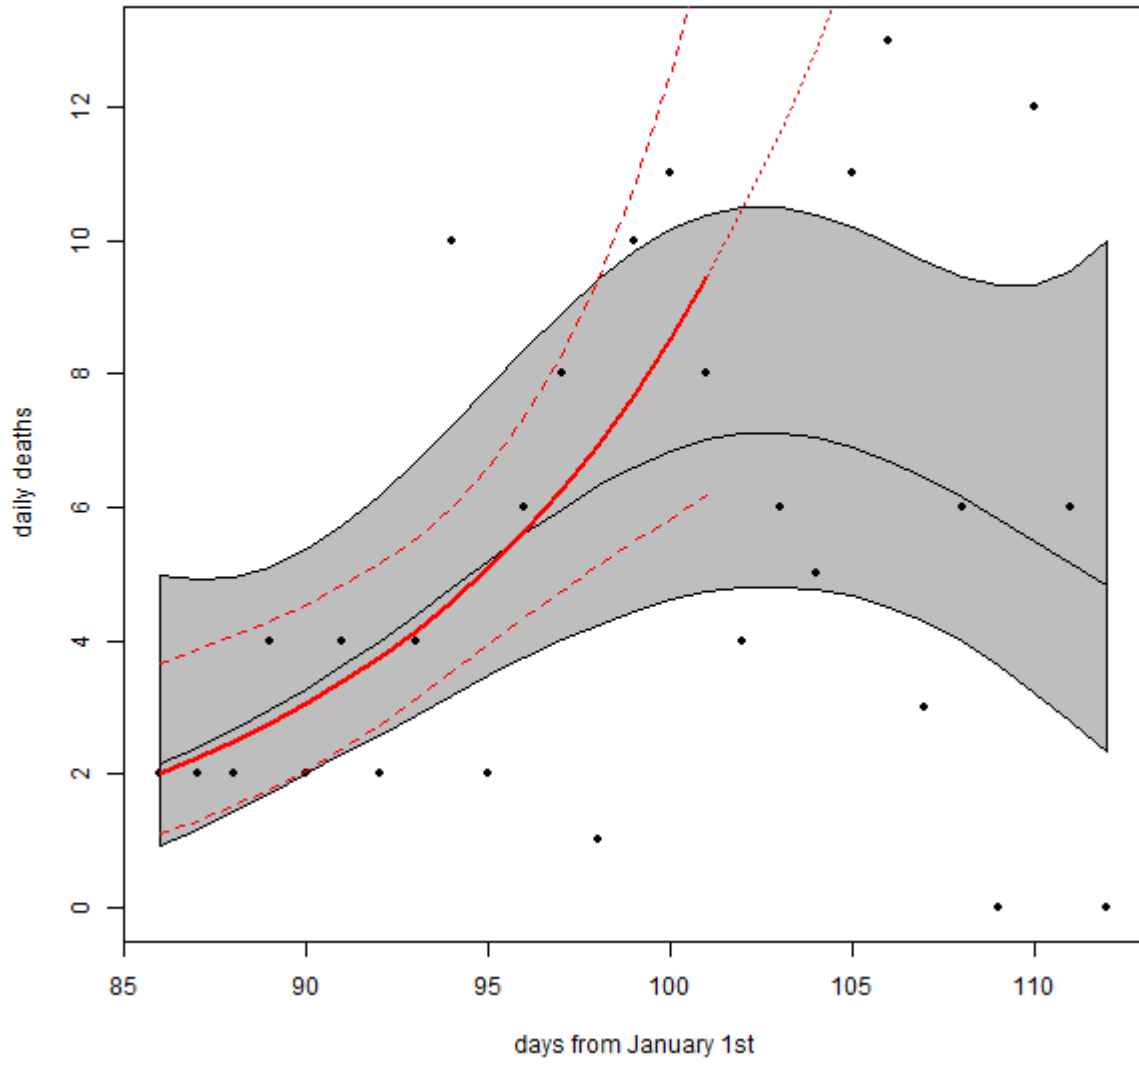

# Oman

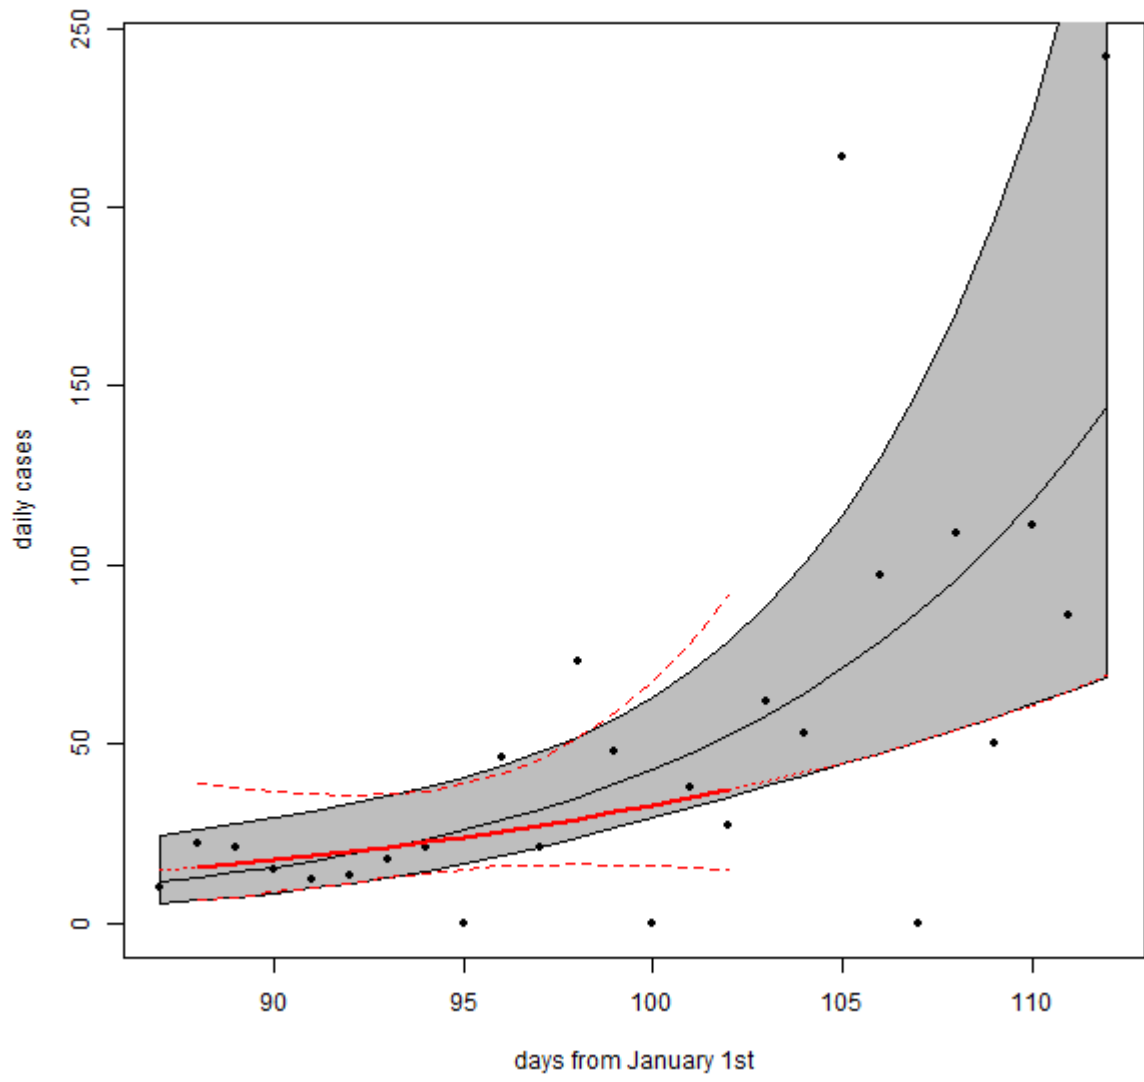

### Pakistan

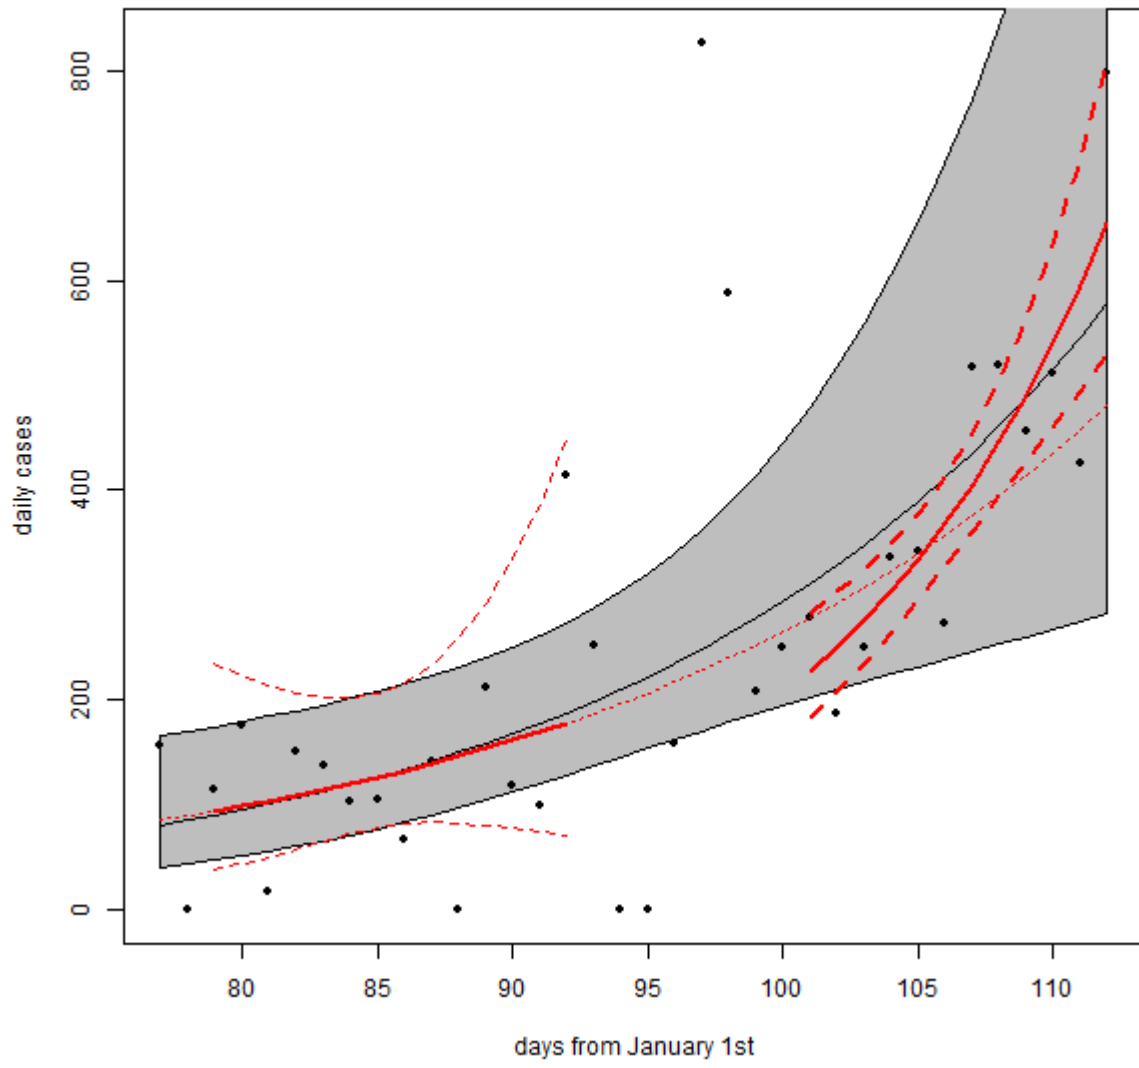

### Pakistan

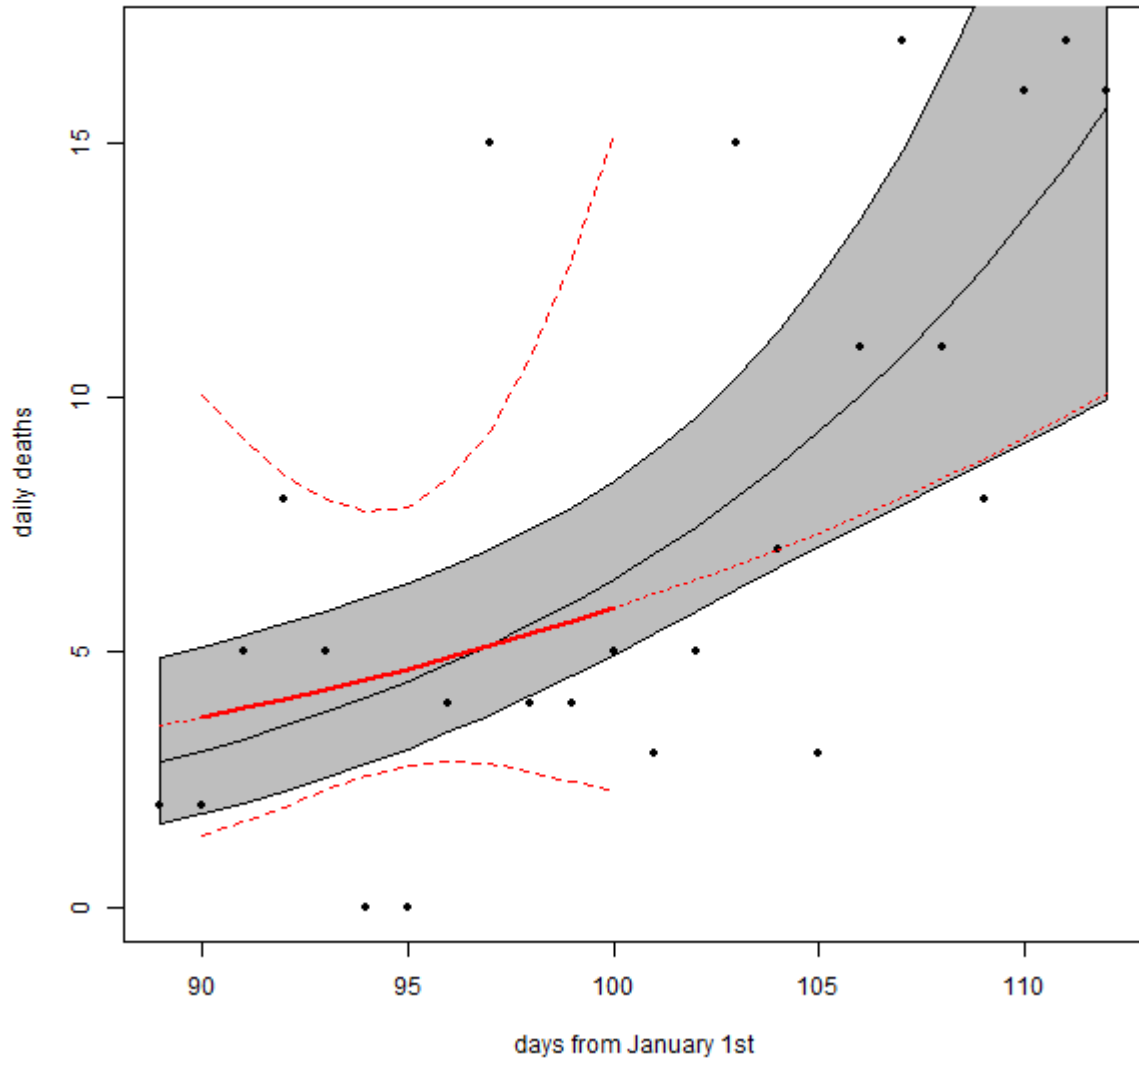

# Panama

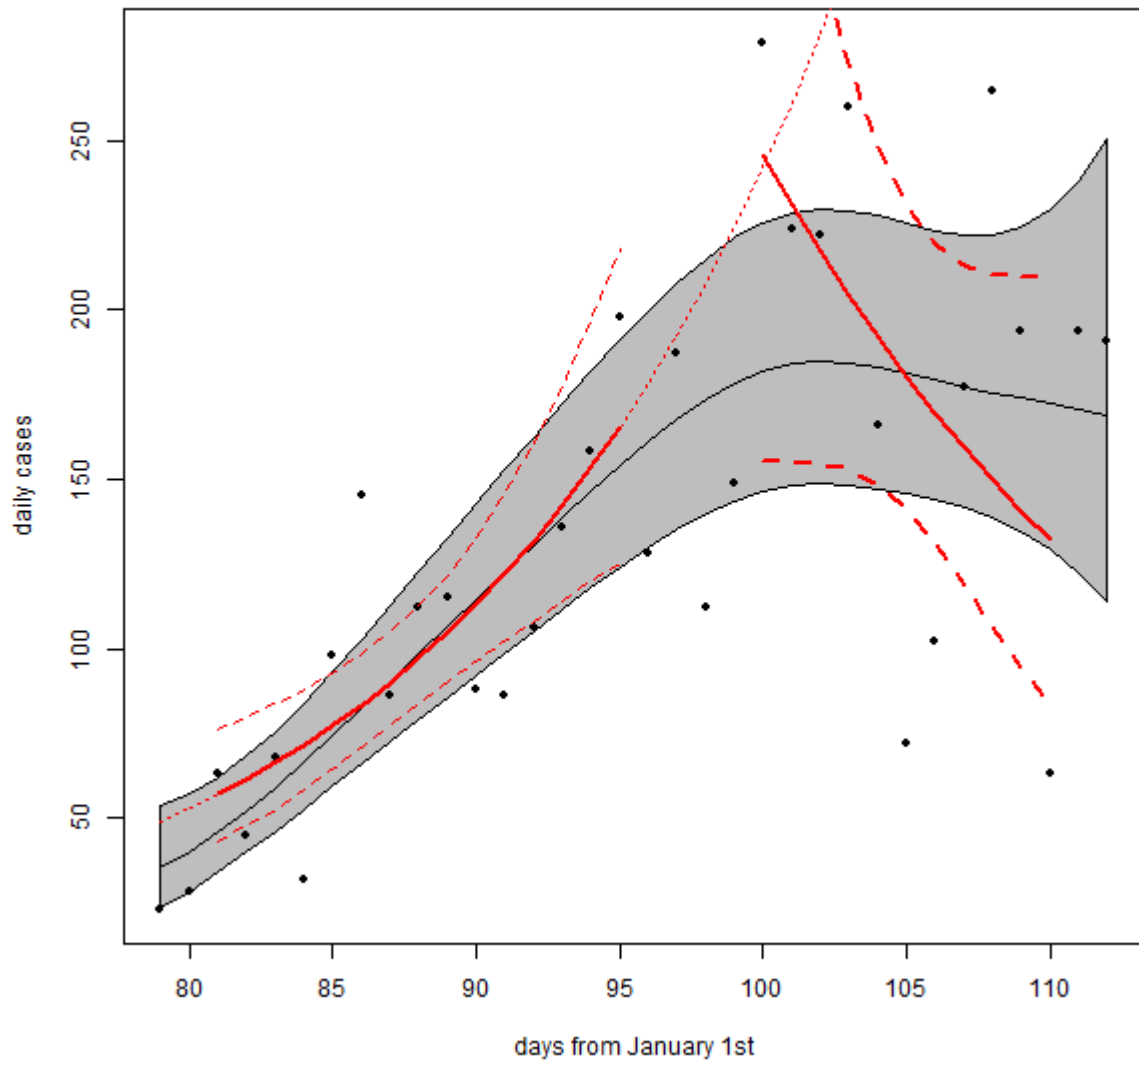

# Panama

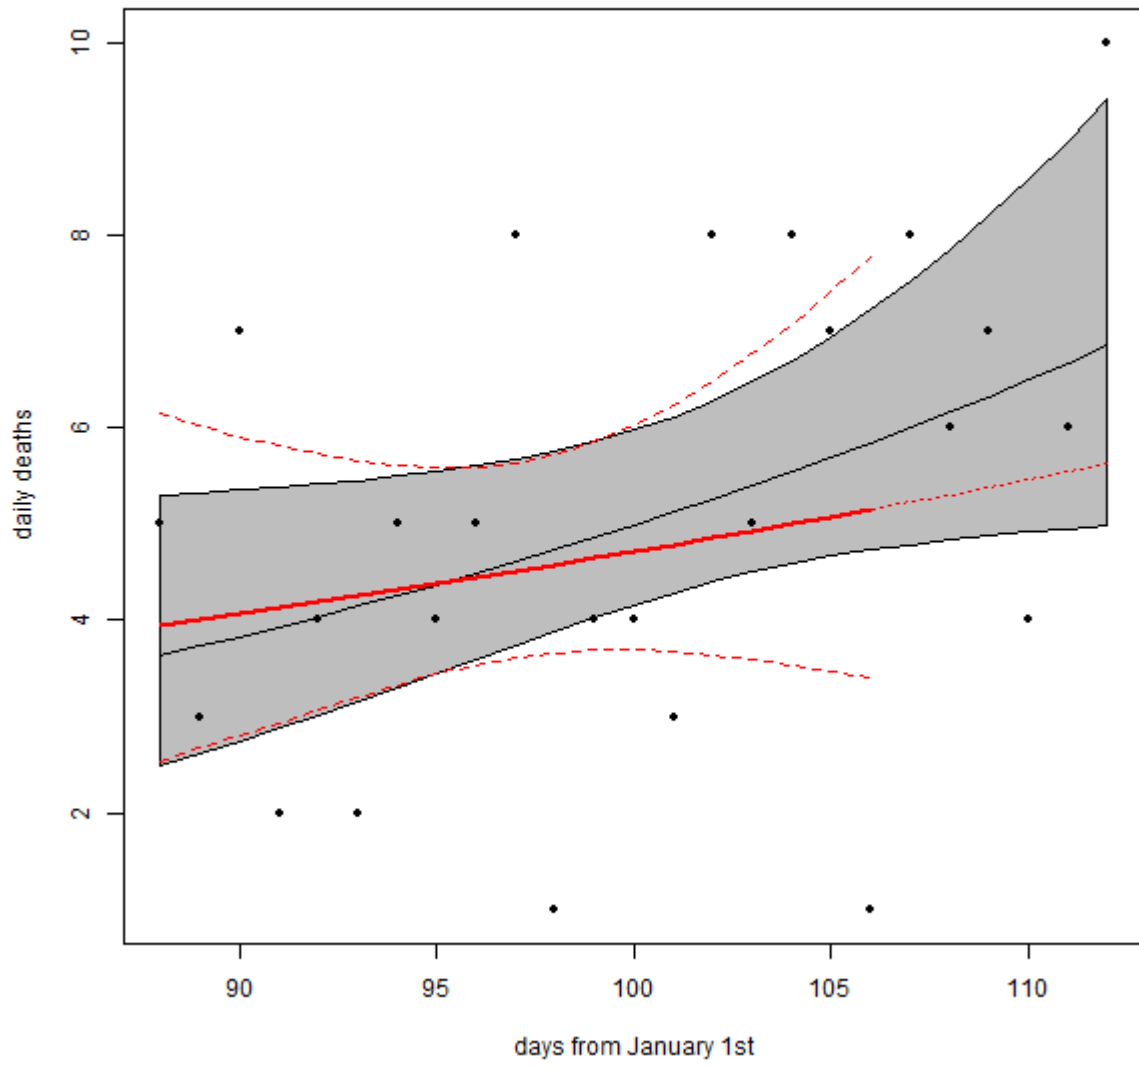

# Peru

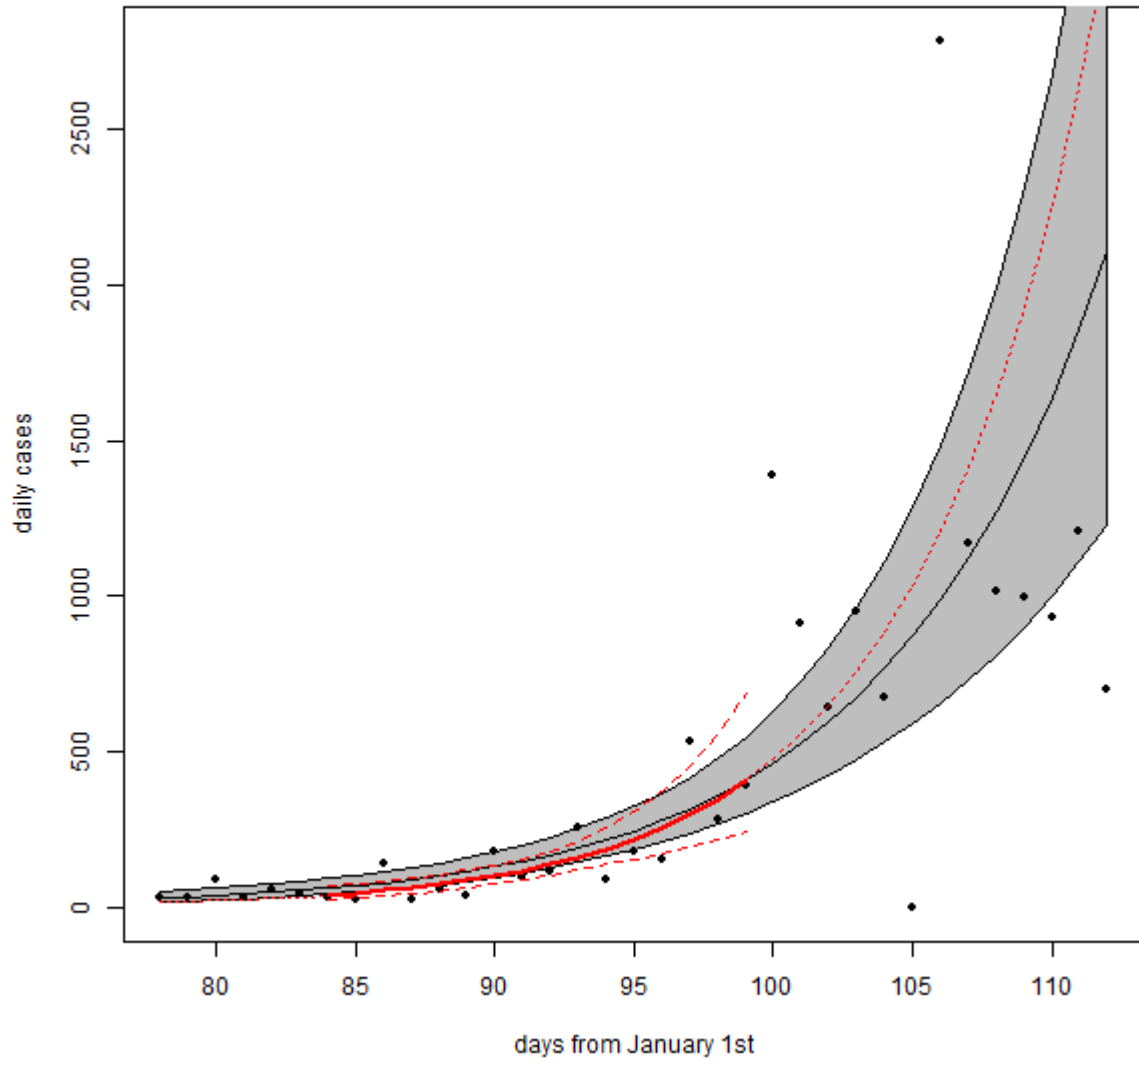

# Peru

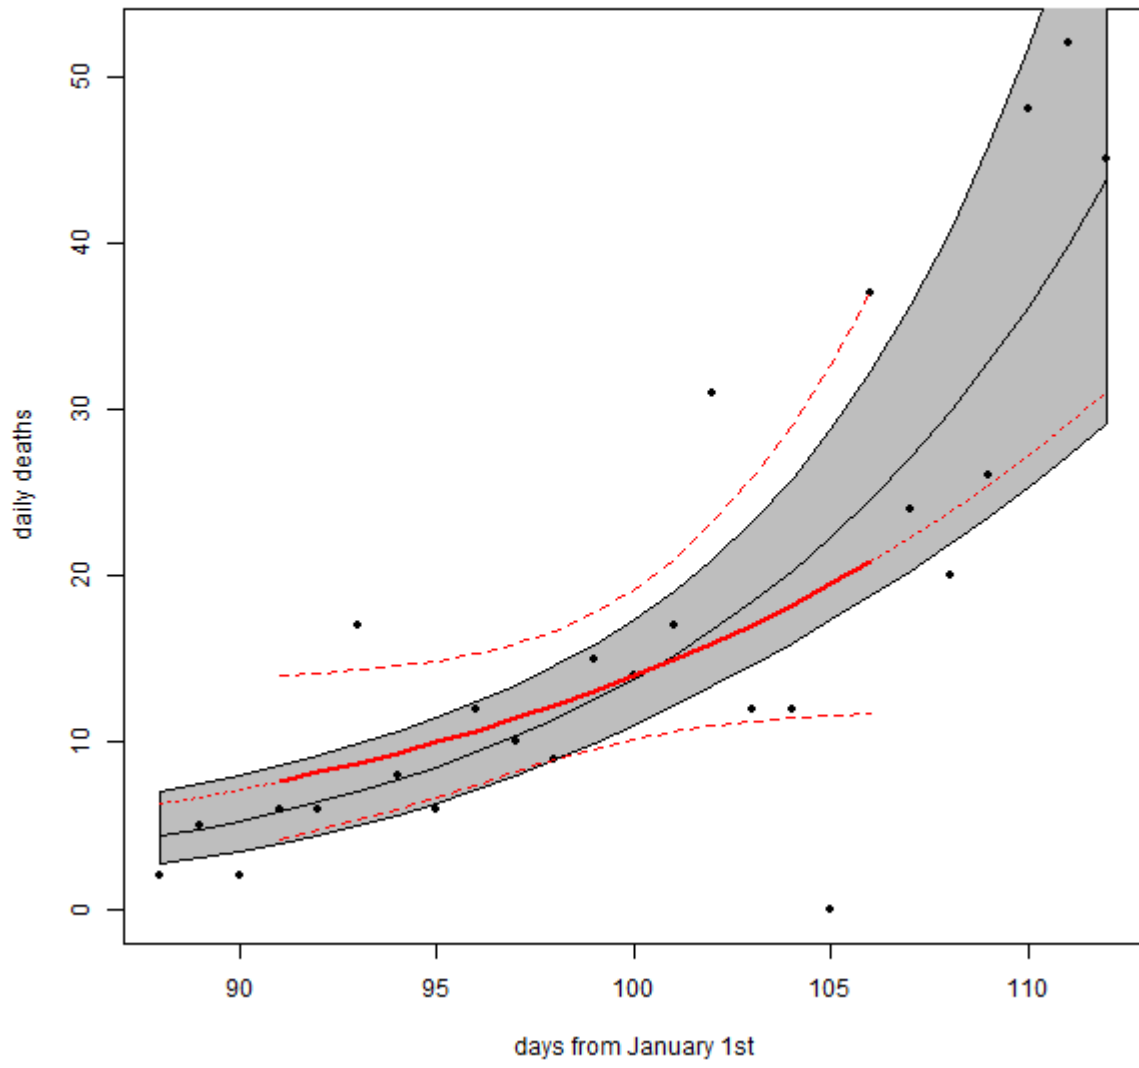



# Philippines

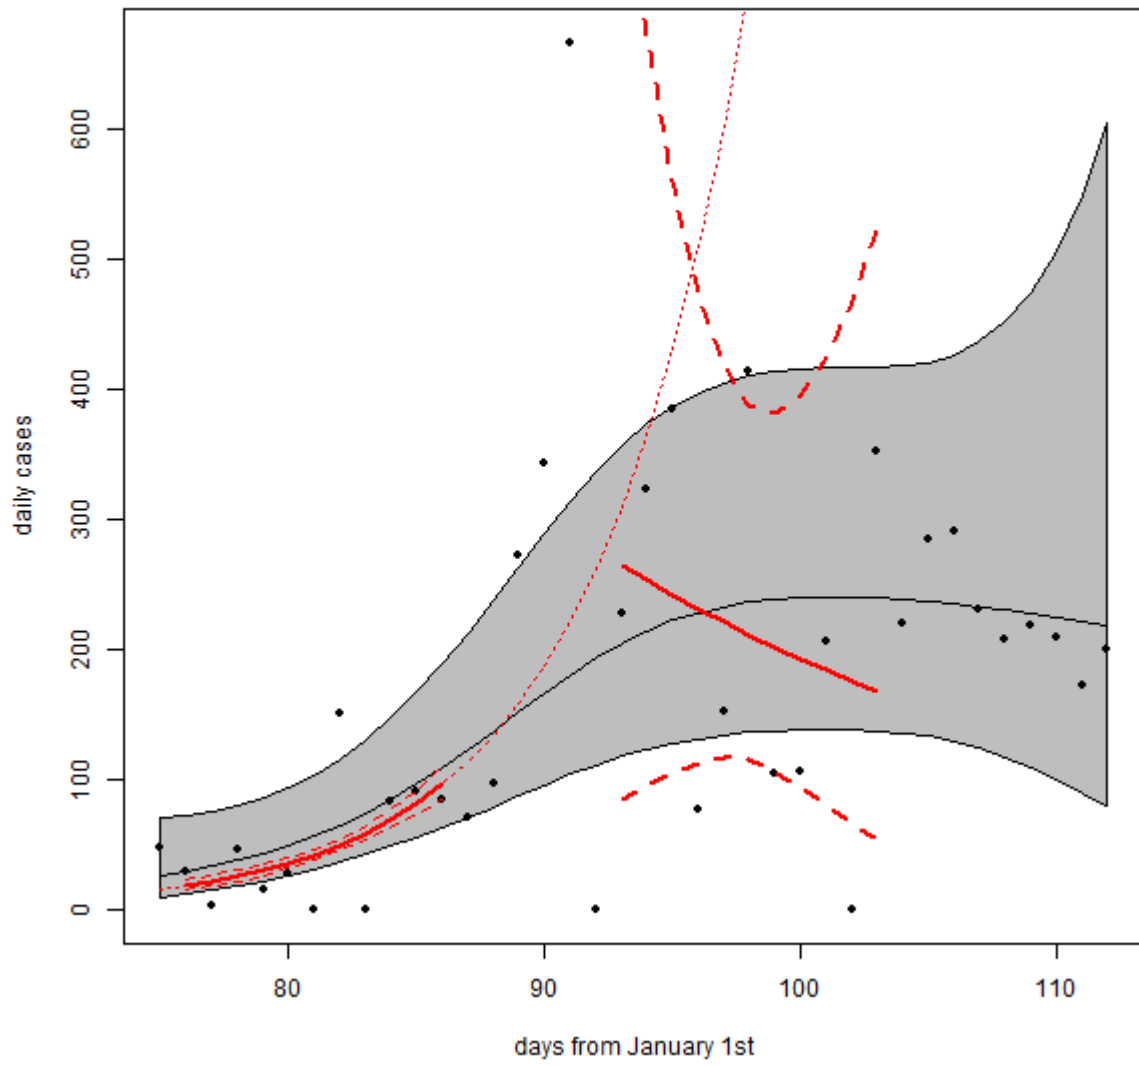

# Philippines

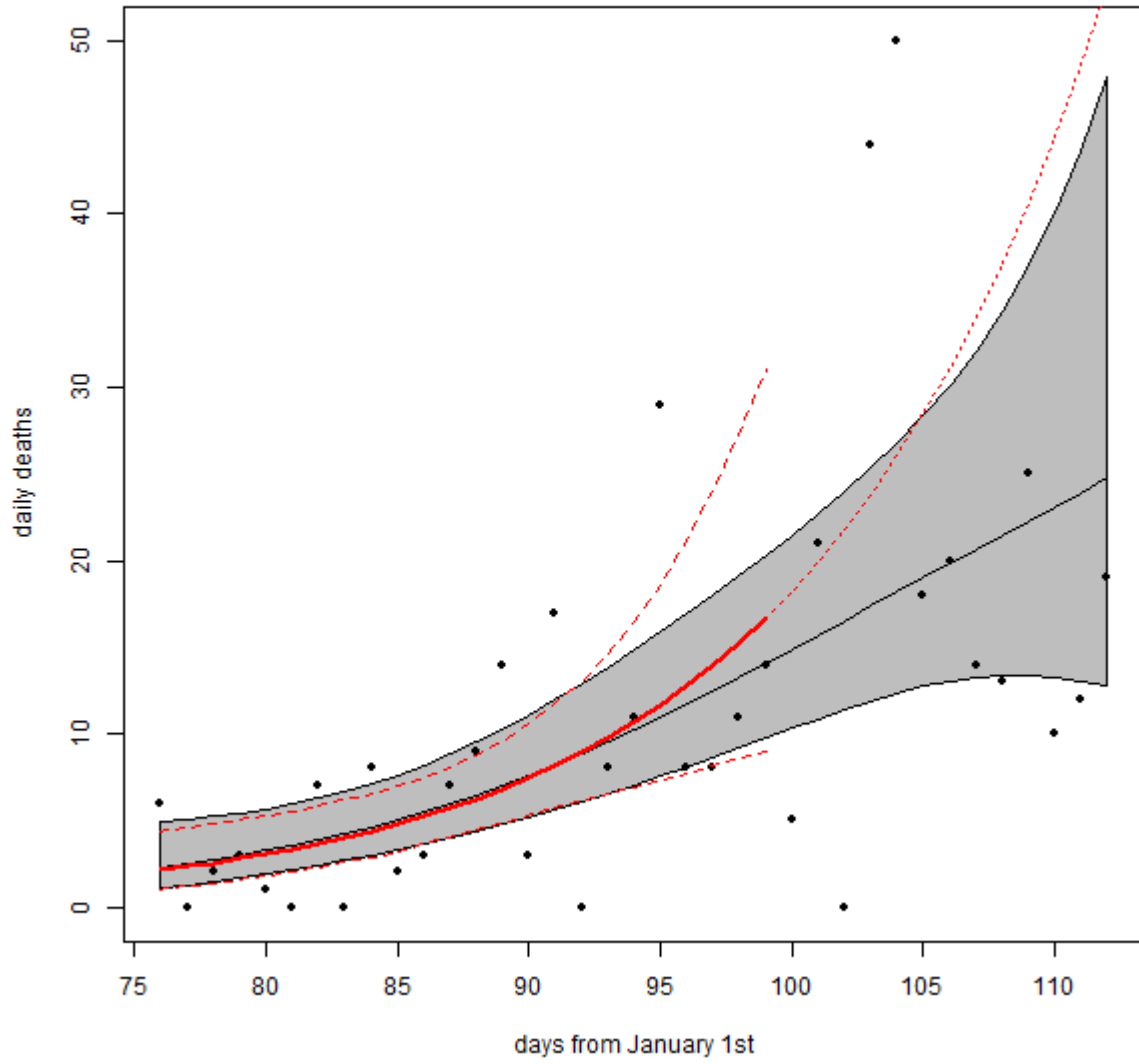

# Poland

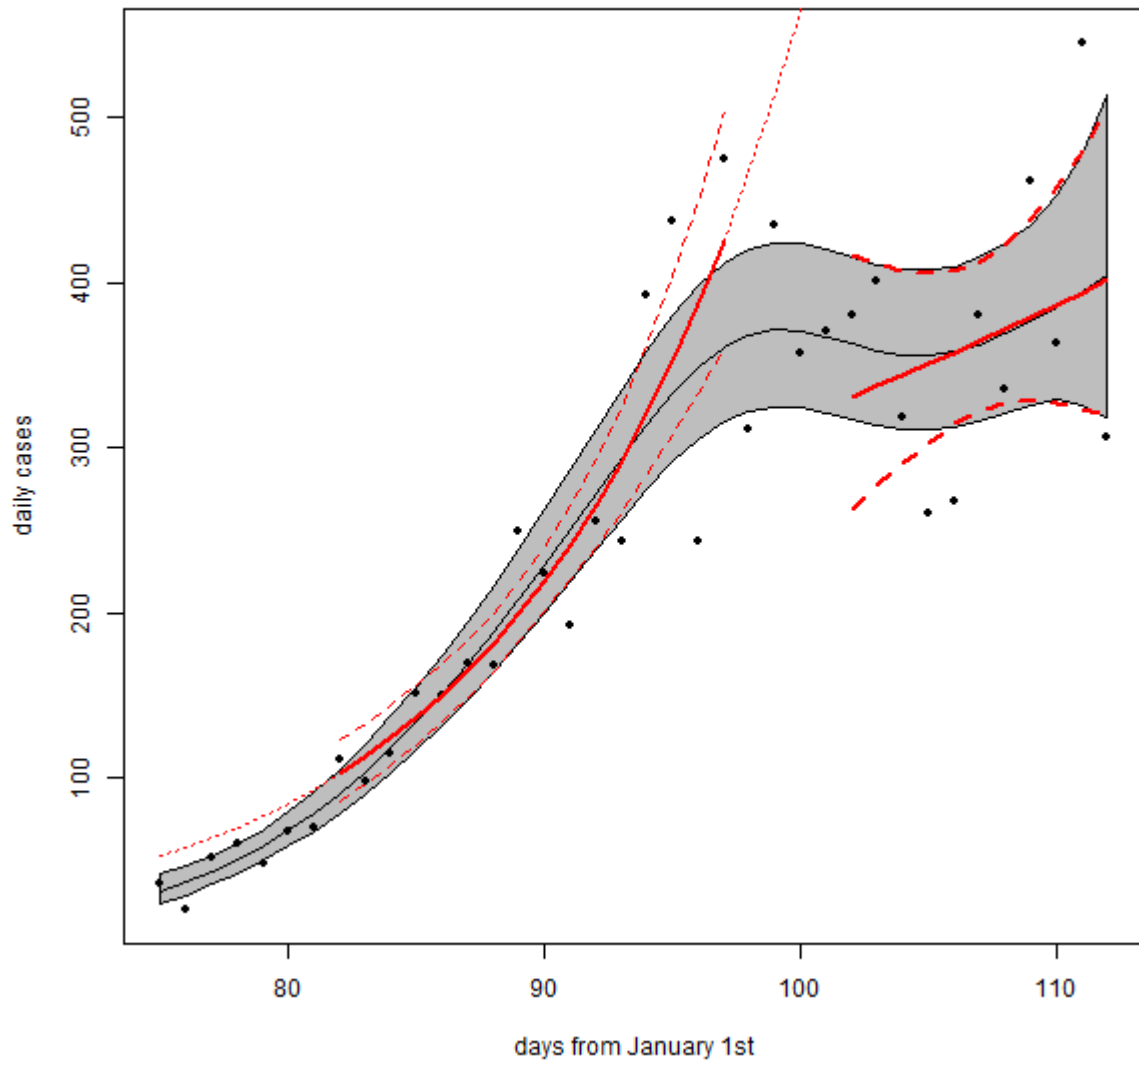

### Portugal

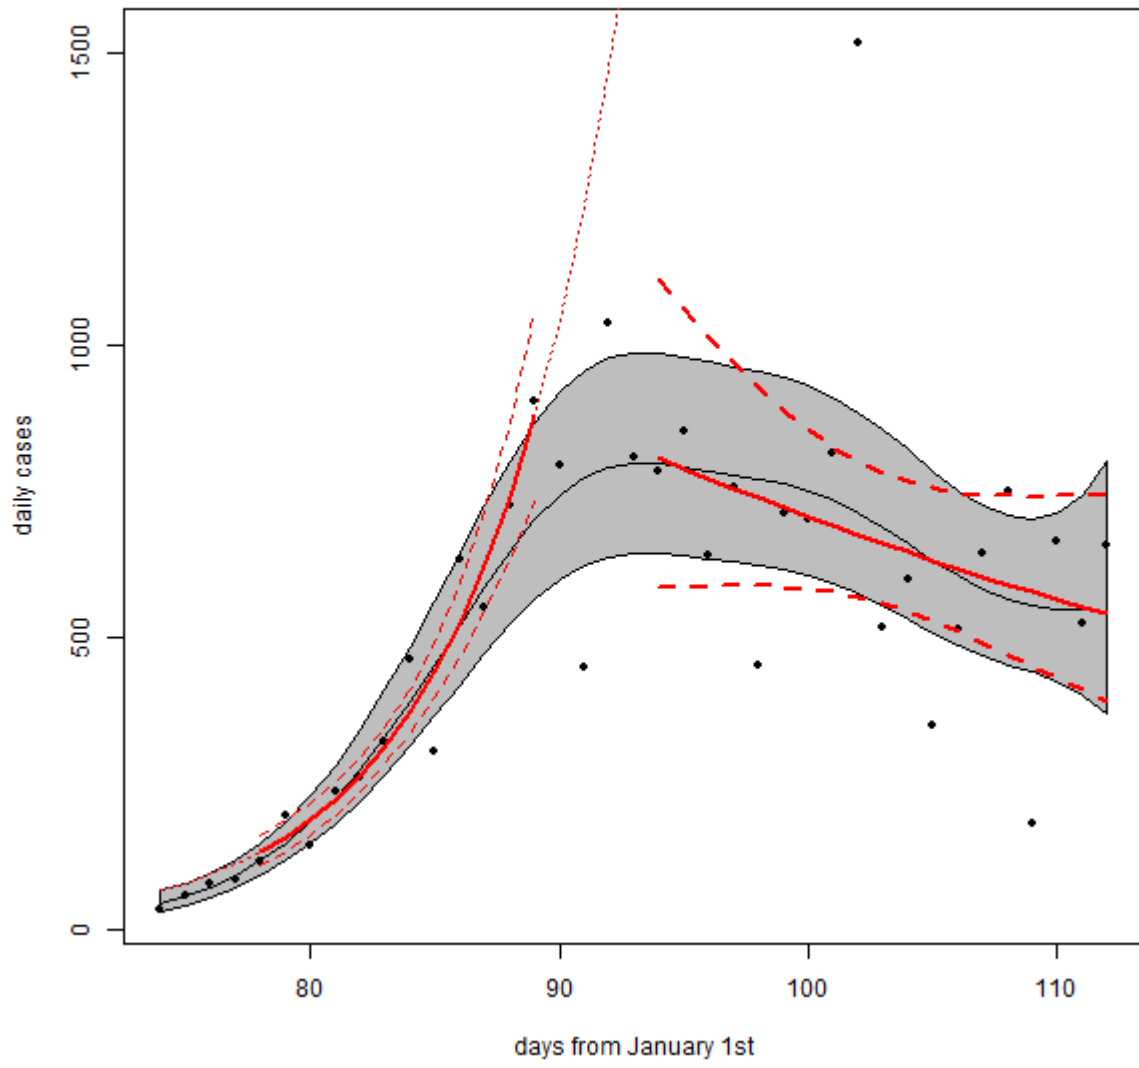

# Qatar

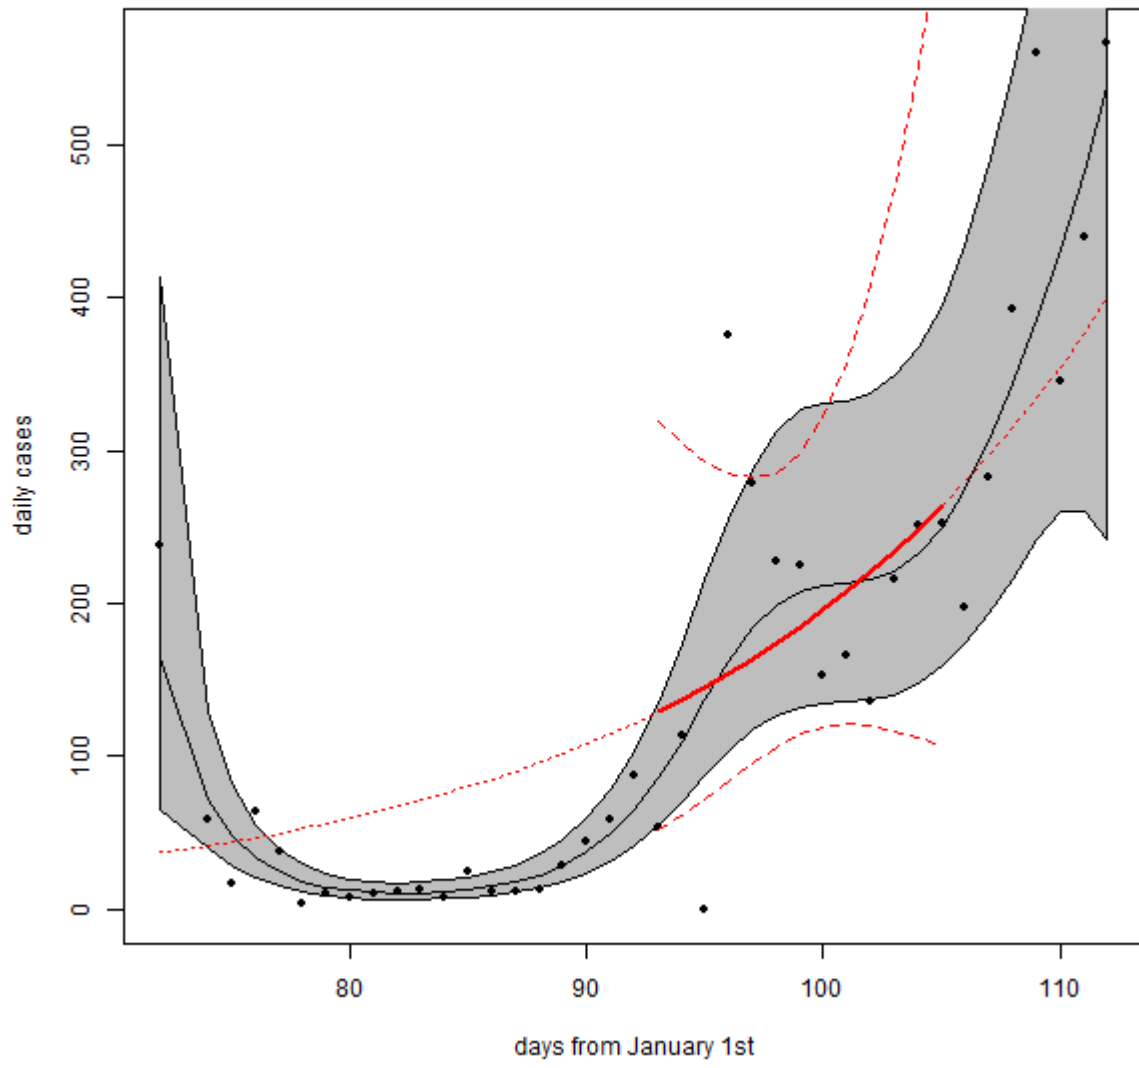

# Romania

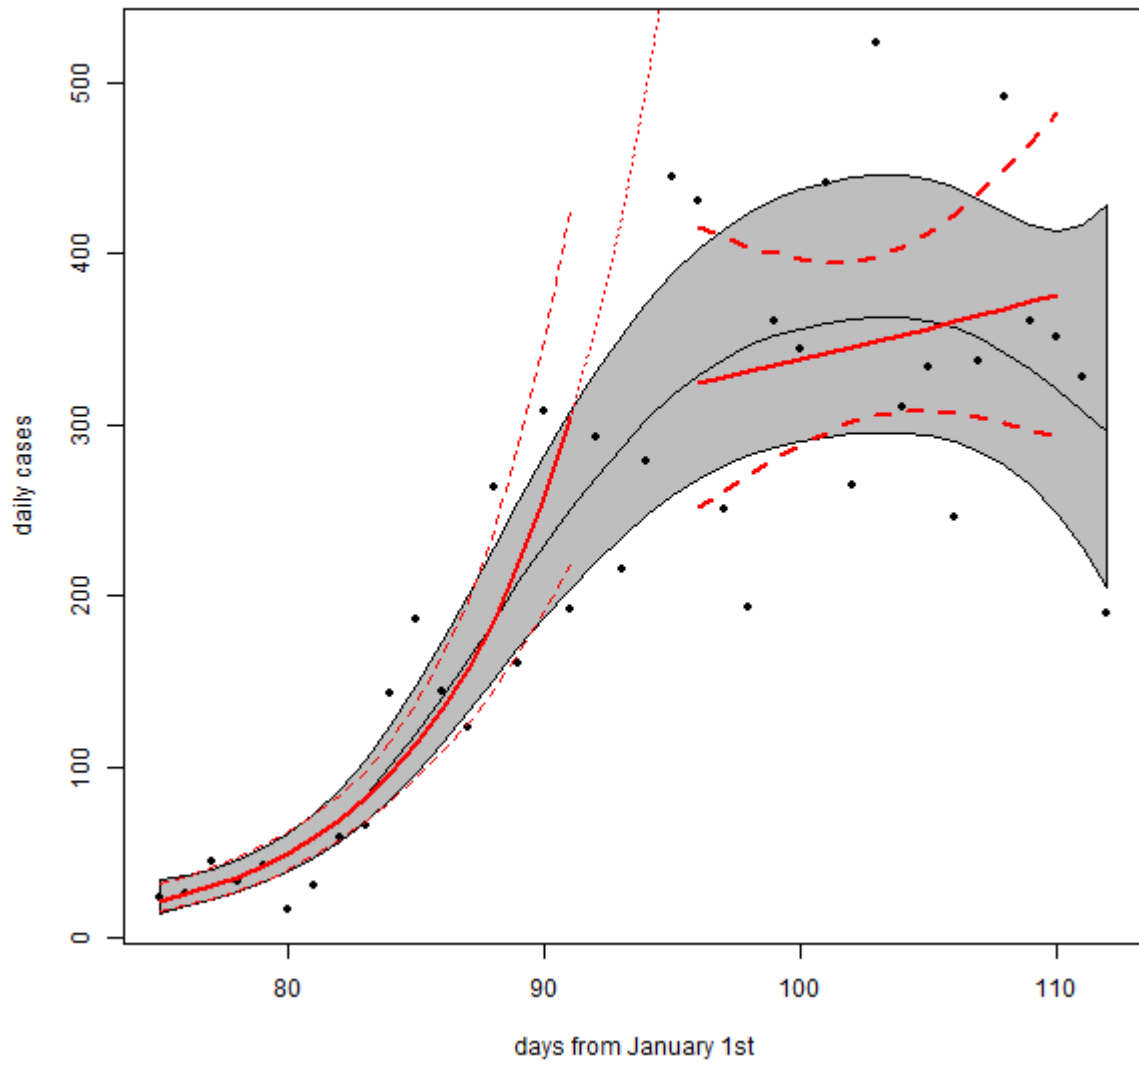

# Russia

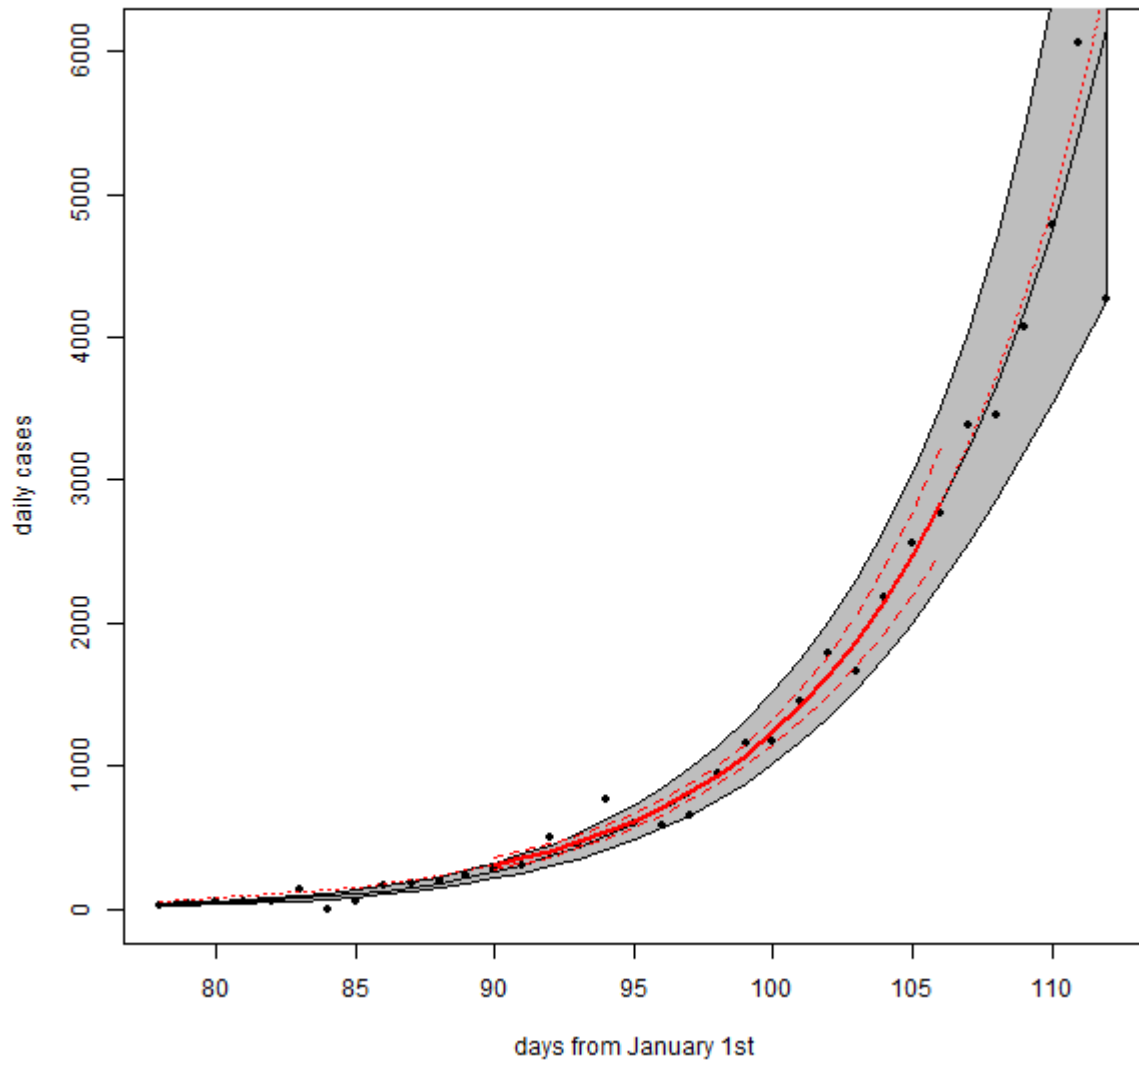

# Russia

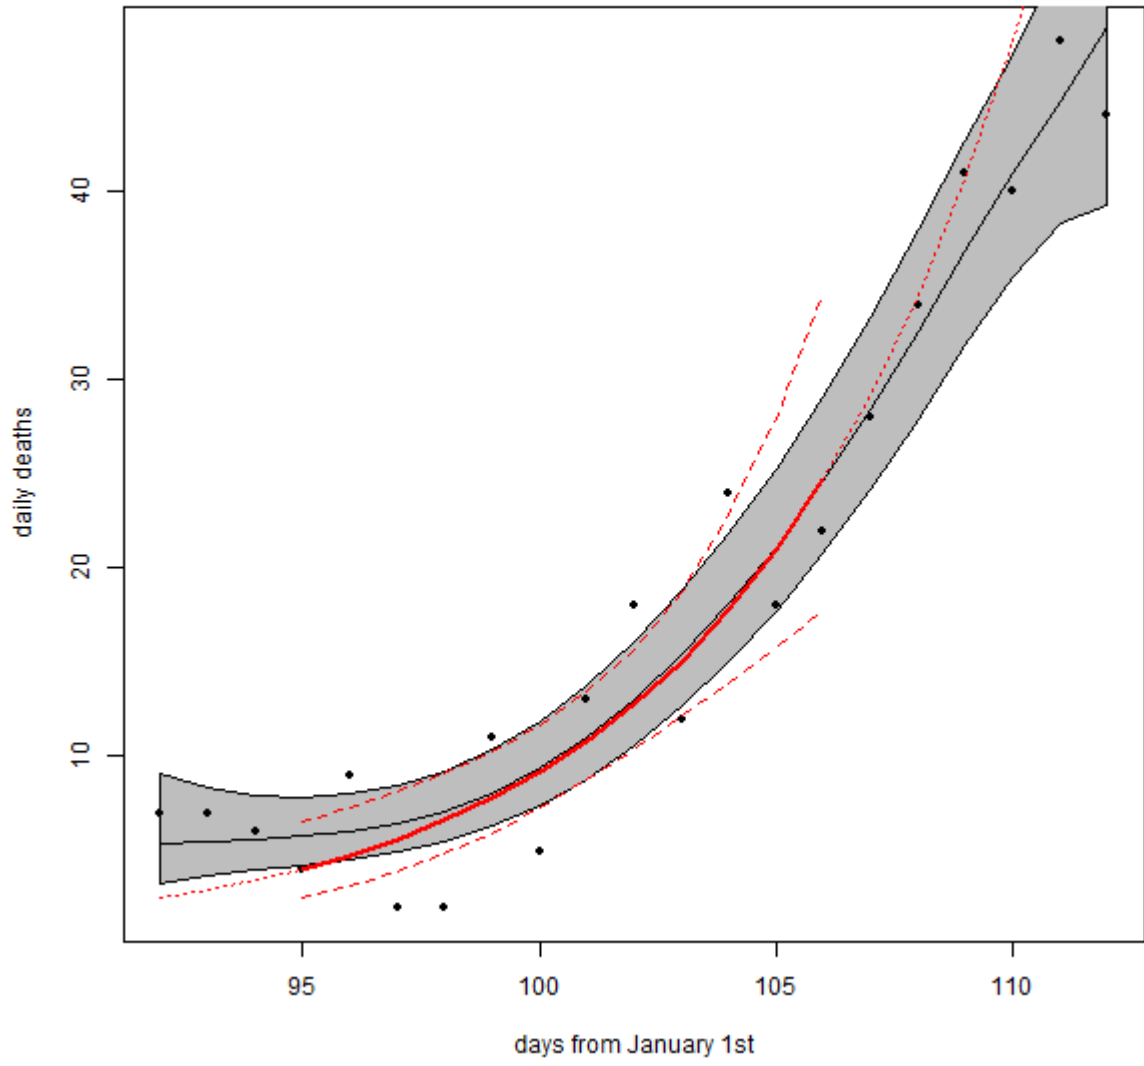



### Saudi\_Arabia

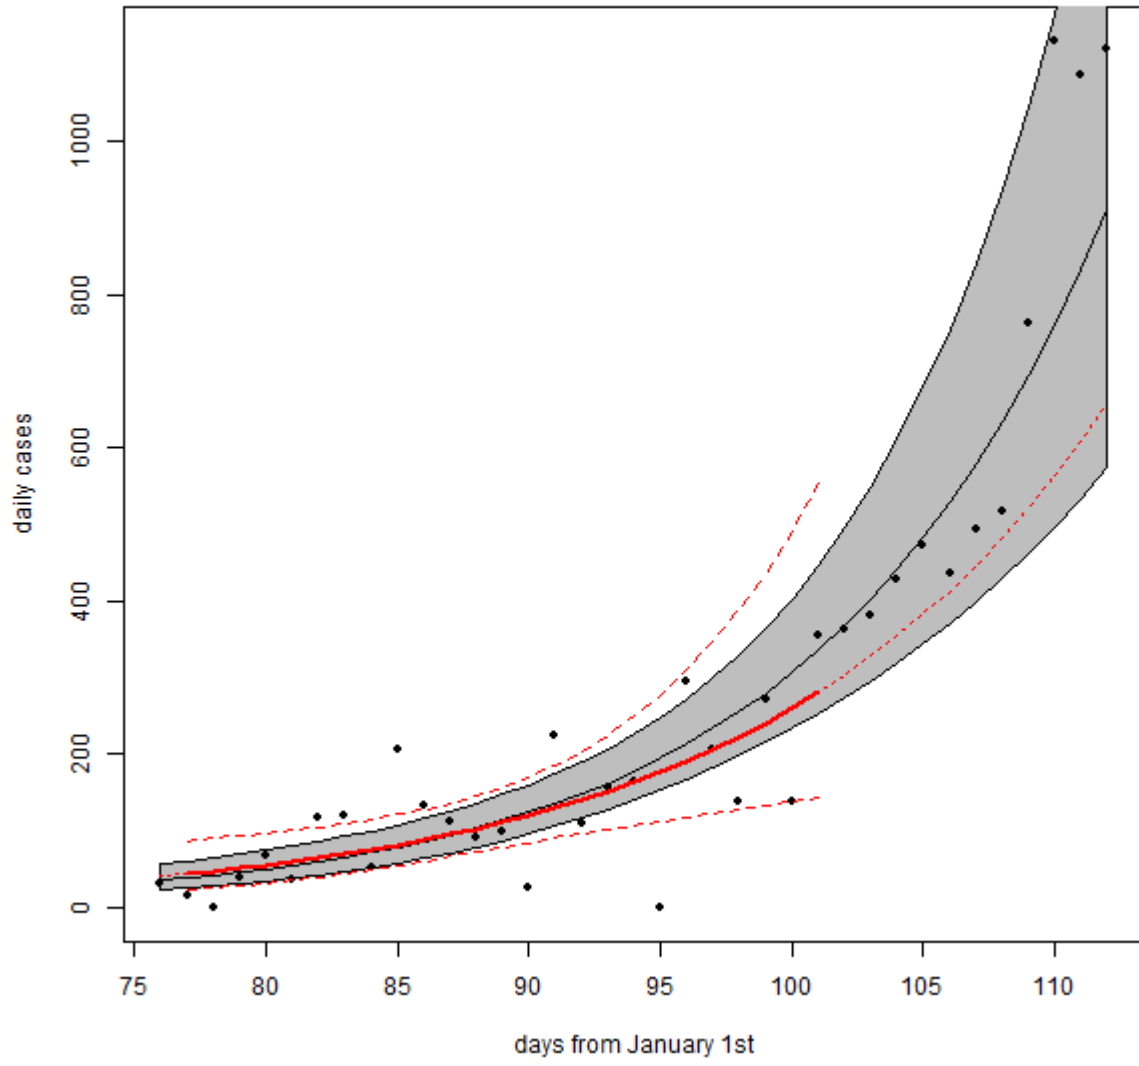

### Serbia

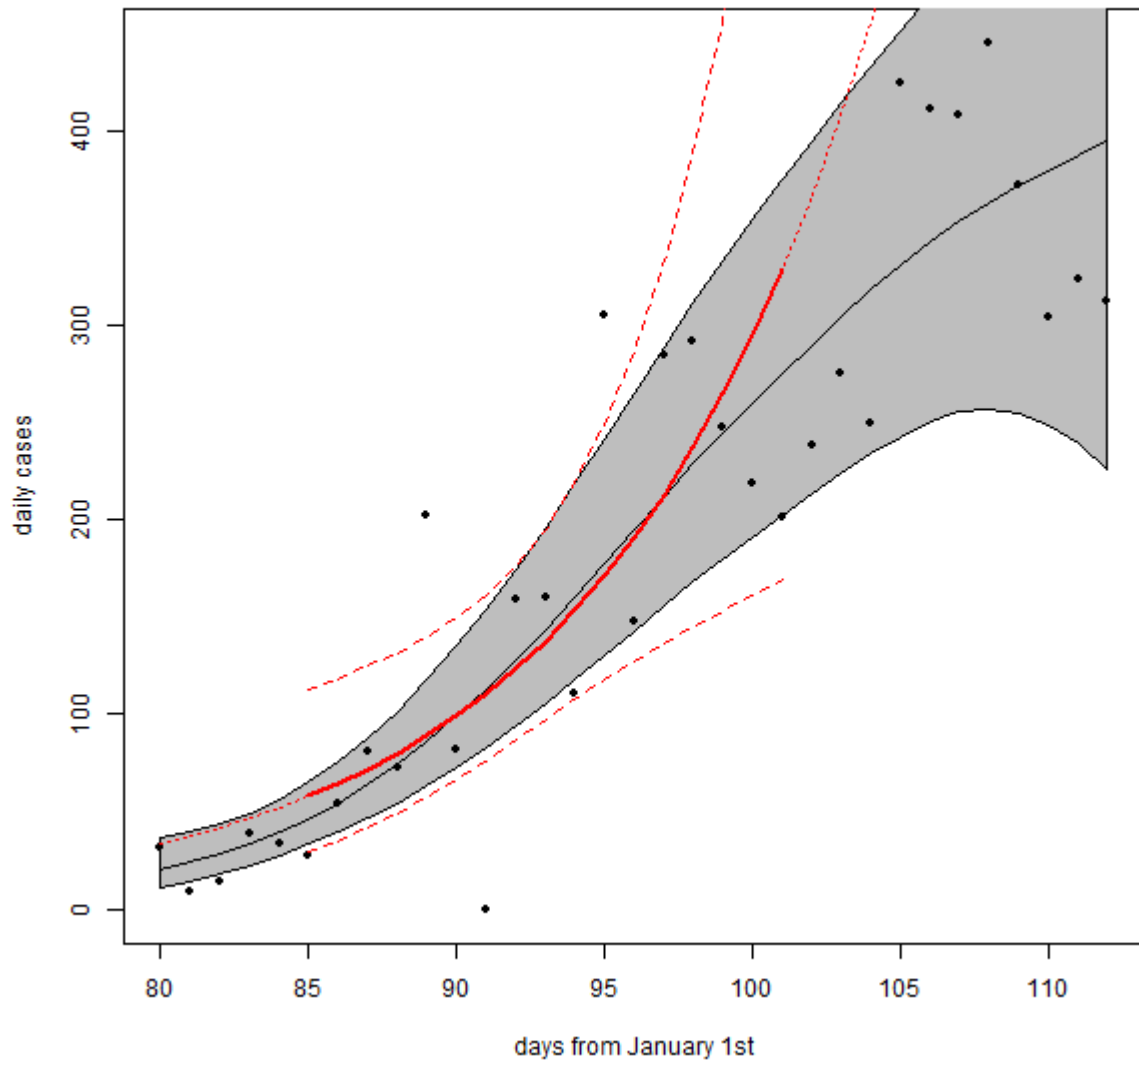

# Singapore

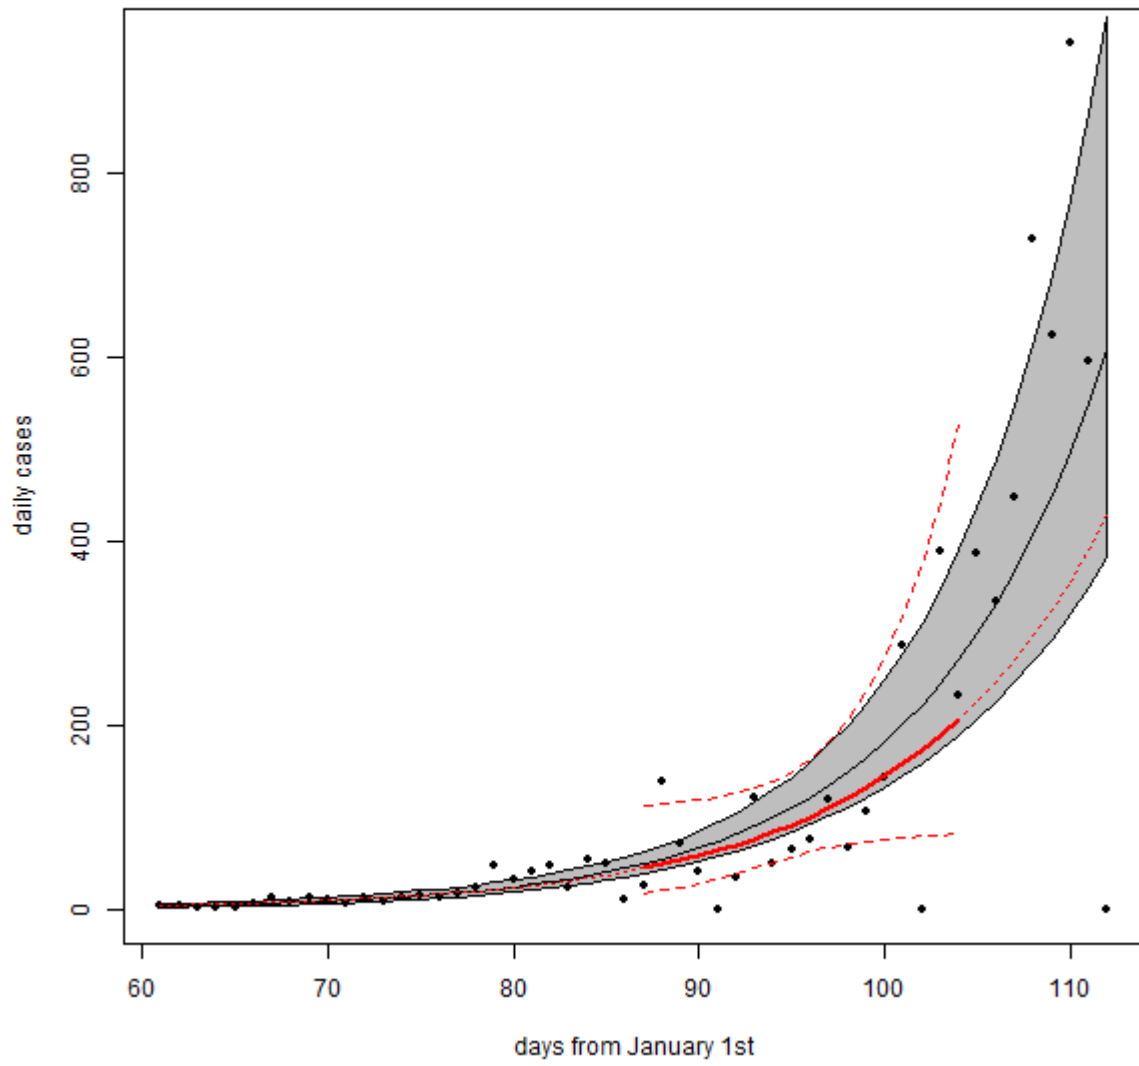

### Slovakia

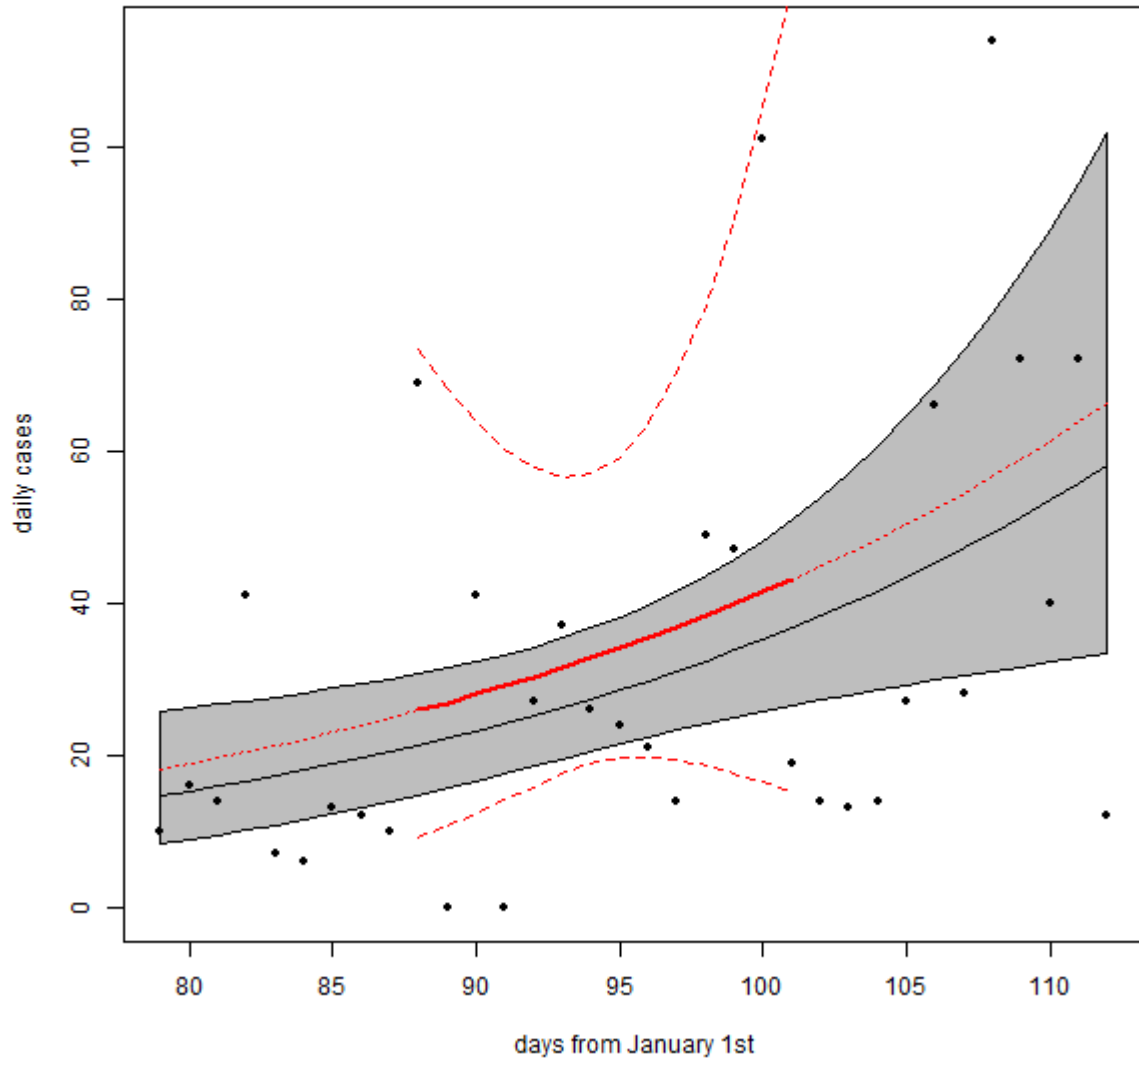

### South\_Africa

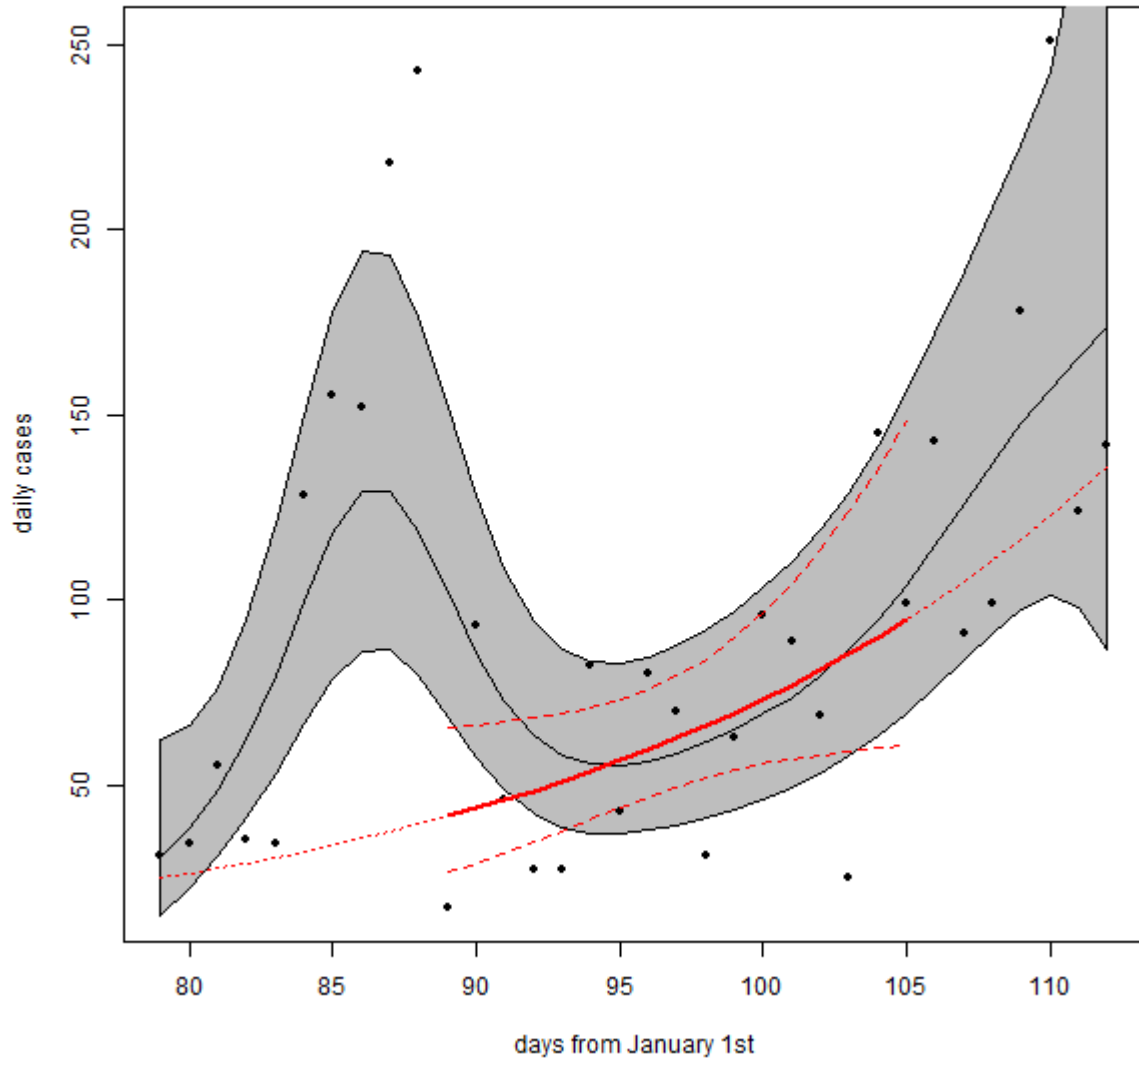

### South\_Korea

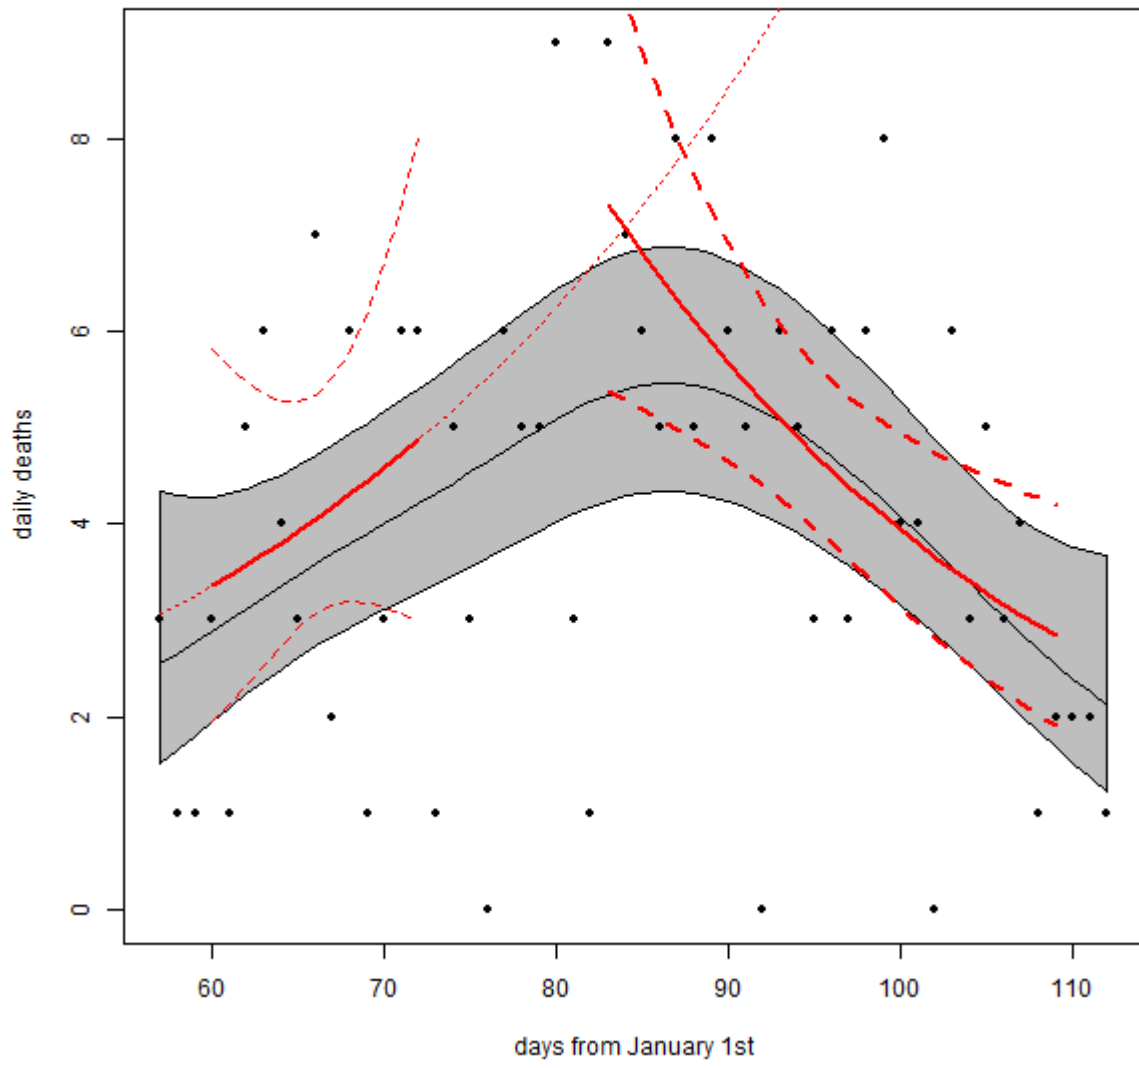

# Spain

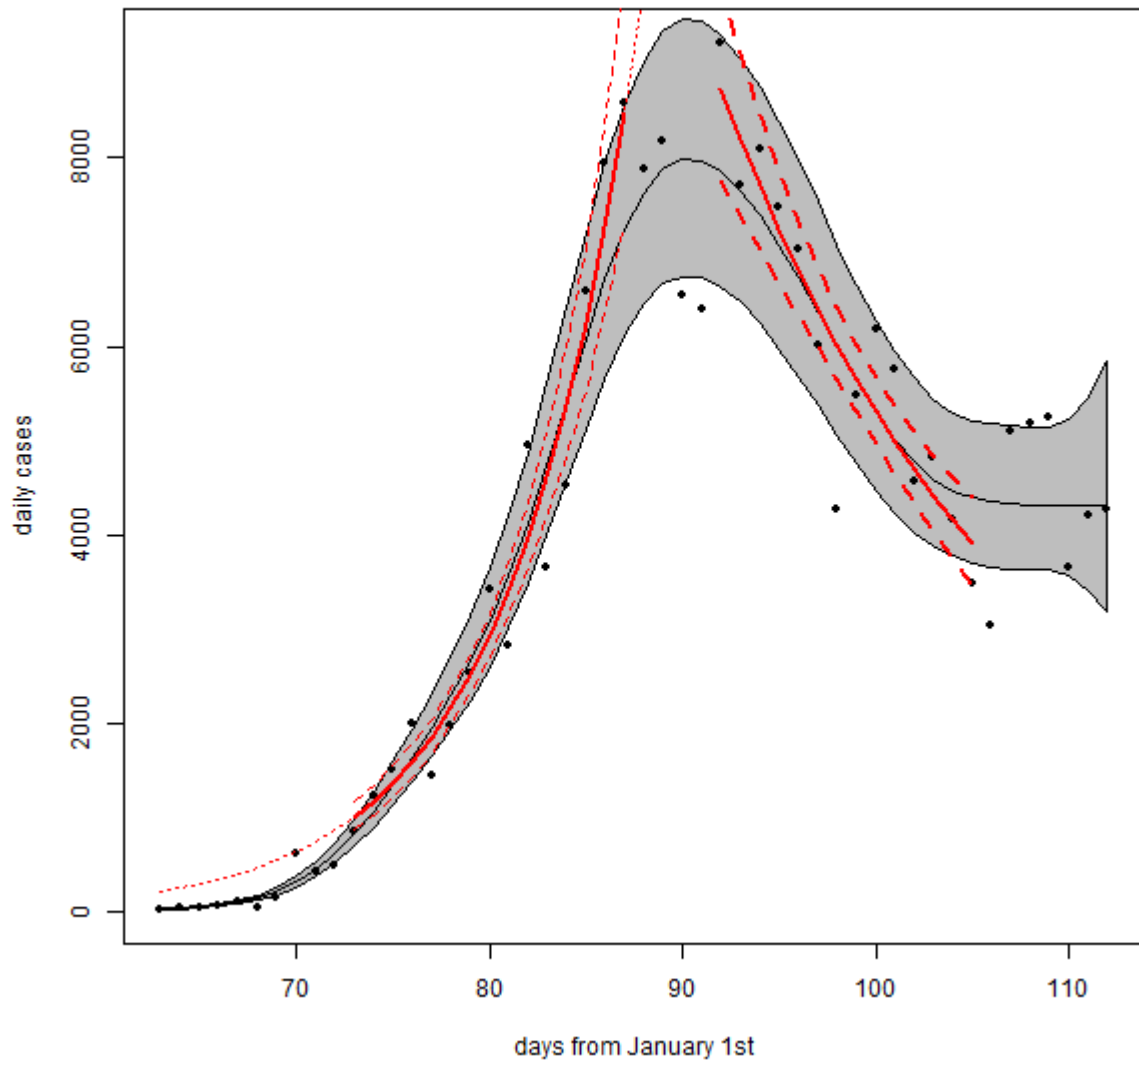

# Spain

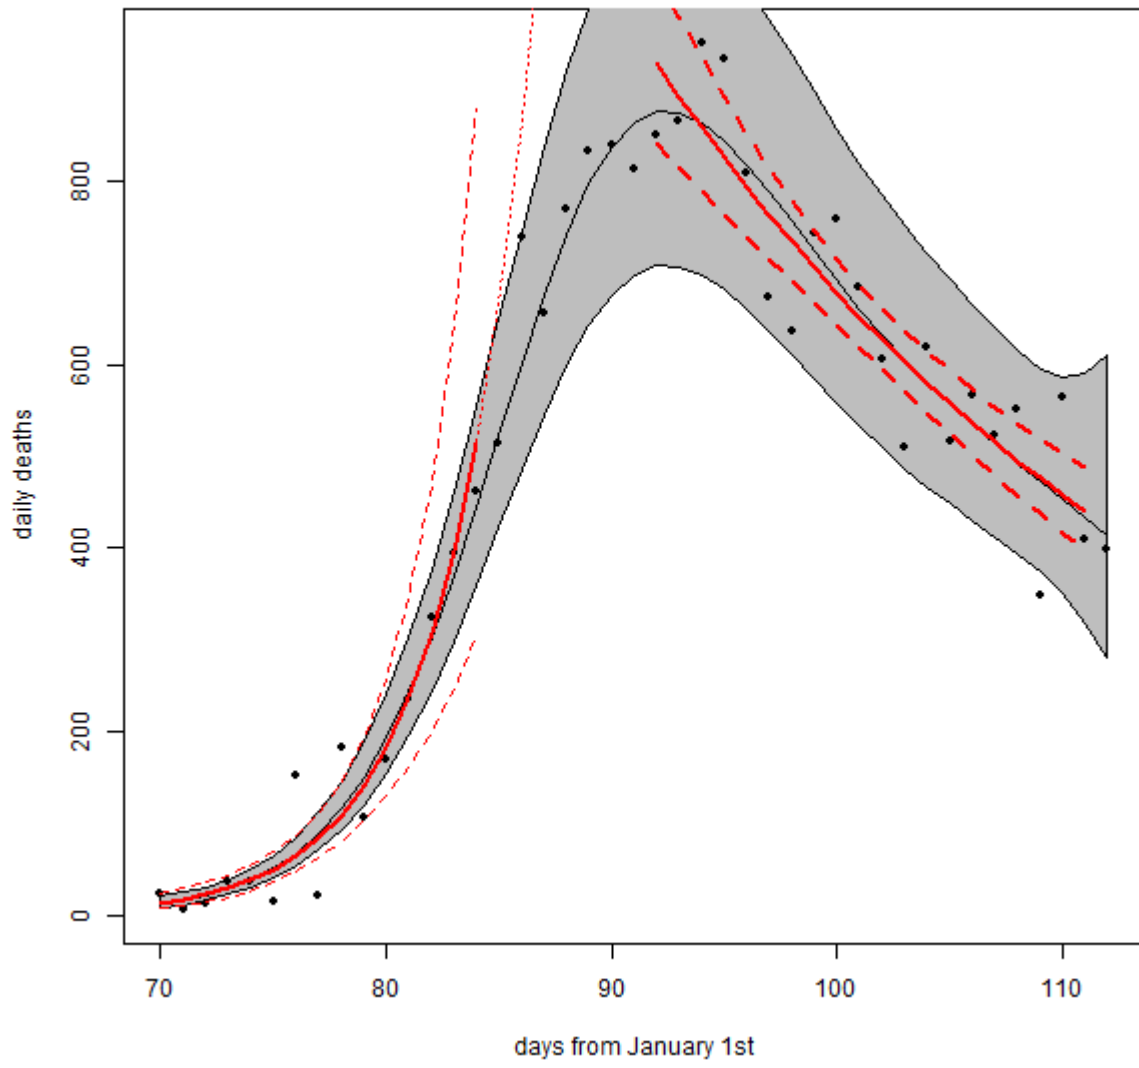



### Sweden

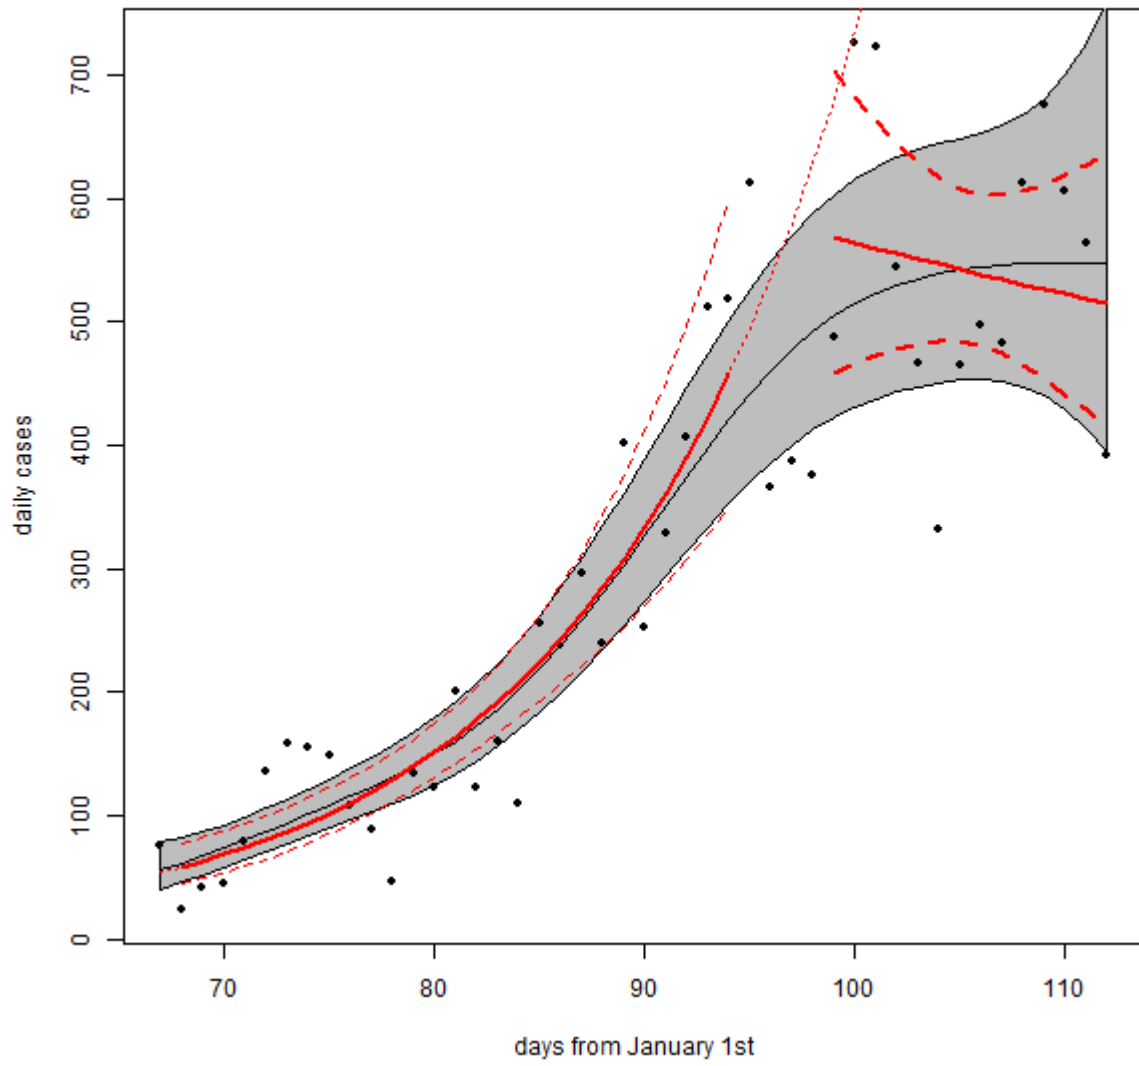

### Sweden

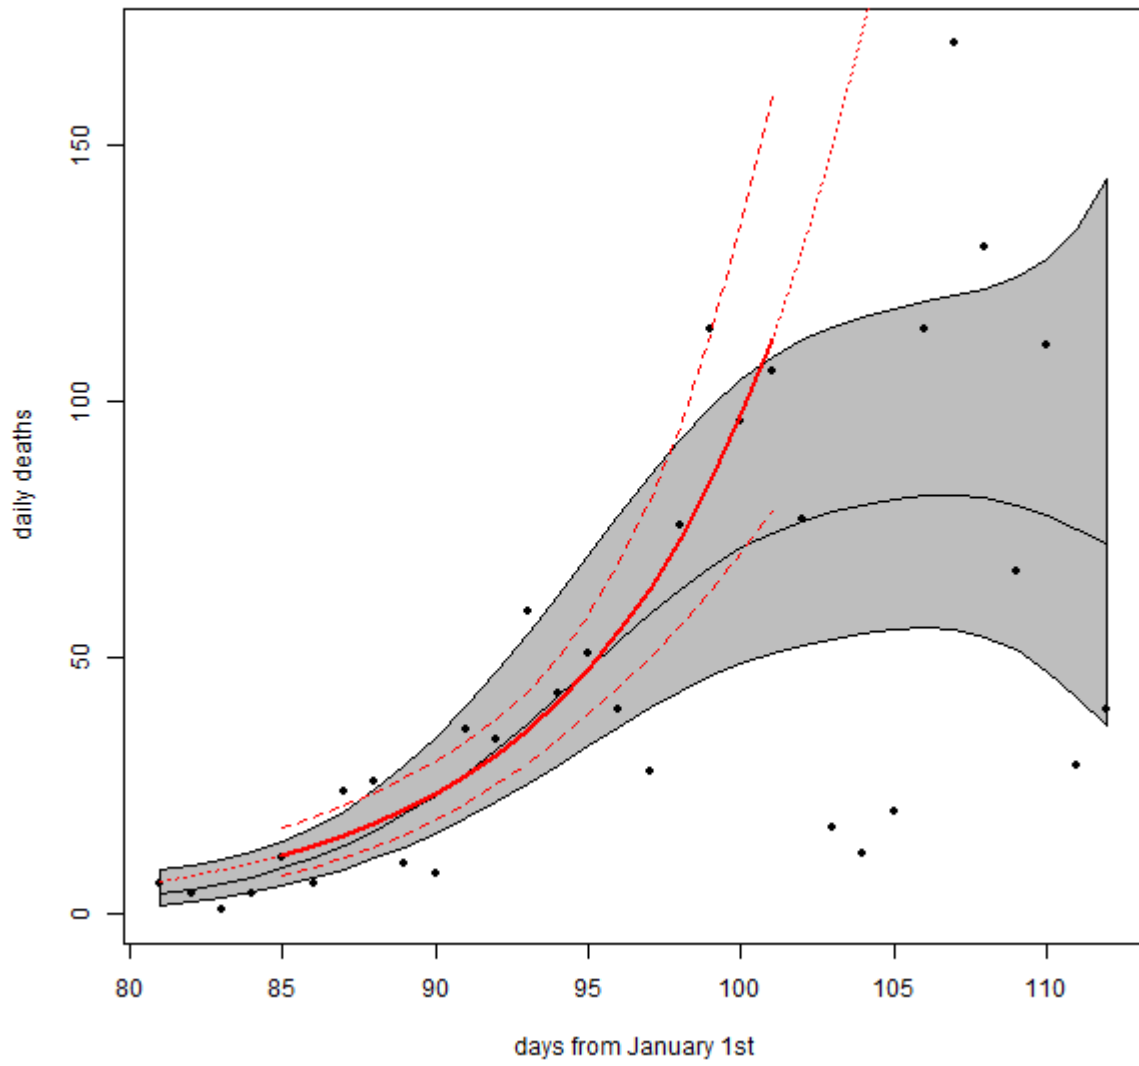

### Switzerland

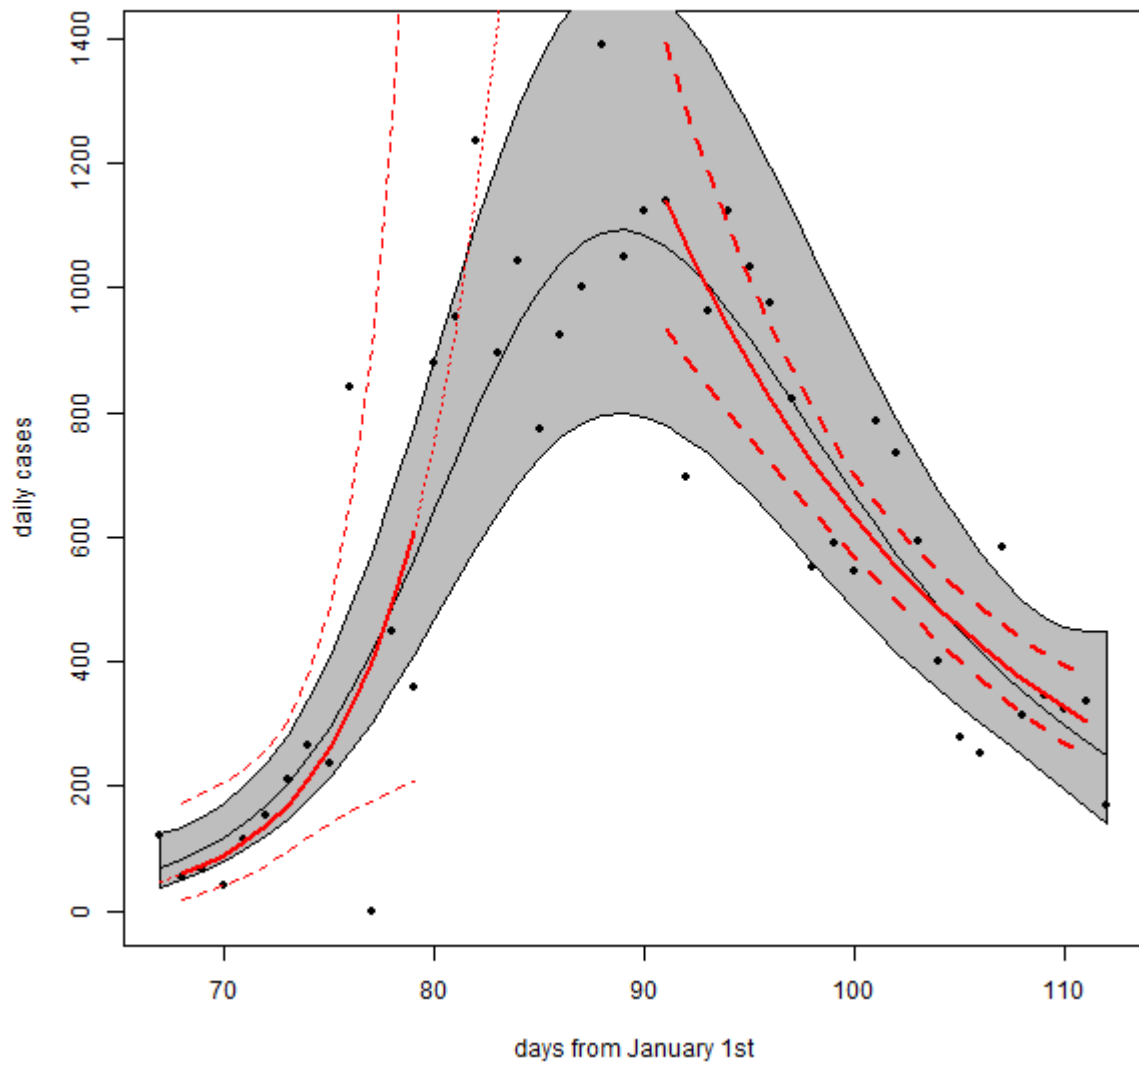

### Switzerland

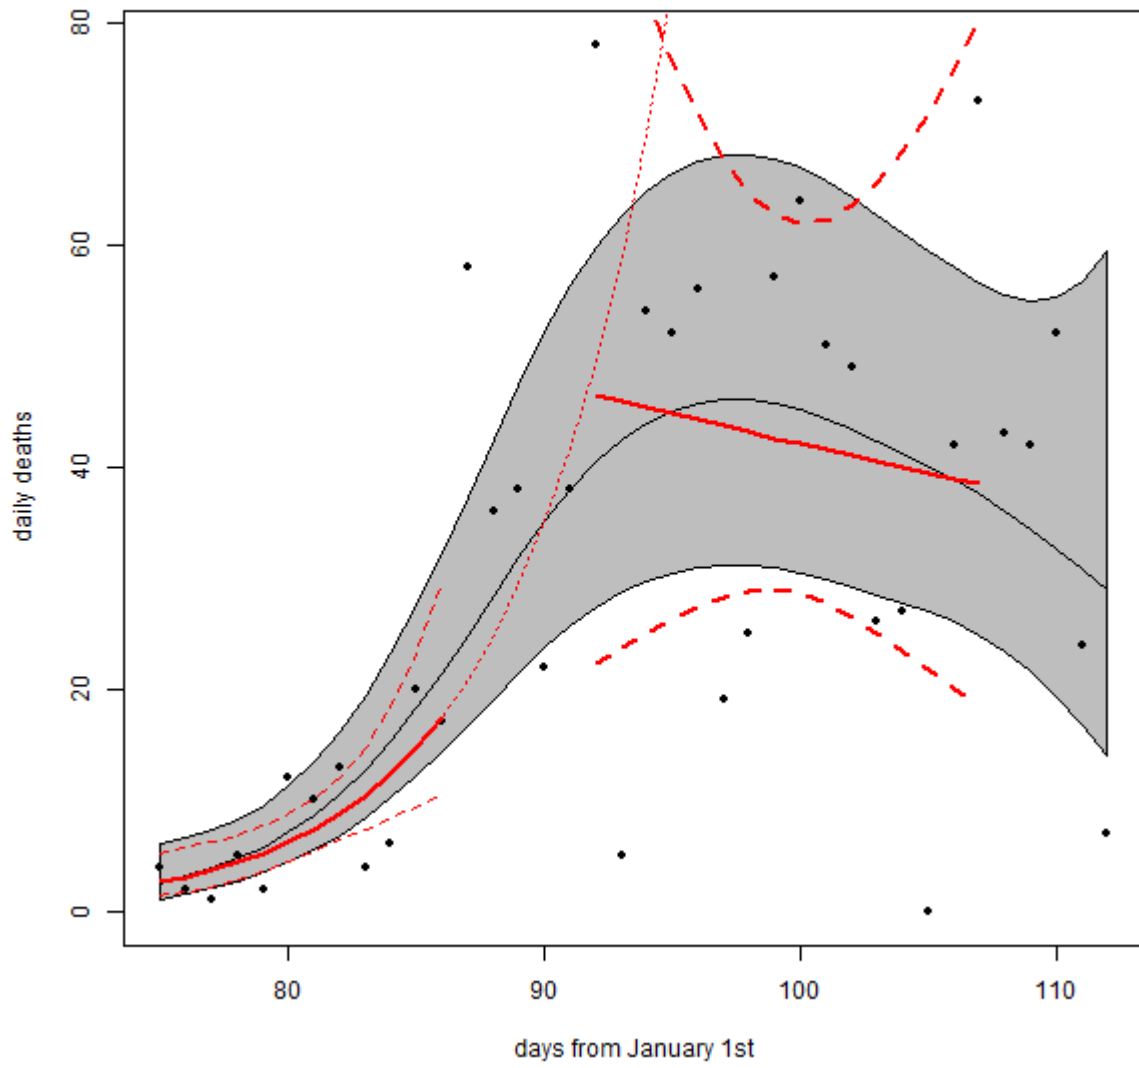

# Turkey

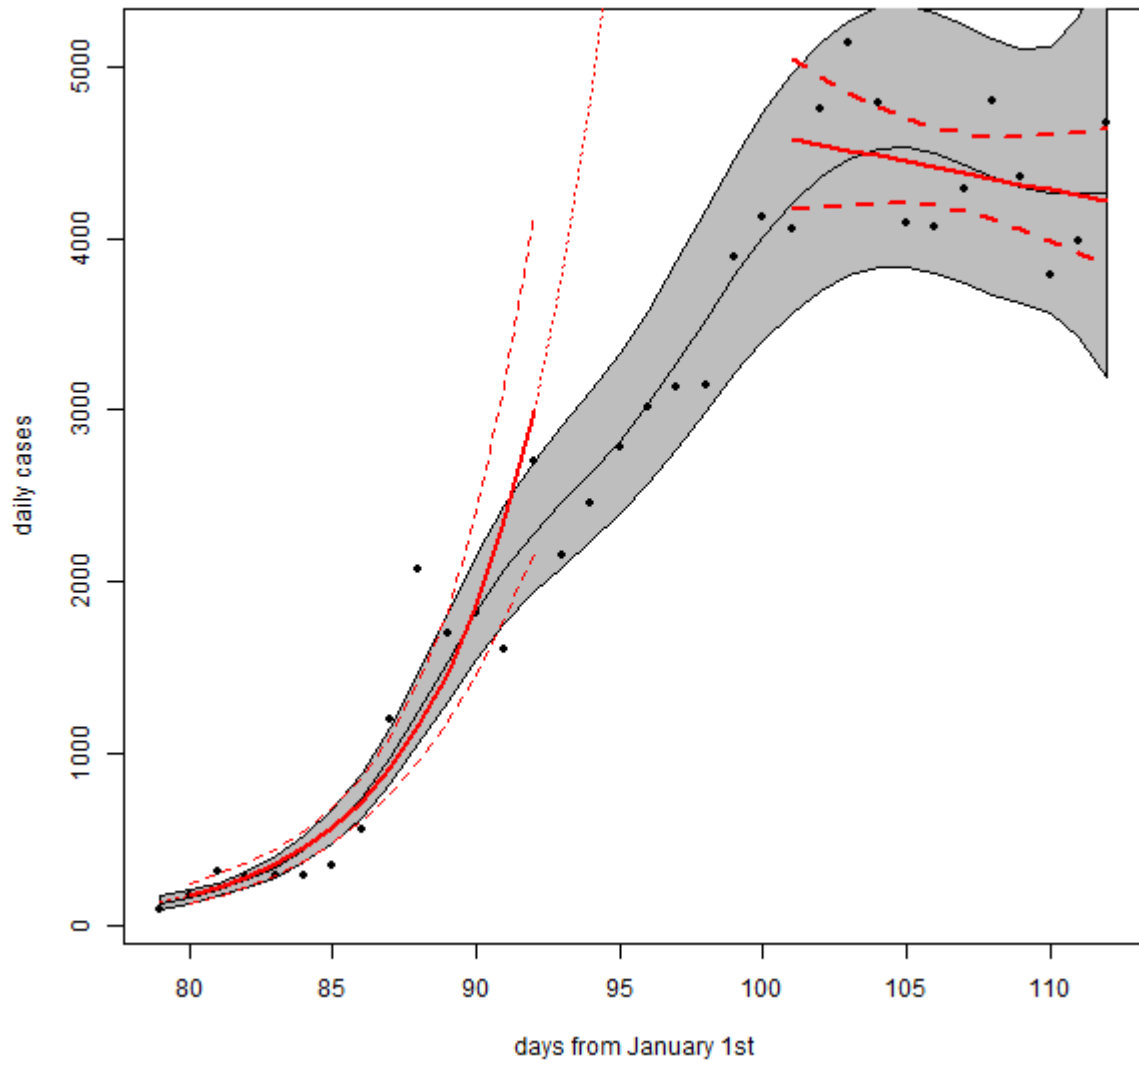

# Turkey

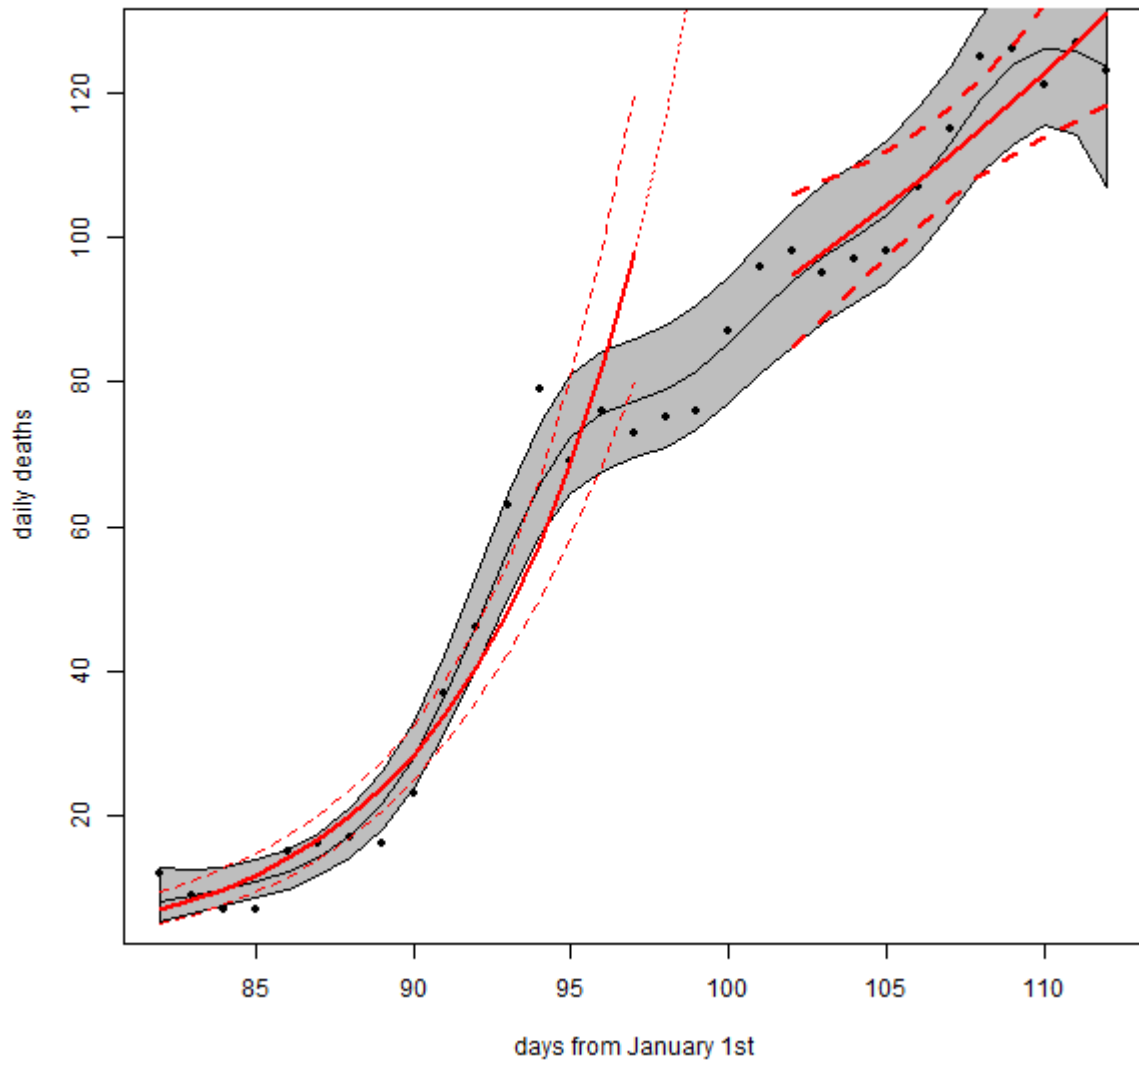

# UAE

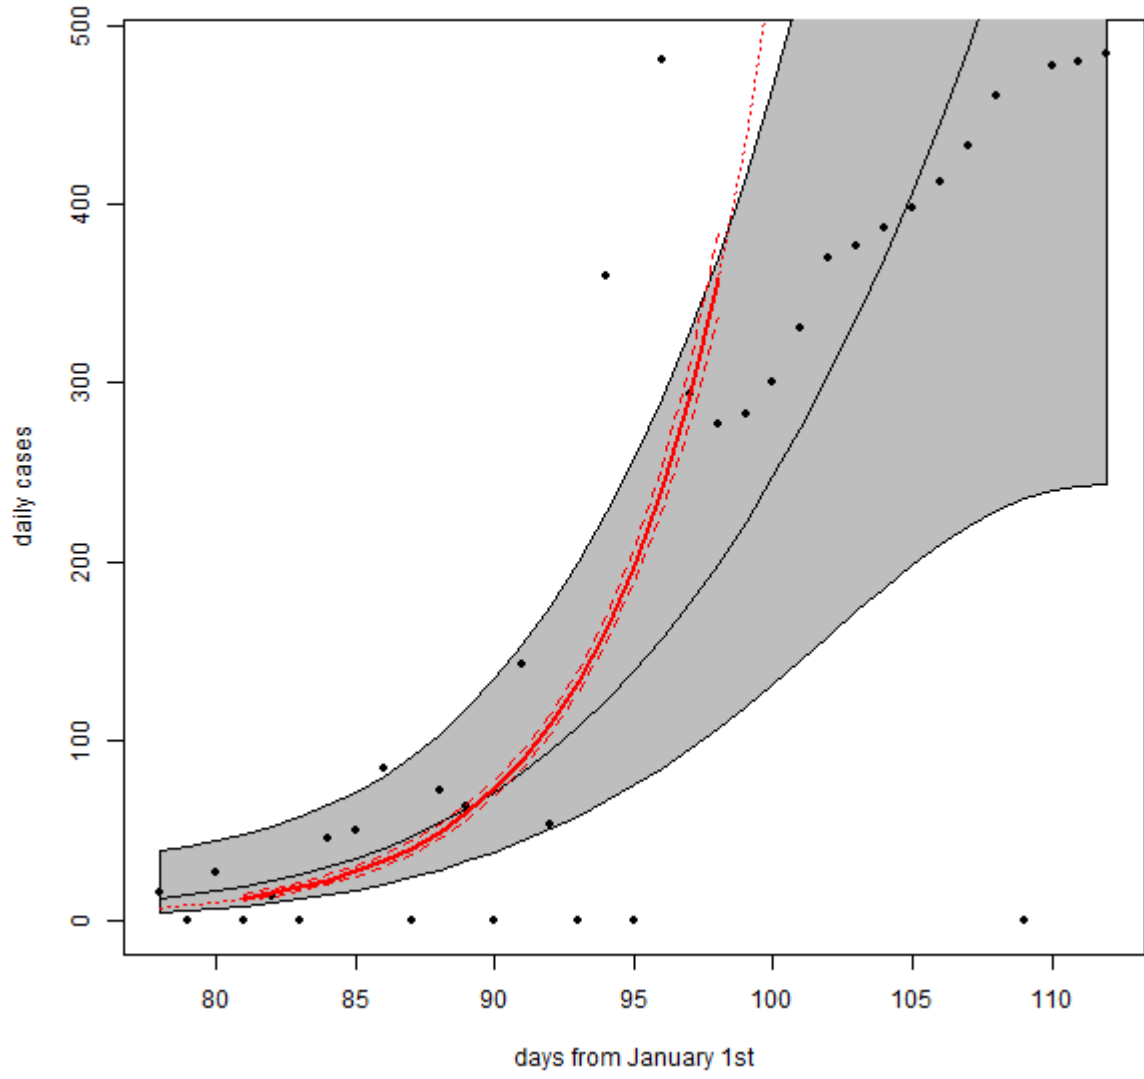

# UK

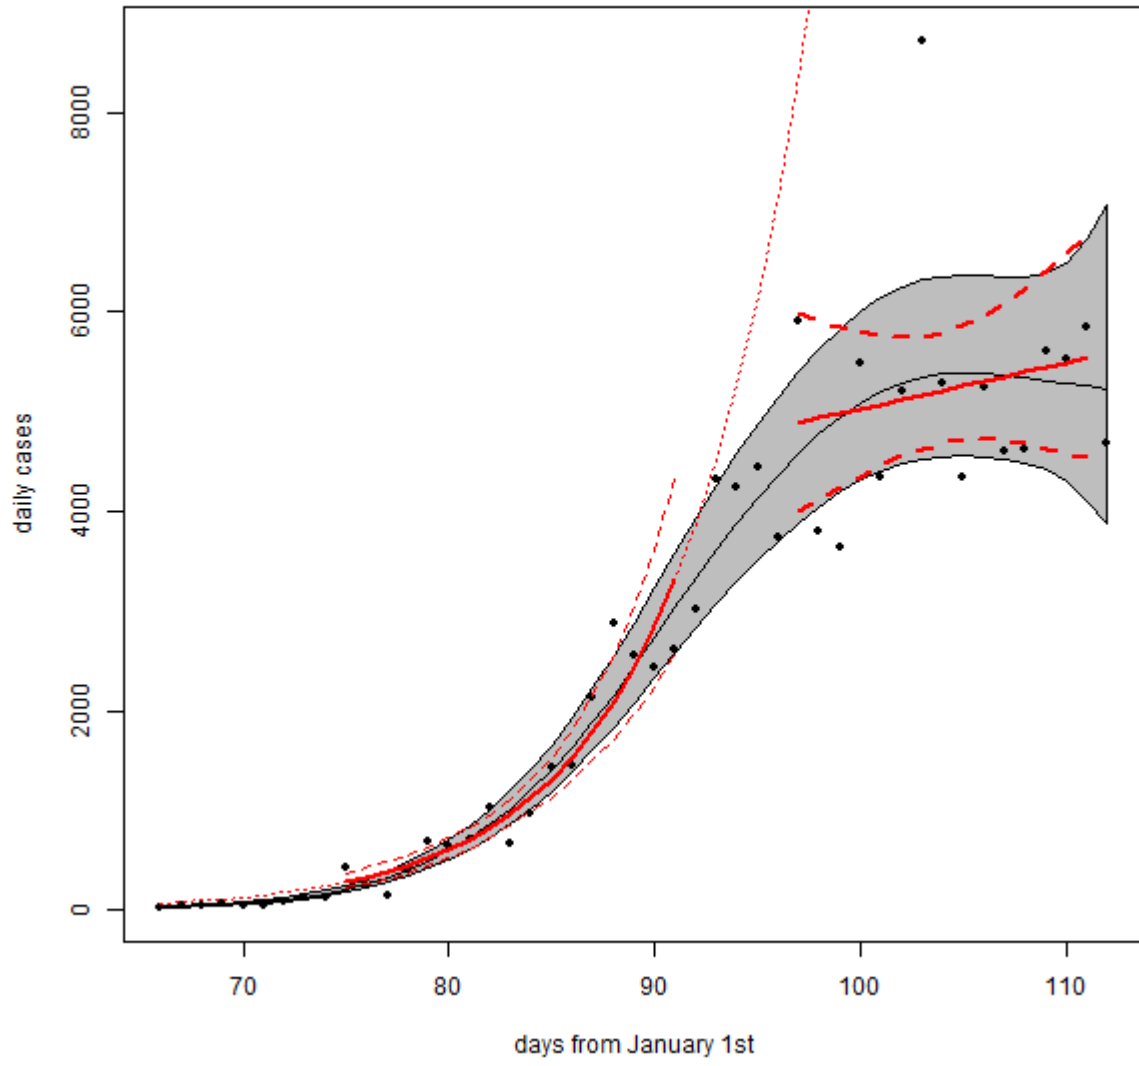



UK

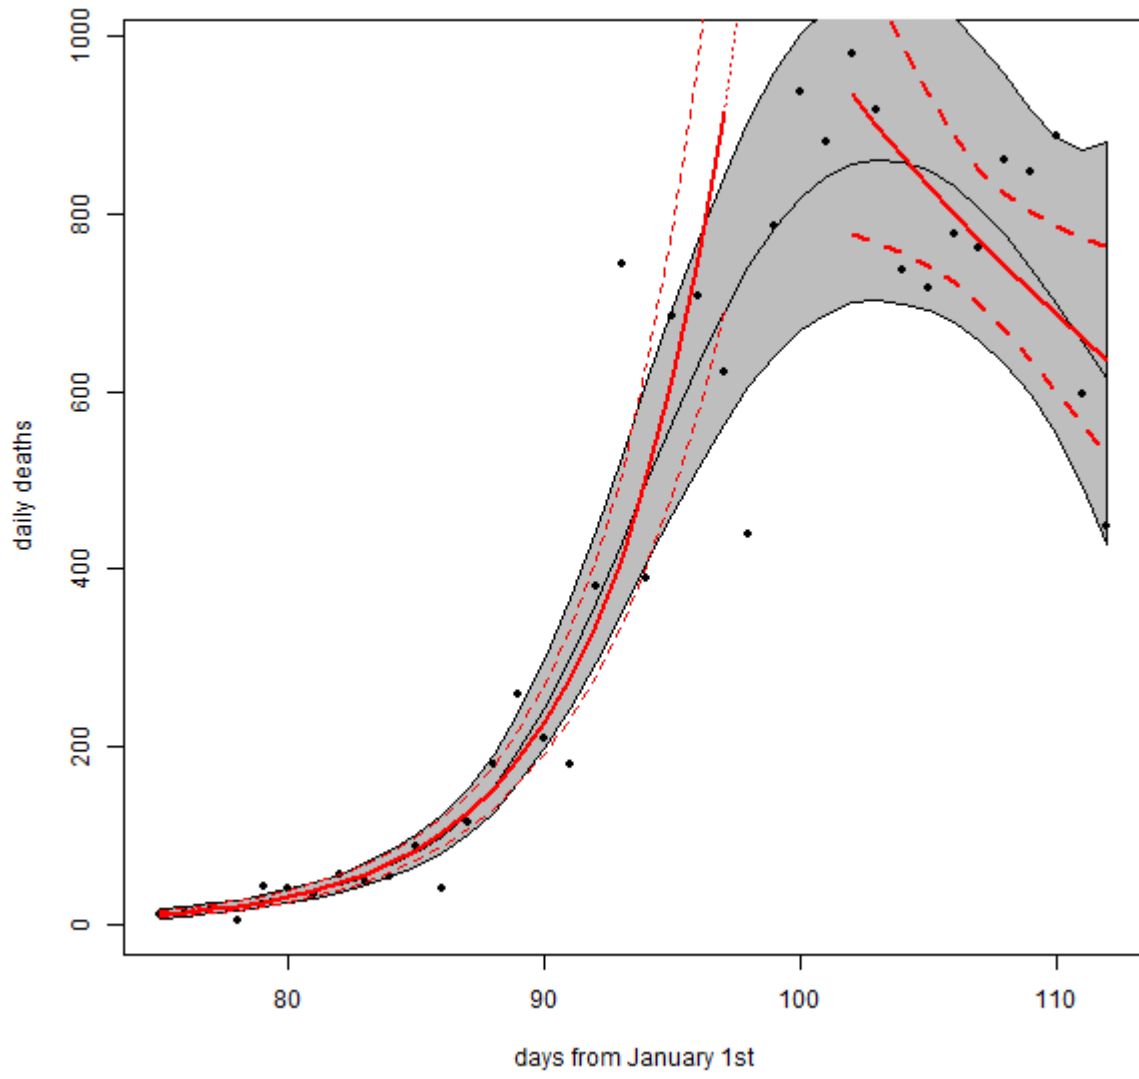

# Ukraine

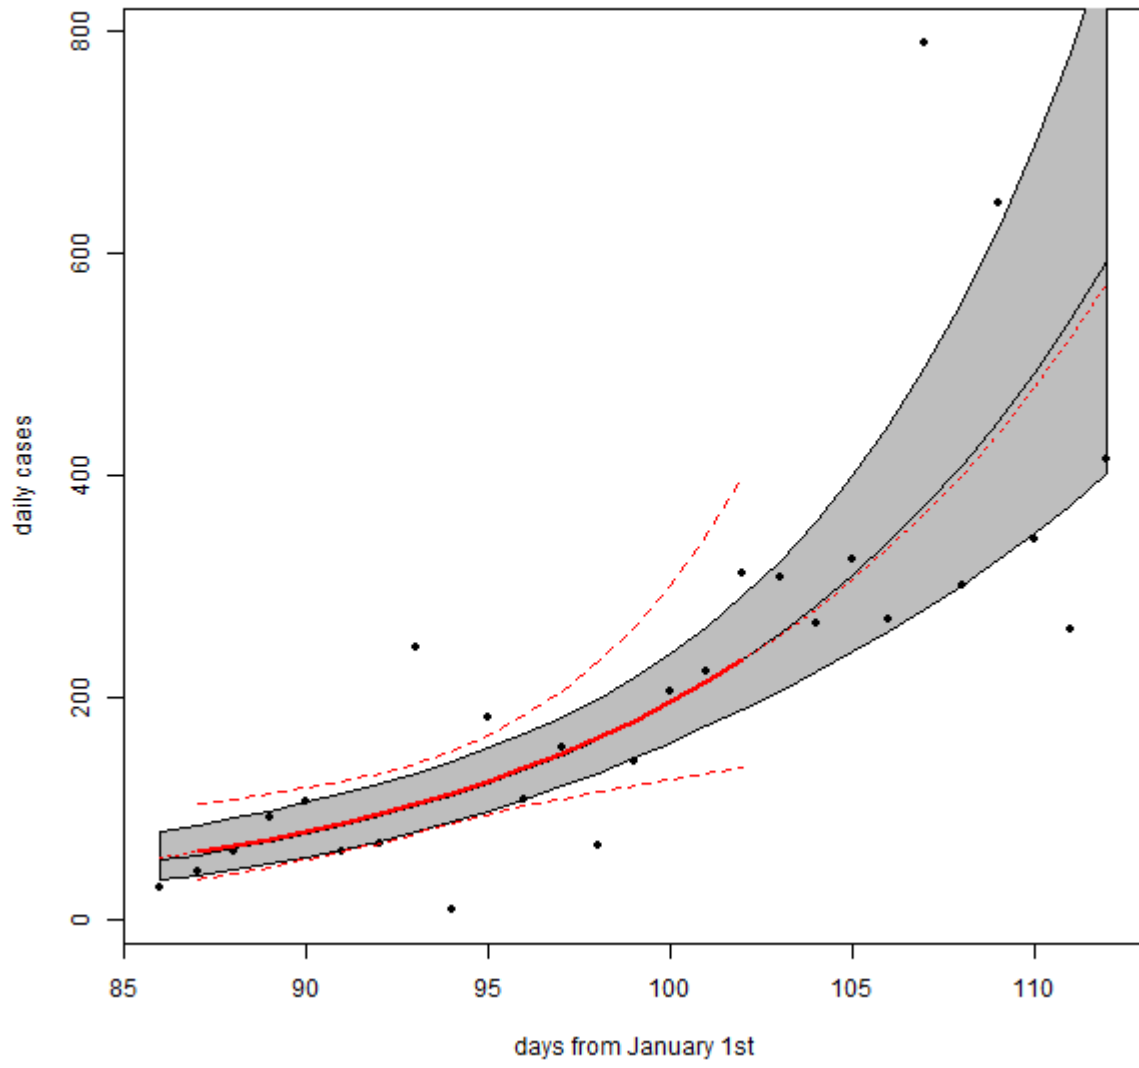

# Ukraine

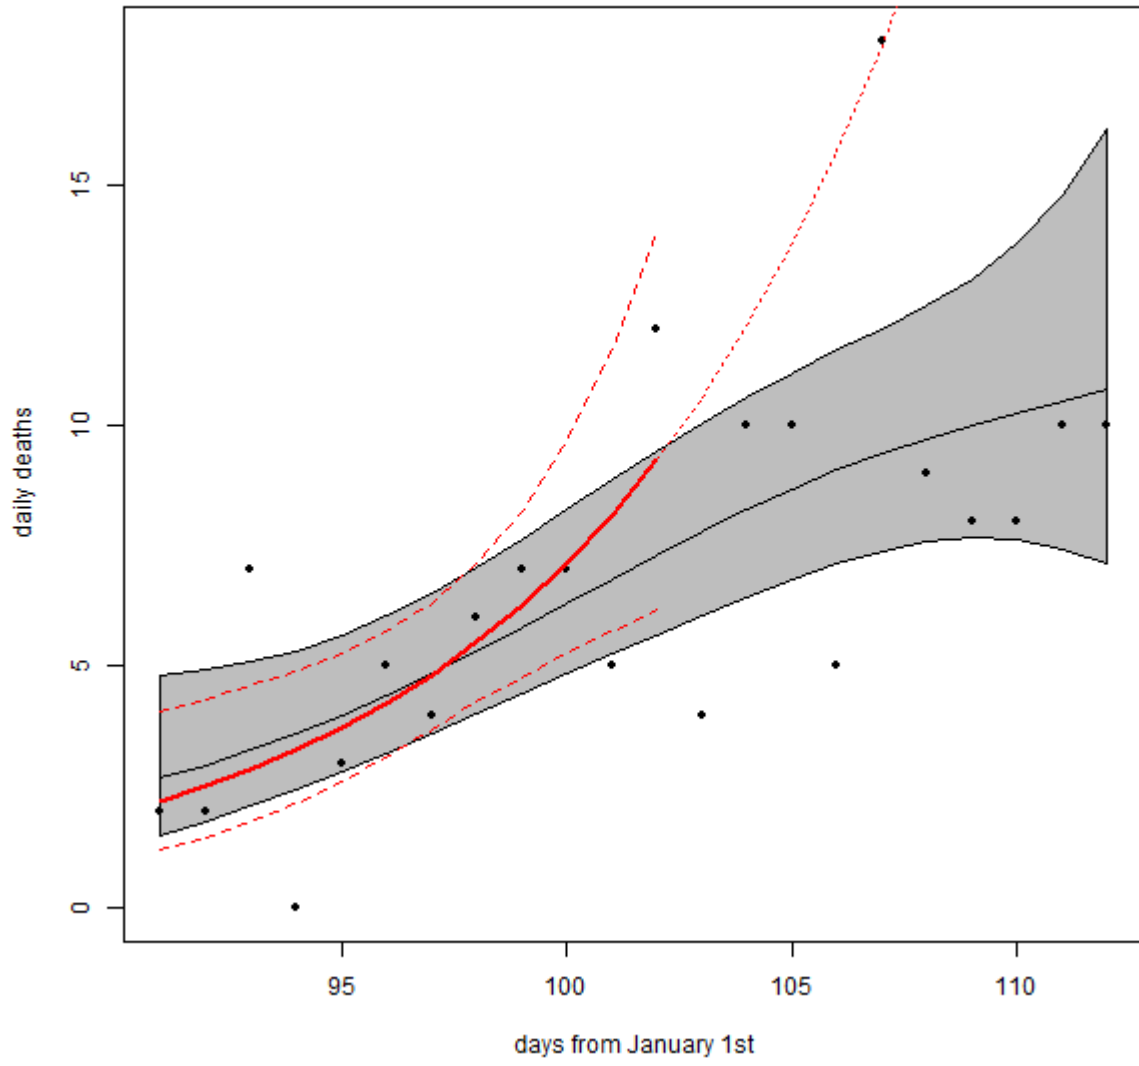

# USA

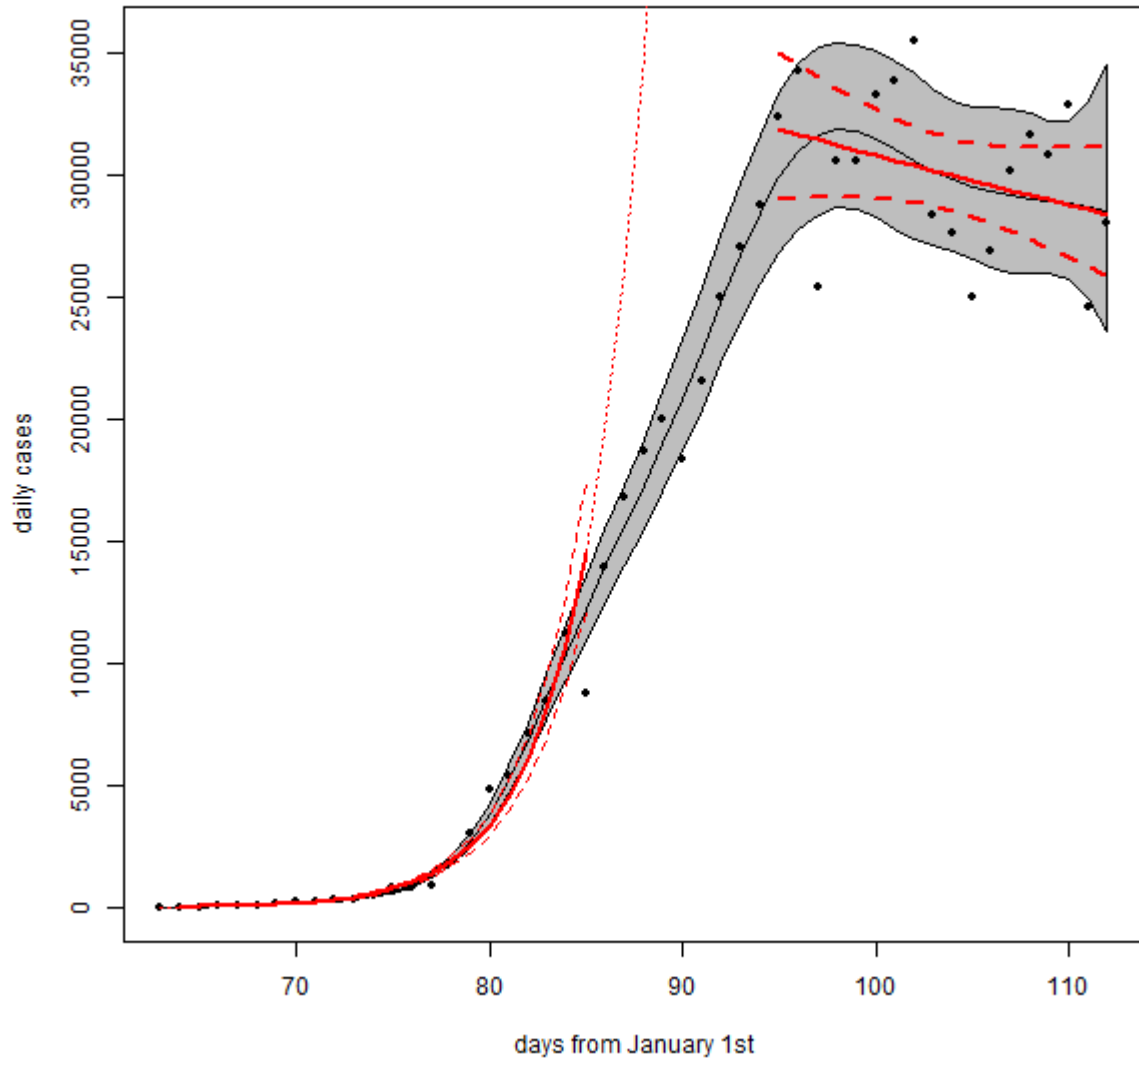

# USA

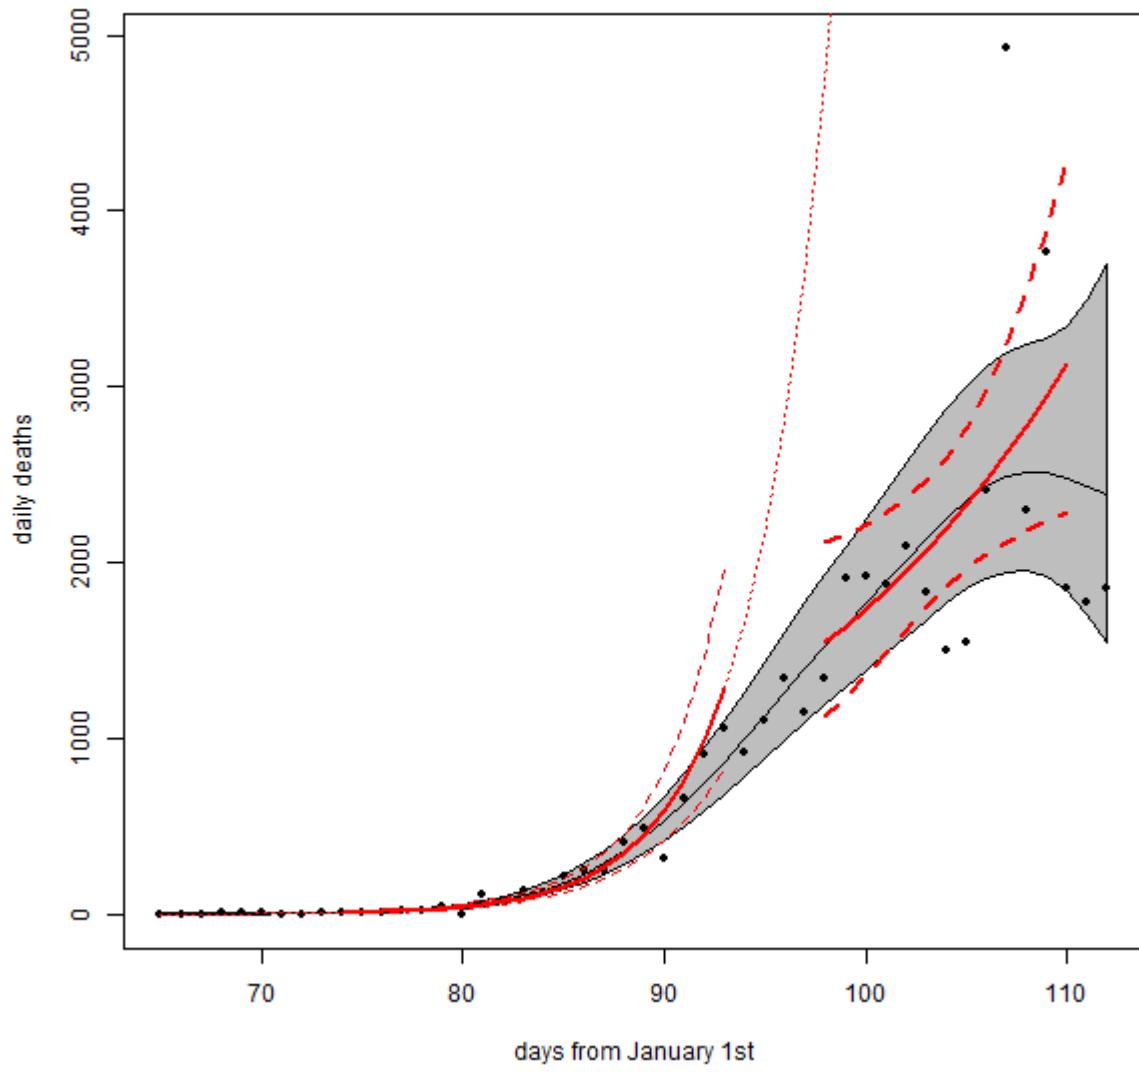

### 3) R code

```
# uses R0 library
# data from:
# https://www.ecdc.europa.eu/en/publications-data/download-todays-data-geographic-
distribution-covid-19-cases-worldwide

dat11<-read.csv("C:/mike/covid/COVID-19-geographic-disbtribution-worldwide.csv",as.is=TRUE)

# reverse so in order of increasing date
dat11<-dat11[nrow(dat11):1,]

# shorten country
names(dat11)<-ifelse(names(dat11)=="countriesAndTerritories","country",names(dat11))

# shorten some names
dat11$country[dat11$country=="United_States_of_America"]<-"USA"
dat11$country[dat11$country=="United_Kingdom"]<-"UK"
dat11$country[dat11$country=="Dominican_Republic"]<-"Dominican_Rep"
dat11$country[dat11$country=="United_Arab_Emirates"]<-"UAE"
dat11$country[dat11$country=="Bosnia_and_Herzegovina"]<-"Bosnia"
dat11$country[dat11$country=="North_Macedonia"]<-"N_Macedonia"

dat11$d2020<-dayssince1900(strptime2(dat11$dateRep))-120*365-28

# there is negative number for the last day of "Cases_on_an_international_conveyance_Japan"
dat11[is.na(dat11$d2020) | dat11$cases<0 | dat11$deaths<0,]
# just remove that line
dat11<-dat11[!is.na(dat11$d2020) & dat11$cases>=0 & !is.na(dat11$deaths) & dat11$deaths>=0,]

# and in Iran the data for the 4th April has been put on the 5th; share those out (it is an
odd number)
dat11[dat11$country=="Iran" & dat11$dateRep=="04/04/2020",c("cases","deaths")]<-
  floor(dat11[dat11$country=="Iran" & dat11$dateRep=="05/04/2020",c("cases","deaths")]/2)
dat11[dat11$country=="Iran" & dat11$dateRep=="05/04/2020",c("cases","deaths")]<-
  ceiling(dat11[dat11$country=="Iran" &
dat11$dateRep=="05/04/2020",c("cases","deaths")]/2)

# in China a huge pile got added on the 17/04/2020; discard that day
dat11<- dat11[dat11$country!="China" | dat11$dateRep!="17/04/2020",]

# add running totals for each country
dat11$cumdeaths<-0
dat11$cumcases<-0
for(ct in unique(dat11$country))
{
  dat11$cumcases[dat11$country==ct]<-cumsum(dat11$cases[dat11$country==ct])
  dat11$cumdeaths[dat11$country==ct]<-cumsum(dat11$deaths[dat11$country==ct])
}

# make table of slopes
slopetab<-data.frame(country=sort(unique(dat11$country)),cases=NA_real_,deaths=NA_real_)

for(i in 1:nrow(slopetab))
{ datc<-dat11[dat11$country==slopetab$country[i],]
  slopetab$cases[i]<-sum(datc$cases)
  slopetab$deaths[i]<-sum(datc$deaths)
}

slopetab<-slopetab[order(-slopetab$deaths),]

# quick squint at countries
slopetabc<-slopetab[order(-slopetab$cases),][1:16,]
par(mfrow=c(4,4))
for(i in 1:nrow(slopetabc))
{ if(!is.na(slopetabc$cases[i]) )
  {
    datc<-dat11[dat11$country==slopetabc$country[i],]

    plot(datc$d2020, datc$cases,pch=20,type="b",
          xlab="days from Jan 1st",
          ylab="cases",main=paste(slopetabc$country[i],sum(datc$cases)))
  }
}
```

```

    }
  }
  slopetabc

par(mfrow=c(4,4))
for(i in 1:16)
{ if(!is.na(slopetab$deaths[i])) )
  {
    datc<-dat11[dat11$country==slopetab$country[i],]

    plot(datc$d2020,
         datc$deaths,pch=20,type="b",
         xlab="days from Jan 1st",
         ylab="deaths",main=paste(slopetab$country[i],sum(datc$deaths)))
  }
}
slopetab[1:30,]

#####

# estimate exponential rates
# do for each possible start and end point that gives at least 5 datapoints
# don't include days before a total of 10 deaths/ 100 cases had been recorded
# only do for countries with 100 deaths, or 1000 cases, spread over at least 6 days
# neg binomial glms - use +-2se in 95%CI for simplicity

# store results in array: first two dimensions start and end times only fill above diagonal
# 3rd dimension: slope then slope se, then dAIC for quadratic, then dBIC for quadratic, then
theta
# mark date of peak with -1 in the diagonal of the theta layer so can use it to
# prevent overlapping of the first and second intervals

slopearray<-array(NA_real_,c(length(unique(dat11$d2020)),length(unique(dat11$d2020)),5))
sloplistd<-list()

library(MASS)
library(MuMIn)
library(mgcv)

# deaths
for(i in 1:sum(slopetab$deaths>100))
{
  sloplistd[[i]]<-slopearray
  names(sloplistd)[i]<-as.character(slopetab$country[slopetab$deaths>100][i])

  datc<-dat11[dat11$country==names(sloplistd)[i] & dat11$cumdeaths>10,]

  # date of peak
  d2020ofmax<-datc$d2020[which.max(datc$deaths)]
  sloplistd[[i]][d2020ofmax+1,d2020ofmax+1,5]<--1

  if(nrow(datc)>6)
  {
    for(j in min(datc$d2020):(max(datc$d2020)-4))
    { for(k in (j+4):max(datc$d2020))
      {
        g1<-try(glm.nb(deaths~d2020,data=datc[datc$d2020>=j & datc$d2020<=k,]),TRUE)
        g2<-try(glm.nb(deaths~d2020+I(d2020^2),data=datc[datc$d2020>=j &
datc$d2020<=k,]),TRUE)
        if("glm" %in% class(g1) && dim(summary(g1)$coef)[1]==2 )
        { sloplistd[[i]][j+1,k+1,1]<-g1$coef[2]
          sloplistd[[i]][j+1,k+1,2]<-summary(g1)$coef[2,2]
          if("glm" %in% class(g2))
          { sloplistd[[i]][j+1,k+1,3]<-AIC(g1)-AIC(g2)
            sloplistd[[i]][j+1,k+1,4]<-BIC(g1)-BIC(g2)
          }
          sloplistd[[i]][j+1,k+1,5]<-g1$theta
        } }
      } }
    } }
  print(paste(i,date()))
}

# cases

```

```

slopelistc<-list()
for(i in 1:sum(slopetab$cases>1000))
{
  slopelistc[[i]]<-slopearray
  names(slopelistc)[i]<-as.character(slopetab$country[slopetab$cases>1000][i])

  datc<-dat11[dat11$country==names(slopelistc)[i] & dat11$cumcases>100,]

  # date of peak
  d2020ofmax<-datc$d2020[which.max(datc$cases)]
  slopelistc[[i]][d2020ofmax+1,d2020ofmax+1,5]<--1

  if(nrow(datc)>6)
  {
    for(j in min(datc$d2020):(max(datc$d2020)-4))
    { for(k in (j+4):max(datc$d2020))
      {
        g1<-try(glm.nb(cases~d2020,data=datc[datc$d2020>=j & datc$d2020<=k,]),TRUE)
        g2<-try(glm.nb(cases~d2020+I(d2020^2),data=datc[datc$d2020>=j &
datc$d2020<=k,]),TRUE)
        if("glm" %in% class(g1) && dim(summary(g1)$coef)[1]==2 )
        { slopelistc[[i]][j+1,k+1,1]<-g1$coef[2]
          slopelistc[[i]][j+1,k+1,2]<-summary(g1)$coef[2,2]
          if("glm" %in% class(g2))
          { slopelistc[[i]][j+1,k+1,3]<-AIC(g1)-AIC(g2)
            slopelistc[[i]][j+1,k+1,4]<-BIC(g1)-BIC(g2)
          }
          slopelistc[[i]][j+1,k+1,5]<-g1$theta
        } }
      } }
    print(paste(i,date()))
  }
}

# function to find which one has positive slope
# and which subsequent one has lower slope
# where BIC for linear "most better" than BIC quadratic

minse<-function(sa,daic=0,gap=5,minl=10,bp=5)
{
  # output a matrix of start and end positions with biggest BIC difference
  # first row positive slope, second row negative
  res<-matrix(NA_real_,2,2)

  # find date of peak
  dpeak<-which(sa[,5]==-1,TRUE)[1]

  # filter if less than minl days long
  for(i in 1:(dim(sa)[1]))
    sa[i,i:min(i+minl-1,dim(sa)[1]),]<-NA_real_

  # filter for bic daic better for linear
  sa[,1]<-ifelse(sa[,4]<daic,sa[,1],NA_real_)
  sa[,4]<-ifelse(sa[,4]<daic,sa[,4],NA_real_)

  # positives
  sap<-sa
  sap[,4]<-ifelse(sa[,1]>0,sa[,4],NA_real_)
  # filter out any that end after bp days before date of peak
  sap[,-(1:(dpeak-bp)),]<-NA_real_

  #best bic difference
  if(mean(is.na(sap[,4]))<1)
    res[1,]<-which(sap[,4]==min(sap[,4],na.rm=TRUE),TRUE)[1,]

  # was negative, now just require smaller slope for second group - TAKEN THIS OUT
  # sa[,4]<-ifelse(sa[,1]<sa[res[1,1],res[1,2],1],sa[,4],NA_real_)
  # filter out any that start less than gap after the end of the first exponential growth
  if(!is.na(res[1,2]))
    sa[1:min((res[1,2]-1+gap),dim(sa)[1]),]<-NA_real_

  if(mean(is.na(sa[,4]))<1)

```



```

    {   second<-which(sa[, ,4]==min(sa[, ,4],na.rm=TRUE),TRUE)
        res[2,]<-second[nrow(second),]
    }
}
return(res)
}

minse(slopetab[[2]],0)

#####

# fill table of slopes

slopetab$dbfirstday<-NA_real_
slopetab$dblastday<-NA_real_
slopetab$dbslope<-NA_real_
slopetab$dbse<-NA_real_
slopetab$dafirstday<-NA_real_
slopetab$dalastday<-NA_real_
slopetab$daslope<-NA_real_
slopetab$dase<-NA_real_
slopetab$cbfirstday<-NA_real_
slopetab$cblastday<-NA_real_
slopetab$cbslope<-NA_real_
slopetab$cbse<-NA_real_
slopetab$cafirstday<-NA_real_
slopetab$calastday<-NA_real_
slopetab$caslope<-NA_real_
slopetab$case<-NA_real_

for(i in 1:nrow(slopetab))
{
  if(slopetab[i,1] %in% names(slopetab))
  {
    eval(parse(text=paste("theseslopes<-slopetab$",slopetab[i,1],sep="")))
    thesebounds<-minse(theseslopes,0)
    slopetab$dbfirstday[i]<-thesebounds[1,1]-1 # need to subtract 1 to get back to d2020
    slopetab$dblastday[i]<-thesebounds[1,2]-1
    slopetab$dafirstday[i]<-thesebounds[2,1]-1
    slopetab$dalastday[i]<-thesebounds[2,2]-1
    slopetab$dbslope[i]<-theseslopes[thesebounds[1,1],thesebounds[1,2],1]
    slopetab$dbse[i]<-theseslopes[thesebounds[1,1],thesebounds[1,2],2]
    slopetab$daslope[i]<-theseslopes[thesebounds[2,1],thesebounds[2,2],1]
    slopetab$dase[i]<-theseslopes[thesebounds[2,1],thesebounds[2,2],2]
  }
  if(slopetab[i,1] %in% names(slopetab))
  {
    eval(parse(text=paste("theseslopes<-slopetab$",slopetab[i,1],sep="")))
    thesebounds<-minse(theseslopes,0)
    slopetab$cbfirstday[i]<-thesebounds[1,1]-1
    slopetab$cblastday[i]<-thesebounds[1,2]-1
    slopetab$cafirstday[i]<-thesebounds[2,1]-1
    slopetab$calastday[i]<-thesebounds[2,2]-1
    slopetab$cbslope[i]<-theseslopes[thesebounds[1,1],thesebounds[1,2],1]
    slopetab$cbse[i]<-theseslopes[thesebounds[1,1],thesebounds[1,2],2]
    slopetab$caslope[i]<-theseslopes[thesebounds[2,1],thesebounds[2,2],1]
    slopetab$case[i]<-theseslopes[thesebounds[2,1],thesebounds[2,2],2]
  }
}

# discard those with no initial exponential models
slopetab<-slopetab[!is.na(slopetab$dbfirstday) | !is.na(slopetab$cbfirstday),]

# doubling times : also need version that just does halving

slopetab$dbdbl<-log(2)/slopetab$dbslope
slopetab$dbdbl<e1<-log(2)/(slopetab$dbslope+2*slopetab$dbse)
slopetab$dbdbl<e2<-log(2)/(slopetab$dbslope-2*slopetab$dbse)

slopetab$dadb<-log(2)/abs(slopetab$daslope)
slopetab$dadb<e1<-log(2)/(abs(slopetab$daslope)+2*slopetab$dase)
slopetab$dadb<e2<-log(2)/(abs(slopetab$daslope)-2*slopetab$dase)

# using 1000000 for Inf to ease plotting
slopetab$dahalve<-ifelse(slopetab$daslope<0,slopetab$dadb<e1,NA_real_)

```

```

slopetab$dahalve1<-slopetab$dadble1
slopetab$dahalveu<-ifelse((slopetab$daslope+2*slopetab$dase)<0,slopetab$dadbleu,1000000)

slopetab$cbdb1e<-log(2)/slopetab$cbslope
slopetab$cbdb1e1<-log(2)/(slopetab$cbslope+2*slopetab$cbse)
slopetab$cbdb1eu<-log(2)/(slopetab$cbslope-2*slopetab$cbse)

slopetab$cadble<-log(2)/abs(slopetab$caslope)
slopetab$cadble1<-log(2)/(abs(slopetab$caslope)+2*slopetab$case)
slopetab$cadbleu<-log(2)/(abs(slopetab$caslope)-2*slopetab$case)

slopetab$cahalve<-ifelse(slopetab$caslope<0,slopetab$cadble,NA_real_)
slopetab$cahalve1<-slopetab$cadble1
slopetab$cahalveu<-ifelse((slopetab$caslope+2*slopetab$case)<0,slopetab$cadbleu,1000000)

# r0

library(R0)

# Nishiura et al 2020: lognormal mean 4.7 sd 2.9
mGT <- generation.time("lognormal", c(4.7,2.9))

# because these are only a sample of the people, R0 doesn't like working directly off them
# so go via the slope estimates

slopetab$dbr0<-NA_real_
slopetab$dbr01<-NA_real_
slopetab$dbr0u<-NA_real_
slopetab$dar0<-NA_real_
slopetab$dar01<-NA_real_
slopetab$dar0u<-NA_real_

slopetab$cbr0<-NA_real_
slopetab$cbr01<-NA_real_
slopetab$cbr0u<-NA_real_
slopetab$car0<-NA_real_
slopetab$car01<-NA_real_
slopetab$car0u<-NA_real_

for(i in 1:nrow(slopetab))
{
  if(!is.na(slopetab$dblastday[i]))
  { slopetab$dbr0[i]<- try(R0::R.from.r(slopetab$dbslope[i],GT=mGT),TRUE)
    slopetab$dbr01[i]<- try(R0::R.from.r(slopetab$dbslope[i]-
2*slopetab$dbse[i],GT=mGT),TRUE)
    slopetab$dbr0u[i]<-
try(R0::R.from.r(slopetab$dbslope[i]+2*slopetab$dbse[i],GT=mGT),TRUE)
  }

  if(!is.na(slopetab$dalastday[i]))
  { slopetab$dar0[i]<- try(R0::R.from.r(slopetab$daslope[i],GT=mGT),TRUE)
    slopetab$dar01[i]<- try(R0::R.from.r(slopetab$daslope[i]-
2*slopetab$dase[i],GT=mGT),TRUE)
    slopetab$dar0u[i]<-
try(R0::R.from.r(slopetab$daslope[i]+2*slopetab$dase[i],GT=mGT),TRUE)
  }

  if(!is.na(slopetab$cb1astday[i]))
  { slopetab$cbr0[i]<- try(R0::R.from.r(slopetab$cbslope[i],GT=mGT),TRUE)
    slopetab$cbr01[i]<- try(R0::R.from.r(slopetab$cbslope[i]-
2*slopetab$cbse[i],GT=mGT),TRUE)
    slopetab$cbr0u[i]<-
try(R0::R.from.r(slopetab$cbslope[i]+2*slopetab$cbse[i],GT=mGT),TRUE)
  }

  if(!is.na(slopetab$calastday[i]))
  { slopetab$car0[i]<- try(R0::R.from.r(slopetab$caslope[i],GT=mGT),TRUE)
    slopetab$car01[i]<- try(R0::R.from.r(slopetab$caslope[i]-
2*slopetab$case[i],GT=mGT),TRUE)
    slopetab$car0u[i]<-
try(R0::R.from.r(slopetab$caslope[i]+2*slopetab$case[i],GT=mGT),TRUE)
  }
}

```

```

}

# ratio of slopes; before over after

slopetab$dsloperat<--slopetab$dbslope/slopetab$daslope
slopetab$dsloperat1<-NA_real_
slopetab$dsloperatu<-NA_real_

slopetab$csloperat<--slopetab$cbslope/slopetab$caslope
slopetab$csloperat1<-NA_real_
slopetab$csloperatu<-NA_real_

for(i in 1:nrow(slopetab))
{ rats<-rnorm(10000,slopetab$dbslope[i],slopetab$dbse[i])/
  rnorm(10000,-slopetab$daslope[i],slopetab$dase[i])
  if(sum(is.na(rats))==0)
  { slopetab$dsloperat1[i]<-quantile(rats,0.025)
    slopetab$dsloperatu[i]<-quantile(rats,0.975)
  }

  rats<-rnorm(10000,slopetab$cbslope[i],slopetab$cbse[i])/
  rnorm(10000,-slopetab$caslope[i],slopetab$case[i])
  if(sum(is.na(rats))==0)
  { slopetab$csloperat1[i]<-quantile(rats,0.025)
    slopetab$csloperatu[i]<-quantile(rats,0.975)
  }
}

# and proportion of time off lockdown: -after/(before+-after)

slopetab$dpropunlock<-NA_real_
slopetab$dpropunlock1<-NA_real_
slopetab$dpropunlocku<-NA_real_

slopetab$cpropunlock<-NA_real_
slopetab$cpropunlock1<-NA_real_
slopetab$cpropunlocku<-NA_real_

for(i in 1:nrow(slopetab))
{ before<-rnorm(10000,slopetab$dbslope[i],slopetab$dbse[i])
  after<-rnorm(10000,slopetab$daslope[i],slopetab$dase[i])
  rats<-ifelse(after>0,0,ifelse(before<=0,1,-after/(before-after)))
  if(sum(is.na(rats))==0)
  { slopetab$dpropunlock1[i]<-quantile(rats,0.025)
    slopetab$dpropunlock[i]<-quantile(rats,0.5)
    slopetab$dpropunlocku[i]<-quantile(rats,0.975)
  }

  before<-rnorm(10000,slopetab$cbslope[i],slopetab$cbse[i])
  after<-rnorm(10000,slopetab$caslope[i],slopetab$case[i])
  rats<-ifelse(after>0,0,ifelse(before<=0,1,-after/(before-after)))
  if(sum(is.na(rats))==0)
  { slopetab$cpropunlock1[i]<-quantile(rats,0.025)
    slopetab$cpropunlock[i]<-quantile(rats,0.5)
    slopetab$cpropunlocku[i]<-quantile(rats,0.975)
  }
}

# proportion reclaimable of forgone

slopetab$dprf<-NA_real_
slopetab$dprf1<-NA_real_
slopetab$dprfu<-NA_real_

slopetab$cprf<-NA_real_
slopetab$cprf1<-NA_real_
slopetab$cprfu<-NA_real_

for(i in 1:nrow(slopetab))
{ bit<-pmax(0,rnorm(10000,slopetab$dbr0[i],(slopetab$dbr0u[i]-slopetab$dbr01[i])/4))

```

```

ait<-pmax(0,rnorm(10000,slopetab$dar0[i],(slopetab$dar0u[i]-slopetab$dar0l[i])/4))
rats<-ifelse(ait>=pmin(1,bit),0,(1-ait)/(bit-ait))
if(sum(is.na(rats))==0)
{ slopetab$dprfl[i]<-quantile(rats,0.025)
  slopetab$dprf[i]<-quantile(rats,0.5)
  slopetab$dprfu[i]<-quantile(rats,0.975)
}

bit<-pmax(0,rnorm(10000,slopetab$cbr0[i],(slopetab$cbr0u[i]-slopetab$cbr0l[i])/4))
ait<-pmax(0,rnorm(10000,slopetab$car0[i],(slopetab$car0u[i]-slopetab$car0l[i])/4))
rats<-ifelse(ait>=pmin(1,bit),0,(1-ait)/(bit-ait))
if(sum(is.na(rats))==0)
{ slopetab$cprfl[i]<-quantile(rats,0.025)
  slopetab$cprf[i]<-quantile(rats,0.5)
  slopetab$cprfu[i]<-quantile(rats,0.975)
}
}

# function for country plot
trajplot<-function(ctry="Italy",response="deaths",dat=dat11,slopetable=slopetab)
{
  datc<-dat11[dat11$country==ctry,]
  if(response=="deaths")
  { datc$resp<-datc$deaths
    firstnlast<-as.numeric(slopetable[slopetable$country==ctry,
      c("dbfirstday","dblastday","dafirstday","dalastday")])
    datc<-datc[cumsum(datc$resp)>10,]
  } else
  { datc$resp<-datc$cases
    firstnlast<-as.numeric(slopetable[slopetable$country==ctry,
      c("cbfirstday","cblastday","cafirstday","calastday")])
    datc<-datc[cumsum(datc$resp)>100,]
  }

  require(mgcv)
  gam1<-gam(resp~s(d2020),data=datc,family=nb())
  pgam1<-predict(gam1,se=TRUE)

  plot(datc$d2020,datc$resp,pch=20,
        xlab="days from January 1st",ylab=paste("daily",response),main=ctry)
  polygon(c(datc$d2020, rev(datc$d2020)),
          c(exp(pgam1$fit+2*pgam1$se.fit), rev(exp(pgam1$fit-2*pgam1$se.fit))), col="grey")

  lines(datc$d2020,fitted(gam1))
  points(datc$d2020, datc$resp,pch=20)

  if(!is.na(firstnlast[2]))
  { gb<-glm.nb(resp~d2020,data=datc[datc$d2020>=firstnlast[1] & datc$d2020<=firstnlast[2],])
    pgb<-predict(gb,se=TRUE)

    lines(min(datc$d2020):max(datc$d2020),

predict(gb,data.frame(d2020=min(datc$d2020):max(datc$d2020)),type="response"),col=2,lty="dotted")
    lines(datc$d2020[datc$d2020>=firstnlast[1] & datc$d2020<=firstnlast[2]],
          fitted(gb),col=2,lwd=2)
    lines(datc$d2020[datc$d2020>=firstnlast[1] & datc$d2020<=firstnlast[2]],
          exp(pgb$fit+2*pgb$se.fit),col=2,lty="dashed")
    lines(datc$d2020[datc$d2020>=firstnlast[1] & datc$d2020<=firstnlast[2]],
          exp(pgb$fit-2*pgb$se.fit),col=2,lty="dashed")
  }

  if(!is.na(firstnlast[4]))
  { ga<-glm.nb(resp~d2020,data=datc[datc$d2020>=firstnlast[3] & datc$d2020<=firstnlast[4],])
    pga<-predict(ga,se=TRUE)

    lines(datc$d2020[datc$d2020>=firstnlast[3] & datc$d2020<=firstnlast[4]],
          fitted(ga),col=2,lwd=2)
    lines(datc$d2020[datc$d2020>=firstnlast[3] & datc$d2020<=firstnlast[4]],
          exp(pga$fit+2*pga$se.fit),col=2,lty="dashed",lwd=2)
    lines(datc$d2020[datc$d2020>=firstnlast[3] & datc$d2020<=firstnlast[4]],
          exp(pga$fit-2*pga$se.fit),col=2,lty="dashed",lwd=2)
  }
}

```

```

}

#####

# list of problematic situations
badcases<-c("Bosnia", "China", "Egypt", "Iran", "Malaysia")
baddeaths<-c("Iran")
#####

# plots

# fig 1 example trajectories

tiff("C:/mike/covid/ms figs5/fig1.tif",
     width = 800, height = 800, units = "px")#, compression = "lzw")
par(mfrow=c(5,2))
par(mar=c(2, 4, 2, 1) + 0.1)
trajplot("USA","cases")
trajplot("USA")
trajplot("Italy","cases")
trajplot()
trajplot("Spain","cases")
trajplot("Spain")
trajplot("France","cases")
trajplot("France")
trajplot("UK","cases")
trajplot("UK")
dev.off()

# fig 2: doubling time before and after, and R before and after
# make negatives in ahalve1 and bdb1eu large for plotting

tiff("C:/mike/covid/ms figs5/fig2.tif",
     width = 800, height = 800, units = "px")#, compression = "lzw")
slopetabt<-slopetab[order(slopetab[,1]),][nrow(slopetab):1,]

par(mfrow=c(1,4))
par(mar=c(5, 6, 4, 2) + 0.1)

plot(slopetabt$dbdb1e ,1:nrow(slopetabt),xlim=c(0,12),ylim=c(0,nrow(slopetabt)+1),yaxs="i",yaxt="n",ylab="",
     xlab="A) doubling time (days)",xaxs="i",
     pch=ifelse(slopetabt$country %in% baddeaths,21,19))

axis(2,1:nrow(slopetabt), slopetabt$country ,las=2)

segments(slopetabt$dbdb1e1 ,1:nrow(slopetabt),ifelse(slopetabt$dbdb1eu >=0,slopetabt$dbdb1eu
,100000),1:nrow(slopetabt),
        lwd=ifelse(slopetabt$country %in% baddeaths,1,2))

points(slopetabt$cbdb1e ,1:nrow(slopetabt)+0.2,col=2,
       pch=ifelse(slopetabt$country %in% badcases,21,19))

segments(slopetabt$cbdb1e1 ,1:nrow(slopetabt)+0.2,
        ifelse(slopetabt$cbdb1eu >=0,slopetabt$cbdb1eu ,100000),1:nrow(slopetabt)+0.2,col=2,
        lwd=ifelse(slopetabt$country %in% badcases,1,2))

abline(v=7,lty="dotted")

plot(slopetabt$daha1ve ,1:nrow(slopetabt),ylim=c(0,nrow(slopetabt)+1),yaxs="i",yaxt="n",ylab="",
     xlab="B) halving time (days)",xlim=c(0,60),xaxs="i",
     pch=ifelse(slopetabt$country %in% baddeaths,21,19))

axis(2,1:nrow(slopetabt), slopetabt$country ,las=2)

segments(slopetabt$daha1ve1 ,
        1:nrow(slopetabt),slopetabt$daha1veu ,1:nrow(slopetabt),
        lwd=ifelse(slopetabt$country %in% baddeaths,1,2))

```

```

points(slopetabt$cahalve ,1:nrow(slopetabt)+0.2,col=2,
      pch=ifelse(slopetabt$country %in% badcases,21,19))

segments(slopetabt$cahalve1 ,1:nrow(slopetabt)+0.2,
        slopetabt$cahalveu ,1:nrow(slopetabt)+0.2,col=2,
        lwd=ifelse(slopetabt$country %in% badcases,1,2))

abline(v=7,lty="dotted")

plot(exp(4*(slopetabt$dbslope )),1:nrow(slopetabt),ylim=c(0,nrow(slopetabt)+1),yaxs="i",yaxt="n",ylab="",
      xlab="C) R0 before lockdown",xlim=c(0,4.2),xaxs="i",
      pch=ifelse(slopetabt$country %in% baddeaths,21,19))

axis(2,1:nrow(slopetabt), slopetabt$country ,las=2)

segments(exp(4*(slopetabt$dbslope -2*slopetabt$dbse )),1:nrow(slopetabt),
        exp(4*(slopetabt$dbslope +2*slopetabt$dbse )),1:nrow(slopetabt),
        lwd=ifelse(slopetabt$country %in% baddeaths,1,2))

points(exp(4*(slopetabt$cbslope )),1:nrow(slopetabt)+0.2,col=2,
      pch=ifelse(slopetabt$country %in% badcases,21,19))

segments(exp(4*(slopetabt$cbslope -2*slopetabt$cbse )),1:nrow(slopetabt)+0.2,
        exp(4*(slopetabt$cbslope +2*slopetabt$cbse )),1:nrow(slopetabt)+0.2,col=2,
        lwd=ifelse(slopetabt$country %in% badcases,1,2))

abline(v=1,lty="dotted")

plot(exp(4*(slopetabt$daslope )),1:nrow(slopetabt),
      ylim=c(0,nrow(slopetabt)+1),yaxs="i",yaxt="n",ylab="",
      xlab="D) R0 under lockdown",xlim=c(0,2),xaxs="i",
      pch=ifelse(slopetabt$country %in% baddeaths,21,19))

axis(2,1:nrow(slopetabt), slopetabt$country ,las=2)

segments(exp(4*(slopetabt$daslope -2*slopetabt$dase )),1:nrow(slopetabt),
        exp(4*(slopetabt$daslope +2*slopetabt$dase )),1:nrow(slopetabt),
        lwd=ifelse(slopetabt$country %in% baddeaths,1,2))

points(exp(4*(slopetabt$caslope )),1:nrow(slopetabt)+0.2,col=2,
      pch=ifelse(slopetabt$country %in% badcases,21,19))

segments(exp(4*(slopetabt$caslope -2*slopetabt$case )),1:nrow(slopetabt)+0.2,
        exp(4*(slopetabt$caslope +2*slopetabt$case )),1:nrow(slopetabt)+0.2,col=2,
        lwd=ifelse(slopetabt$country %in% badcases,1,2))

abline(v=1,lty="dotted")

dev.off()

# fig 3: proportion of time off lockdown
# main figure is those that are informative
# all goes in supplement

for(i in 1:2)
{
  slopetabt<-slopetab[order(slopetab[,1]),][nrow(slopetab):1,]

  if(i==1)
  { tiff("C:/mike/covid/ms figs5/fig3.tif", width = 800, height = 800, units = "px")#,
    compression = "lzw")

    # only show lines that don't go 0 to 1
    slopetabt$dpropunlock[slopetabt$dpropunlocku-slopetabt$dpropunlockl>=1]<-NA_real_
    slopetabt$dpropunlockl[is.na(slopetabt$dpropunlock)]<-NA_real_
    slopetabt$dpropunlocku[is.na(slopetabt$dpropunlock)]<-NA_real_
    slopetabt$cpropunlock[slopetabt$cpropunlocku-slopetabt$cpropunlockl>=1]<-NA_real_
    slopetabt$cpropunlockl[is.na(slopetabt$cpropunlock)]<-NA_real_
    slopetabt$cpropunlocku[is.na(slopetabt$cpropunlock)]<-NA_real_
    slopetabt<-slopetab[!is.na(slopetabt$dpropunlock) | !is.na(slopetabt$cpropunlock),]
  }
}

```

```

    } else
    { tiff("c:/mike/covid/ms figs5/fig3 all.tif", width = 400, height = 1600, units = "px")#,
      compression = "lzw")
    }

    par(mar=c(5, 7, 4, 2) + 0.1)
    par(mfrow=c(1,1))

plot(slopetabt$dpropunlock ,1:nrow(slopetabt),ylim=c(0,nrow(slopetabt)+1),yaxs="i",yaxt="n",y
lab="",xaxs="i",
      xlab="proportion of time off lockdown without epidemic resurgence",xlim=c(0,1),
      pch=ifelse(slopetabt$country %in% baddeaths,21,19))

axis(2,1:nrow(slopetabt), slopetabt$country ,las=2)

segments(slopetabt$dpropunlockl ,1:nrow(slopetabt),slopetabt$dpropunlocku ,1:nrow(slopetabt),
          lwd=ifelse(slopetabt$country %in% baddeaths,1,2))

points(slopetabt$cpropunlock ,1:nrow(slopetabt)+0.2,col=2,
        pch=ifelse(slopetabt$country %in% badcases,21,19))

segments(slopetabt$cpropunlockl ,1:nrow(slopetabt)+0.2,
          slopetabt$cpropunlocku ,1:nrow(slopetabt)+0.2,col=2,
          lwd=ifelse(slopetabt$country %in% badcases,1,2))

abline(v=7*12/365,lty="dotted")

dev.off()
}

# fig 4: proportion of forgone that can be reclaimed
# main figure is those that are informative
# all goes in supplement

for(i in 1:2)
{
  slopetabt<-slopetab[order(slopetab[,1]),][nrow(slopetab):1,]

  if(i==1)
  { tiff("c:/mike/covid/ms figs5/fig4.tif", width = 800, height = 800, units = "px")#,
    compression = "lzw")
    slopetabt<-slopetabt[(!is.na(slopetabt$dprf) & slopetabt$dprfu<1) |
                        (!is.na(slopetabt$cprf) & slopetabt$cprfu<1),]

    # only show lines that don't go 0 to 1
    slopetabt$dprf[slopetabt$dprfu-slopetabt$dprfl>=1]<-NA_real_
    slopetabt$dprfl[is.na(slopetabt$dprf)]<-NA_real_
    slopetabt$dprfu[is.na(slopetabt$dprf)]<-NA_real_
    slopetabt$cprf[slopetabt$cprfu-slopetabt$cprfl>=1]<-NA_real_
    slopetabt$cprfl[is.na(slopetabt$cprf)]<-NA_real_
    slopetabt$cprfu[is.na(slopetabt$cprf)]<-NA_real_
    slopetabt<-slopetabt[!is.na(slopetabt$dprf) | !is.na(slopetabt$cprf),]

  } else
  { tiff("c:/mike/covid/ms figs5/fig4 all.tif",
        width = 400, height = 1600, units = "px")#, compression = "lzw")
  }

  par(mar=c(5, 7, 4, 2) + 0.1)
  par(mfrow=c(1,1))

plot(slopetabt$dprf ,1:nrow(slopetabt),ylim=c(0,nrow(slopetabt)+1),yaxs="i",yaxt="n",ylab="",
xaxs="i",
      xlab="proportion of forgone contacts reclaimable without epidemic
resurgence",xlim=c(0,1),
      pch=ifelse(slopetabt$country %in% baddeaths,21,19))

axis(2,1:nrow(slopetabt), slopetabt$country ,las=2)

segments(slopetabt$dprfl ,1:nrow(slopetabt),slopetabt$dprfu ,1:nrow(slopetabt),
          lwd=ifelse(slopetabt$country %in% baddeaths,1,2))

```

```

points(slopetabt$cprf ,1:nrow(slopetabt)+0.2,col=2,
      pch=ifelse(slopetabt$country %in% badcases,21,19))

segments(slopetabt$cprf1 ,1:nrow(slopetabt)+0.2,
        slopetabt$cprfu ,1:nrow(slopetabt)+0.2,col=2,
        lwd=ifelse(slopetabt$country %in% badcases,1,2))

abline(v=0.2,lty="dotted")

dev.off()
}

par(mar=c(5, 4, 4, 2) + 0.1)

# supplementary plots: all country trajectories

for(i in 1:nrow(slopetab))
{
  if(!is.na(slopetab$cbfirstday[i]))
  { tiff(paste("C:/mike/covid/ms figs5/",slopetab[i,1]," cases fig.tif",sep=""),
        width = 600, height = 600, units = "px") #, compression = "lzw")
    par(mar=c(5, 4, 4, 2) + 0.1)
    try(trajplot(slopetab[i,1],"cases"),TRUE)
    dev.off()
  }

  if(!is.na(slopetab$dbfirstday[i]))
  { tiff(paste("C:/mike/covid/ms figs5/",slopetab[i,1]," deaths fig.tif",sep=""),
        width = 600, height = 600, units = "px") #, compression = "lzw")
    par(mar=c(5, 4, 4, 2) + 0.1)
    try(trajplot(slopetab[i,1],"deaths"),TRUE)
    dev.off()
  }
}

# supplementary table 1: summary data
# cases to date; deaths to date;
# first and last d2020, slopes, ses, doubling time + CI, r0 + CI, for each exponential period;
# - sort by name

slopetab2<-slopetab[order(slopetab[,1]),]

# and restore the NAs that were set to 1000000
slopetab2[slopetab2==1000000]<-NA_real_

# round and export
slopetab2<-cbind(country=slopetab2[,1],casemodel=ifelse(slopetab2[,1] %in% badcases,"?"," "),
                deathmodel=ifelse(slopetab2[,1] %in% baddeaths,"?"," "),
                round(slopetab2[,-1],3))
write.csv(slopetab2,"C:/mike/covid/ms figs5/slopetab2.csv")

# for table 1

# show information for the 6 largest epidemics

cbind(slopetab[order(-slopetab$deaths),][1:5,]$country,
      round(slopetab[order(-slopetab$deaths),][1:5,c("cases", "deaths", "dbdb1e", "dbdb1e1",
"dbdb1eu", "dahalve", "dahalve1", "dahalveu", "cbdb1e", "cbdb1e1", "cbdb1eu", "cahalve",
"cahalve1", "cahalveu")],3))

cbind(slopetab[order(-slopetab$deaths),][1:5,]$country,
      round(slopetab[order(-slopetab$deaths),][1:5,c("cases", "deaths",
"dbr0", "dbr01", "dbr0u", "dar0", "dar01", "dar0u",
"cbr0", "cbr01", "cbr0u", "car0", "car01", "car0u")],3))

```
